# Supplementary material for: Integrative Analysis Reveals the Transcriptional Collaboration between EZH2 and E2F1 in the Regulation of Cancer-Related Gene Expression
Source: Oxford University Press journal article supplement (doi:10.1158/1541-7786.mcr-15-0313), 2015-12-10
Supplement: 15417786mcr150313-sup-152701_1_supp_3153323_nv0fpn.xlsx [file 15417786mcr150313-sup-152701_1_supp_3153323_nv0fpn.xlsx]

## Sheet: ensemble peaks
Suppl. Table 1A: 22042 EZH2 ensemble peaks in abl. Genomic loci are in hg19.
chrom	peak summit	EZH2 intensity	H3K27me3 intensity	Overlap with E2F1 sites in Hela	Overlap with E2F1 sites in MCF7
chr1	917871	12.434	15.052	no	no
chr1	1136280	8	7.394	no	no
chr1	1138586	7.526	8.918	no	no
chr1	1139446	8.87	11.3	no	no
chr1	1175411	8.336	5.736	no	no
chr1	1223062	10.412	8.99	no	no
chr1	1225889	11.42	9.054	no	no
chr1	1226594	10.104	4.562	no	no
chr1	1268734	16.222	4.096	no	no
chr1	1290299	9.172	3.624	no	no
chr1	1295191	11.894	5.588	no	no
chr1	1296767	14.458	13.634	no	no
chr1	1519272	6.684	9.772	no	no
chr1	1566629	7.698	3.584	no	no
chr1	1871715	7.326	12.544	no	no
chr1	1873263	9.676	7.866	no	no
chr1	1896484	9.484	15.61	no	no
chr1	1898108	8.158	6.916	no	no
chr1	1906371	7.608	12.508	no	no
chr1	1912491	17.732	18.244	no	no
chr1	1950405	7.34	7.758	no	no
chr1	1951308	25.692	20.26	no	no
chr1	1952038	10.602	18.024	no	no
chr1	1953083	13.828	21.296	no	no
chr1	1953836	10.306	19.464	no	no
chr1	1956553	9.594	12.984	no	no
chr1	1957160	14.976	19.264	no	no
chr1	1957751	9.41	8.33	no	no
chr1	1958864	8.912	8.704	no	no
chr1	1959724	10.824	8.776	no	no
chr1	1961013	19.36	17.316	no	no
chr1	1963853	7.438	8.758	no	no
chr1	2254267	8.008	9.618	no	no
chr1	2256271	8.04	17.612	no	no
chr1	2263112	8.046	6.464	no	no
chr1	2264075	8.764	14.63	no	no
chr1	2267515	6.784	10.338	no	no
chr1	2268057	9.816	11.532	no	no
chr1	2268789	12.354	16.712	no	no
chr1	2270273	9.108	10.496	no	no
chr1	2270913	10.17	9.394	no	no
chr1	2306850	10.318	12.27	no	no
chr1	2308030	11.072	14.296	no	no
chr1	2308581	14.464	8.426	no	no
chr1	2309482	7.732	8.626	no	no
chr1	2349453	9.838	7.14	no	no
chr1	2349968	10.918	12.122	no	no
chr1	2350582	21.542	23.66	no	no
chr1	2351698	8.47	16.6	no	no
chr1	2358380	8.932	10.736	no	no
chr1	2365648	9.376	14.71	no	no
chr1	2374914	12.48	10.418	no	no
chr1	2375575	26.854	16.656	no	no
chr1	2377495	12.606	7.984	no	no
chr1	2378389	7.92	6.93	no	no
chr1	2394804	8.16	11.168	no	no
chr1	2398758	7.138	4.228	no	no
chr1	2434111	9.654	8.002	no	no
chr1	2436053	14.586	11.438	no	no
chr1	2437386	8.268	5.04	no	no
chr1	2498685	9.502	10.638	no	no
chr1	2559756	15.484	22.046	no	no
chr1	2560564	20.862	7.978	no	no
chr1	2562779	11.132	3.838	no	no
chr1	2574151	7.972	4.93	no	no
chr1	2574514	10.016	5.182	no	no
chr1	2583868	14.728	18.306	no	no
chr1	2585758	13.614	18.606	no	yes
chr1	2706093	15.63	15.894	no	no
chr1	2706751	8.054	10.928	no	no
chr1	2716326	9.2	12.142	no	no
chr1	2717277	11.306	11.556	no	no
chr1	2719030	11.82	9.826	no	no
chr1	2720116	15.274	8.246	no	no
chr1	2721017	8.798	10.74	no	no
chr1	2723118	15.092	17.942	no	no
chr1	2723877	12.216	10.596	no	no
chr1	2724589	13.018	19.134	no	no
chr1	2724907	9.222	14.758	no	no
chr1	2725828	8.582	11.748	no	no
chr1	2726254	9.176	12.638	no	no
chr1	2729713	7.854	21.152	no	no
chr1	2731411	11.74	18.564	no	no
chr1	2732200	10.928	15.89	no	no
chr1	2733325	14.706	16.016	no	no
chr1	2734466	9.912	6.526	no	no
chr1	2736837	8.798	8.596	no	no
chr1	2737968	8.038	9.534	no	no
chr1	2738664	12.328	13.408	no	no
chr1	2739394	9.544	14.35	no	no
chr1	2747550	6.858	8.38	no	no
chr1	2749841	8.544	11.908	no	no
chr1	2750761	19.05	19.674	no	no
chr1	2752152	10.862	15.522	no	no
chr1	2753169	8.878	13.768	no	no
chr1	2762442	10.946	21.824	no	no
chr1	2764016	11.566	19.436	no	no
chr1	2765085	8.62	17.236	no	no
chr1	2766439	11.076	9.858	no	no
chr1	2767142	10.688	10.6	no	no
chr1	2770531	12.614	19.862	no	no
chr1	2771061	10.256	21.482	no	no
chr1	2772097	26.964	22.828	no	no
chr1	2778732	9.554	9.188	no	no
chr1	2779996	9.074	7.184	no	no
chr1	2781965	9.724	12.224	no	no
chr1	2782487	10.078	10.562	no	no
chr1	2783140	12.178	11.036	no	no
chr1	2793010	12.896	12.844	no	no
chr1	2793713	12.522	16.04	no	no
chr1	2794523	12.066	14.096	no	no
chr1	2795817	9.294	9.688	no	no
chr1	2796591	10.312	18.242	no	no
chr1	2797159	8.476	13.684	no	no
chr1	2797612	8.392	12.182	no	no
chr1	2798472	10.818	9.096	no	no
chr1	2799528	11.91	13.412	no	no
chr1	2800208	11.474	15.764	no	no
chr1	2801019	8.742	8.974	no	no
chr1	2801960	12.976	14.16	no	no
chr1	2803624	11.058	8.884	no	no
chr1	2807114	9.556	12.326	no	no
chr1	2807490	8.198	11.108	no	no
chr1	2808181	15.024	12.27	no	no
chr1	2809258	12.848	15.232	no	no
chr1	2811205	10.368	12.128	no	no
chr1	2816910	9.824	9.588	no	no
chr1	2820578	20.914	19.424	no	no
chr1	2822307	12.4	18.17	no	no
chr1	2822921	20.234	11.536	no	no
chr1	2826794	12.49	13.758	no	no
chr1	2830797	9.538	5.768	no	no
chr1	2833678	8.68	9.944	no	no
chr1	2835165	8.056	14.2	no	no
chr1	2835778	10.4	17.906	no	no
chr1	2836447	9.258	20.418	no	no
chr1	2837368	11.124	16.34	no	no
chr1	2838707	7.466	7.63	no	yes
chr1	2840941	9.286	20.124	no	no
chr1	2841640	9.592	16.848	no	no
chr1	2842102	8.204	9.004	no	no
chr1	2843069	9.626	14.054	no	no
chr1	2845606	15.638	19.412	no	no
chr1	2847782	27.432	21.442	no	no
chr1	2850825	27.616	16.978	no	no
chr1	2852445	8.672	10.452	no	no
chr1	2863777	12.186	5.594	no	no
chr1	2865504	12.706	23.114	no	no
chr1	2865890	9.37	18.584	no	no
chr1	2866664	12.632	11.454	no	no
chr1	2884359	7.914	10.174	no	no
chr1	2885356	8.838	7.65	no	no
chr1	2887159	7.378	9.54	no	no
chr1	2896955	10.004	14.194	no	no
chr1	2898844	9.434	9.854	no	no
chr1	2899300	12.056	12.686	no	no
chr1	2900475	8.454	10.916	no	no
chr1	2900946	10.826	14.948	no	no
chr1	2904595	8.248	11.768	no	no
chr1	2916771	8.06	13.298	no	no
chr1	2918888	8.342	12.614	no	no
chr1	2919441	8.434	12.536	no	no
chr1	2920304	16.096	16.78	no	no
chr1	2921143	13.866	15.736	no	no
chr1	2921489	9.648	13.984	no	no
chr1	2928404	18.096	16.348	no	no
chr1	2929338	14.03	11.912	no	no
chr1	2930549	12.28	13.872	no	no
chr1	2931574	14.032	16.868	no	no
chr1	2932143	7.728	11.606	no	no
chr1	2933594	7.508	12.354	no	no
chr1	2934017	8.79	10.62	no	no
chr1	2934399	10.79	12.796	no	no
chr1	2935595	13.362	16.772	no	no
chr1	2936149	11.918	19.888	no	no
chr1	2938835	34.194	22.098	no	no
chr1	2940451	18.578	14.42	no	no
chr1	2945134	13.444	16.036	no	no
chr1	2946951	23.534	15.898	no	no
chr1	2948321	12.326	12.218	no	no
chr1	2954302	11.066	17.408	no	no
chr1	2955368	8.102	19.798	no	no
chr1	2956639	8.098	12.01	no	no
chr1	2959359	11.442	14.604	no	no
chr1	2971162	10.652	17.062	no	no
chr1	2976953	8.23	9.466	no	no
chr1	2979325	17.066	15.308	no	no
chr1	2980486	30.974	19.964	no	no
chr1	2981889	8.902	17.558	no	no
chr1	2985329	33.262	12.164	no	no
chr1	2986555	21.402	15.26	no	no
chr1	2987375	20.384	16.656	no	no
chr1	2990395	32.674	19.896	no	no
chr1	2992530	18.372	22.244	no	no
chr1	2994371	16.058	15.058	no	no
chr1	2996557	26.92	18.528	no	no
chr1	2999334	11.328	18.566	no	no
chr1	2999836	12.722	13.742	no	no
chr1	3002384	11.696	12.57	no	no
chr1	3003171	14.634	13.114	no	no
chr1	3004202	13.292	15.68	no	no
chr1	3004596	15.148	19.236	no	no
chr1	3006394	20.772	15.636	no	no
chr1	3008571	9.208	14.888	no	no
chr1	3010531	11.722	12.022	no	no
chr1	3011780	14.28	19.392	no	no
chr1	3012428	7.74	9.49	no	no
chr1	3013162	14.492	16.638	no	no
chr1	3013921	14.918	14.888	no	no
chr1	3014421	11.35	15.596	no	no
chr1	3016233	11.202	13.012	no	no
chr1	3016760	12.344	19.654	no	no
chr1	3017992	12.202	13.036	no	no
chr1	3021105	7.646	14.83	no	no
chr1	3022033	13.028	13.434	no	no
chr1	3027757	11.222	13.832	no	no
chr1	3028292	9.682	9.868	no	no
chr1	3029083	11.036	14.51	no	no
chr1	3032233	11.268	10.636	no	no
chr1	3033097	14.854	15.53	no	no
chr1	3036529	10.872	17.132	no	no
chr1	3038175	16.862	18.506	no	no
chr1	3039655	9.868	16.294	no	no
chr1	3050795	11.434	15.814	no	no
chr1	3052409	18.214	19.594	no	no
chr1	3053947	11.296	18.374	no	no
chr1	3055133	14.518	16.664	no	no
chr1	3056049	22.578	17.322	no	no
chr1	3059411	23.372	12.686	no	no
chr1	3060548	10.152	20.56	no	no
chr1	3062093	8.932	12.228	no	no
chr1	3063054	12.878	15.302	no	no
chr1	3064289	8.27	14.994	no	no
chr1	3068121	9.236	12.95	no	no
chr1	3070010	17.624	16.402	no	no
chr1	3070919	18.644	21.32	no	no
chr1	3072245	20.646	17.908	no	no
chr1	3073461	13.534	18.794	no	no
chr1	3074299	7.236	11.99	no	no
chr1	3074803	6.838	7.69	no	no
chr1	3077213	17.514	22.294	no	no
chr1	3080509	8.176	8.422	no	no
chr1	3081519	8.638	11.442	no	no
chr1	3087786	8.864	4.746	no	no
chr1	3100994	9.938	7.696	no	no
chr1	3106703	7.664	5.236	no	no
chr1	3109715	9.884	15.726	no	no
chr1	3110798	13.366	18.288	no	no
chr1	3111649	14.752	21.794	no	no
chr1	3113615	13.43	9.676	no	no
chr1	3115230	19.46	19.296	no	no
chr1	3116433	10.258	19.266	no	no
chr1	3117645	9.35	13.78	no	no
chr1	3118283	12.21	18.084	no	no
chr1	3119185	8.59	14.026	no	no
chr1	3120545	13.318	10.114	no	no
chr1	3121203	14.076	15.316	no	no
chr1	3122453	17.532	18.696	no	no
chr1	3124131	19.262	19.932	no	no
chr1	3126061	13.862	18.668	no	no
chr1	3126917	10.862	15.866	no	no
chr1	3127045	10.552	15.934	no	no
chr1	3128380	30.476	27.824	no	no
chr1	3130201	22.204	16.168	no	no
chr1	3132008	12.962	18.678	no	no
chr1	3132870	7.948	16.072	no	no
chr1	3133353	7.8	20.194	no	no
chr1	3134008	15.846	19.44	no	no
chr1	3134602	8.51	16.03	no	no
chr1	3136468	18.01	24.032	no	no
chr1	3137249	10.37	18.532	no	no
chr1	3137746	9.59	16.88	no	no
chr1	3140110	14.14	17.108	no	no
chr1	3142905	23.326	20.704	no	no
chr1	3143759	23.962	13.188	no	no
chr1	3147289	26.036	22.414	no	no
chr1	3149320	9.876	12.488	no	no
chr1	3150012	22.396	16.712	no	no
chr1	3151075	9.756	17.704	no	no
chr1	3151507	8.194	12.93	no	no
chr1	3152008	9.938	8.884	no	no
chr1	3154435	9.242	15.7	no	no
chr1	3155573	12.5	22.302	no	no
chr1	3155923	8.576	19.382	no	no
chr1	3157756	26.658	26.98	no	no
chr1	3162449	8.46	14.142	no	no
chr1	3164208	22.278	21.512	no	no
chr1	3164788	11.768	8.344	no	no
chr1	3165391	10.104	11.232	no	no
chr1	3165968	11.17	7.434	no	no
chr1	3166575	13.124	12.272	no	no
chr1	3167454	8.256	7.946	no	no
chr1	3167952	9.236	5.808	no	no
chr1	3168236	7.9	7.414	no	no
chr1	3168838	7.41	11.564	no	no
chr1	3172386	11	21.266	no	no
chr1	3174118	8.234	11.354	no	no
chr1	3175979	9.26	12.926	no	no
chr1	3179507	11.08	16.92	no	no
chr1	3180764	9.88	8.554	no	no
chr1	3182981	20.046	12.846	no	no
chr1	3184577	24.866	15.666	no	no
chr1	3186213	8.502	14.932	no	no
chr1	3186734	11.068	17.666	no	no
chr1	3187422	19.168	22.876	no	no
chr1	3191756	11.608	13.214	no	no
chr1	3192313	9.384	17.224	no	no
chr1	3192667	9.936	15.226	no	no
chr1	3193271	12.012	17.786	no	no
chr1	3193773	9.548	20.574	no	no
chr1	3195042	8.468	10.588	no	no
chr1	3196199	15.36	13.54	no	no
chr1	3196939	11.854	13.678	no	no
chr1	3199565	16.082	14.234	no	no
chr1	3200603	18.602	15.762	no	no
chr1	3201252	12.976	14.61	no	no
chr1	3202313	9.624	14.112	no	no
chr1	3203725	18.97	13.018	no	no
chr1	3204629	23.162	21.274	no	no
chr1	3205894	9.79	19.648	no	no
chr1	3206363	12.3	13.58	no	no
chr1	3207015	9.064	13.344	no	no
chr1	3207909	9.894	16.362	no	no
chr1	3210456	27.604	20.146	no	no
chr1	3211587	19.104	16.952	no	no
chr1	3213634	12.142	16.372	no	no
chr1	3214884	19.158	25.582	no	no
chr1	3221173	10.126	17.058	no	no
chr1	3225172	13.43	17.562	no	no
chr1	3226044	8.33	15.502	no	no
chr1	3226598	12.162	10.22	no	no
chr1	3228681	11.444	16.66	no	no
chr1	3229648	11.88	12.632	no	yes
chr1	3231210	15.588	21.53	no	no
chr1	3232365	12.646	17.176	no	no
chr1	3263475	8.932	7.38	no	no
chr1	3264275	10.414	10.21	no	no
chr1	3265960	12.876	10.98	no	no
chr1	3267447	8.122	10.162	no	no
chr1	3273013	18.606	18.084	no	no
chr1	3274017	16.928	17.114	no	no
chr1	3275244	16.53	26.746	no	no
chr1	3276004	15.128	17.502	no	no
chr1	3279536	27.212	23.414	no	no
chr1	3280436	16.522	13.976	no	no
chr1	3281574	18.212	16.012	no	no
chr1	3282576	14.49	20.228	no	no
chr1	3283959	12.29	19.572	no	no
chr1	3285053	15.182	15.52	no	no
chr1	3285941	9.696	14.966	no	no
chr1	3289682	14.52	16.976	no	no
chr1	3290592	17.27	24.538	no	no
chr1	3291535	11.038	17.004	no	no
chr1	3291879	10.14	13.922	no	no
chr1	3299352	8.332	13.514	no	no
chr1	3300246	8.116	11.2	no	no
chr1	3300998	8.832	10.908	no	no
chr1	3302296	17.054	27.002	no	no
chr1	3307221	44.008	22.066	no	no
chr1	3310254	47.916	27.174	no	no
chr1	3311950	12.122	24.356	no	no
chr1	3312511	14.774	24.564	no	no
chr1	3314057	25.76	29.752	no	no
chr1	3315432	10.168	18.678	no	no
chr1	3317135	11.688	9.13	no	no
chr1	3320303	10.468	13.074	no	no
chr1	3321407	22.542	18.94	no	no
chr1	3324308	9.734	15.042	no	no
chr1	3325530	18.212	26.324	no	no
chr1	3326320	12.052	21.094	no	no
chr1	3326821	11.202	12.37	no	no
chr1	3328173	28.038	19.952	no	no
chr1	3330601	15.718	17.688	no	no
chr1	3332216	14.322	16.01	no	no
chr1	3335309	7.714	12.07	no	no
chr1	3336290	9.934	13.794	no	no
chr1	3337015	12.406	11.294	no	no
chr1	3337455	12.11	20.384	no	no
chr1	3340065	14.508	13.78	no	no
chr1	3341390	17.544	6.284	no	no
chr1	3342068	10.73	10.896	no	no
chr1	3342616	10.286	15.818	no	no
chr1	3344060	7.882	15.012	no	no
chr1	3346347	10.014	12.06	no	no
chr1	3347049	8.834	12.616	no	no
chr1	3348224	12.196	13.686	no	no
chr1	3348900	11.422	14.744	no	no
chr1	3350523	20.502	21.996	no	no
chr1	3351542	23.35	17.73	no	no
chr1	3352386	33.87	22.818	no	no
chr1	3354099	9.444	19.706	no	no
chr1	3357705	12.486	15.536	no	no
chr1	3358476	11.804	10.622	no	no
chr1	3358957	18.304	19.272	no	no
chr1	3359658	12.498	14.588	no	no
chr1	3361147	9.3	10.926	no	no
chr1	3414333	9.45	7.27	no	no
chr1	3415307	7.67	5.736	no	no
chr1	3416394	7.538	6.36	no	no
chr1	3416981	9.64	5.74	no	no
chr1	3418750	9.724	6.256	no	no
chr1	3421606	10.218	8.908	no	no
chr1	3425654	17.056	17.946	no	no
chr1	3426466	10.752	12.402	no	no
chr1	3427533	9.996	12.62	no	no
chr1	3427986	8.136	15.238	no	no
chr1	3451720	9.806	11.536	no	no
chr1	3460240	7.654	7.644	no	no
chr1	3462089	6.94	10.65	no	no
chr1	3470454	6.552	4.168	no	no
chr1	3472962	10.884	10.774	no	no
chr1	3473613	13.598	17.378	no	no
chr1	3474592	12.882	22.046	no	no
chr1	3475210	8.724	23.9	no	no
chr1	3478070	14.718	14.046	no	no
chr1	3495977	9.908	12.246	no	no
chr1	3512316	10.38	12.234	no	no
chr1	3512762	10.746	13.526	no	no
chr1	3514862	9.998	14.26	no	no
chr1	3515413	7.722	4.936	no	no
chr1	3516750	7.98	11.058	no	no
chr1	3517102	11.956	10.768	no	no
chr1	3517886	7.168	11.648	no	no
chr1	3518432	8.044	9.168	no	no
chr1	3527922	10.732	7.388	no	yes
chr1	3528748	8.678	9.648	no	no
chr1	3532852	7.642	12.79	no	no
chr1	3533551	11.072	7.198	no	no
chr1	3534543	8.73	13.362	no	no
chr1	3568005	41.432	25.814	no	no
chr1	3571031	9.944	7.54	no	no
chr1	3571502	6.936	14.816	no	no
chr1	3574617	8.18	9.582	no	no
chr1	3605430	8.126	10.05	no	no
chr1	3606804	9.374	10.666	no	no
chr1	3607614	9.086	10.946	no	no
chr1	3612526	10.482	4.588	no	no
chr1	3615559	9.366	19.688	no	no
chr1	3616112	9.102	14.346	no	no
chr1	3616756	9.272	9.952	no	no
chr1	3624449	9.482	5.836	no	no
chr1	3629794	8.302	6.826	no	no
chr1	3634582	8.62	10.43	no	no
chr1	3635917	9.424	11.26	no	no
chr1	3644623	10.392	11.6	no	no
chr1	3645123	7.512	9.888	no	no
chr1	3647583	8.966	6.878	no	no
chr1	3648767	8.472	4.136	no	no
chr1	3669302	9.924	20.322	no	no
chr1	3672171	8.516	16.042	no	no
chr1	3673446	11.91	26.62	no	no
chr1	3677632	10.058	27.156	no	no
chr1	3677893	12.028	24.188	no	no
chr1	3680006	21.614	18.516	no	no
chr1	3683090	11.366	13.254	no	no
chr1	3728089	8.494	4.36	no	no
chr1	3824264	8.796	8.5	no	no
chr1	3826986	13.564	12.16	no	no
chr1	3832483	11.65	14.9	no	no
chr1	4000087	11.286	23.964	no	no
chr1	4002836	12.914	10.536	no	no
chr1	4003235	12.528	12.256	no	no
chr1	4004691	25.844	25.938	no	no
chr1	4014746	15.23	21.272	no	no
chr1	4015608	9.7	18.352	no	no
chr1	4037302	14.268	21.026	no	no
chr1	4042471	9.252	8.58	no	no
chr1	4043529	7.984	16.416	no	no
chr1	4044666	12.396	17.814	no	no
chr1	4060148	16.072	17.248	no	no
chr1	4071262	15.086	19.928	no	no
chr1	4080103	9.094	11.236	no	no
chr1	4092646	8.882	13.984	no	no
chr1	4111667	8.774	10.258	no	no
chr1	4118825	10.058	16.826	no	no
chr1	4122004	9.166	4.642	no	no
chr1	4135827	7.654	8.766	no	no
chr1	4169019	9.806	11.544	no	no
chr1	4169744	8.588	12.694	no	no
chr1	4187586	9.614	22.758	no	no
chr1	4189058	10.034	17.118	no	no
chr1	4192755	17.018	19.304	no	no
chr1	4193764	10.852	20.372	no	no
chr1	4194156	8.638	12.604	no	no
chr1	4209366	8.542	9.42	no	no
chr1	4221404	6.74	11.948	no	no
chr1	4225706	8.158	8.158	no	no
chr1	4231946	7.55	10.938	no	no
chr1	4687656	9.662	12.234	no	no
chr1	4696385	9.488	12.69	no	no
chr1	4696897	19.202	14.182	no	no
chr1	4698295	12.004	17.024	no	no
chr1	4714346	14.924	14.938	no	no
chr1	4715559	13.272	7.388	no	no
chr1	4716439	22.396	18.212	no	no
chr1	4718814	9.83	14.95	no	no
chr1	4725043	7.666	14.66	no	no
chr1	4725960	12.63	17.982	no	no
chr1	4727347	12.402	18.272	no	no
chr1	4758028	9.11	17.672	no	no
chr1	4759086	9.308	20.078	no	no
chr1	4760394	8.312	12.106	no	no
chr1	4761037	9.366	14.04	no	no
chr1	4771438	14.644	8.252	no	no
chr1	4779720	6.816	20.918	no	no
chr1	4782557	8.192	20.656	no	no
chr1	4783545	8.568	19.8	no	no
chr1	4832461	14.692	19.86	no	no
chr1	4832763	13.482	20.44	no	no
chr1	4833864	13.264	13.452	no	no
chr1	4834997	11.39	13.19	no	no
chr1	4835319	14.08	11.498	no	no
chr1	4835925	12.038	19.83	no	no
chr1	4841236	12.082	20.11	no	no
chr1	4841701	10.47	17.868	no	no
chr1	4846282	9.258	12.04	no	no
chr1	5038866	7.676	9.982	no	no
chr1	5367248	8.58	12.71	no	no
chr1	5484818	9.618	14.494	no	no
chr1	5532579	8.886	11.194	no	no
chr1	5533337	10.344	25.152	no	no
chr1	5538717	10.022	11.828	no	no
chr1	5539283	11.256	16.656	no	no
chr1	5539951	18.066	21.018	no	no
chr1	5540642	10.368	15.808	no	no
chr1	5553418	6.656	10.052	no	no
chr1	5564466	7.744	9.134	no	no
chr1	5570272	10.226	8.374	no	no
chr1	5676764	9.976	17.714	no	no
chr1	5677479	13.448	23.906	no	no
chr1	5711197	13.298	19.44	no	no
chr1	5712031	9.4	17.572	no	no
chr1	5712525	17.166	12.24	no	no
chr1	5765447	8.142	12.984	no	no
chr1	5768806	9.962	16.68	no	no
chr1	5769787	9.018	14.398	no	no
chr1	5772432	11.638	22.198	no	no
chr1	5779253	10.62	15.382	no	no
chr1	5805889	13.256	5.294	no	no
chr1	5806421	10.05	13.078	no	no
chr1	5808425	7.682	16.764	no	no
chr1	5811193	12.852	15.428	no	no
chr1	5812941	9.438	18.42	no	no
chr1	5813977	12.98	15.386	no	no
chr1	5814315	10.434	14.836	no	no
chr1	5815903	12.286	16.188	no	no
chr1	5816836	10.108	17.642	no	no
chr1	5817124	9.758	18.954	no	no
chr1	5818464	7.334	11.918	no	no
chr1	5826844	11.662	13.548	no	no
chr1	5828216	17.318	20.91	no	no
chr1	5829028	10.682	18.79	no	no
chr1	5870895	9.01	12.238	no	no
chr1	5871880	8.932	9.584	no	no
chr1	5874470	14.176	21.444	no	no
chr1	5882775	12.446	19.89	no	no
chr1	5893715	12.458	17.794	no	no
chr1	5894202	13.114	13.688	no	no
chr1	5894893	10.33	19.732	no	no
chr1	5897378	17.904	22.452	no	no
chr1	5898150	8.212	11.208	no	no
chr1	5899042	8.756	10.246	no	no
chr1	5900879	16.09	12.292	no	no
chr1	5902016	9.568	14.914	no	no
chr1	5902379	8.826	10.09	no	no
chr1	5907157	11.488	8.162	no	no
chr1	6223362	9.386	15.002	no	no
chr1	6227238	9.892	14.132	no	no
chr1	6238390	10.696	13.324	no	no
chr1	6239255	27.168	18.804	no	no
chr1	6240422	8.76	9.87	no	no
chr1	6240931	13.772	11.432	no	no
chr1	6266094	7.79	5.366	no	yes
chr1	6302062	39.998	20.35	no	no
chr1	6303078	14.606	17.374	no	no
chr1	6304831	8.292	15.666	no	no
chr1	6305283	17.12	4.494	no	no
chr1	6309186	17.532	13.378	no	no
chr1	6310228	16.788	21.002	no	no
chr1	6313950	8.018	9.418	no	no
chr1	6320062	14.608	14.364	no	yes
chr1	6320754	19.402	16.86	no	yes
chr1	6321537	13.094	17.748	no	no
chr1	6478622	9.654	12.416	no	no
chr1	6479332	18.354	18.598	no	no
chr1	6481139	8.284	5.23	no	no
chr1	6484360	10.376	17.93	no	no
chr1	6514264	10.132	12.418	no	no
chr1	6514726	15.486	14.15	no	no
chr1	6515644	15.278	7.972	no	no
chr1	6521801	7.542	7.092	no	no
chr1	6545329	18.758	15.334	no	no
chr1	6556625	10.348	13.616	no	no
chr1	6557191	9.384	12.032	no	no
chr1	6557739	11.144	7.822	no	yes
chr1	6994436	10.89	17.892	no	no
chr1	6995700	21.97	12.742	no	no
chr1	7041000	6.932	8.54	no	no
chr1	7046166	14.484	18.75	no	no
chr1	7047808	10.316	28.868	no	no
chr1	7047968	10.766	27.788	no	no
chr1	7066677	8.812	16.022	no	no
chr1	7067967	10.196	16.132	no	no
chr1	7069659	9.952	24.704	no	no
chr1	7070695	9.306	13.84	no	no
chr1	7071087	12.182	15.678	no	no
chr1	7081110	14.77	13.542	no	no
chr1	7081524	12.304	9.278	no	no
chr1	7101225	8.886	9.468	no	no
chr1	7104399	12.972	20.662	no	no
chr1	7110260	16.068	24.036	no	no
chr1	7111433	13.386	20.64	no	no
chr1	7112816	8.756	18.238	no	no
chr1	7113168	10.594	20.686	no	no
chr1	7118340	9.706	14.192	no	no
chr1	7120552	10.666	19.844	no	no
chr1	7121412	17.416	23.544	no	no
chr1	7122668	16.148	23.062	no	no
chr1	7130726	13.916	6.44	no	no
chr1	7144553	17.088	24.942	no	no
chr1	7146293	10.87	12.05	no	no
chr1	7152866	10.584	15.462	no	no
chr1	7153842	16.556	19.584	no	no
chr1	7155134	9.362	13.458	no	no
chr1	7155754	18.536	27.5	no	no
chr1	7156437	12.018	16.222	no	no
chr1	7157171	13.932	20.854	no	no
chr1	7157276	14.514	20.87	no	no
chr1	7159860	9.538	11.076	no	no
chr1	7160742	11.014	10.35	no	no
chr1	7161158	8.72	9.272	no	no
chr1	7213815	12.586	17.666	no	no
chr1	7214818	7.562	12.154	no	no
chr1	7232508	7.438	15.504	no	no
chr1	7233064	14.256	20.864	no	no
chr1	7284936	11.982	11.814	no	no
chr1	7287836	6.48	6.994	no	no
chr1	7291066	8.412	15.736	no	no
chr1	7307971	15.148	17.886	no	no
chr1	7308874	9.304	13.06	no	no
chr1	7316791	8.642	10.642	no	no
chr1	7323005	13.108	13.428	no	no
chr1	7353301	11.034	17.214	no	no
chr1	7412140	8.732	6.358	no	no
chr1	7432053	10.954	18.246	no	no
chr1	7488311	9.862	11.826	no	no
chr1	7515840	8.96	8.822	no	no
chr1	7536811	11.746	12.388	no	no
chr1	7538007	9.544	8.98	no	no
chr1	7538555	15.386	8.99	no	yes
chr1	7567967	7.992	14.218	no	no
chr1	7569315	8.158	8.492	no	no
chr1	7573181	10.744	17.314	no	no
chr1	7574805	7.494	10.224	no	no
chr1	7580804	7.956	15.598	no	no
chr1	7585107	12.542	18.998	no	no
chr1	7587019	8.024	9.354	no	no
chr1	7595126	9.028	9.968	no	no
chr1	7597675	9.786	13.55	no	no
chr1	7615499	6.586	7.378	no	no
chr1	7617913	15.536	14.512	no	no
chr1	7648607	9.156	8.664	no	no
chr1	7685540	14.362	20.826	no	no
chr1	7690887	8.04	7.442	no	no
chr1	7692102	13.42	13.838	no	no
chr1	7692924	8.878	19.364	no	no
chr1	7694146	13.536	23.83	no	no
chr1	7695258	9.252	13.324	no	no
chr1	7697299	12.638	15.226	no	no
chr1	7700846	15.48	16.602	no	no
chr1	7702140	9.05	14.026	no	no
chr1	7721981	11.046	13.7	no	no
chr1	7735779	10.198	17.932	no	no
chr1	7736857	8.432	12.046	no	no
chr1	7737847	8.532	11.964	no	no
chr1	7739368	11.33	15.292	no	no
chr1	7740394	24.814	16.862	no	no
chr1	7743753	10.14	17.742	no	no
chr1	7744481	11.726	15.518	no	no
chr1	7745415	10.256	16.528	no	no
chr1	7746703	8.426	12.39	no	no
chr1	7749778	9.87	10.084	no	no
chr1	7750881	10.8	13.218	no	no
chr1	7763869	8.532	12.008	no	no
chr1	7765413	14.656	15.914	no	no
chr1	7765794	9.346	15.696	no	no
chr1	7792431	10.386	17.67	no	no
chr1	7792761	8.274	17.226	no	no
chr1	7797193	10.49	16.78	no	no
chr1	7798631	13.128	16.438	no	no
chr1	8002618	18.952	14.35	no	yes
chr1	9258704	8.338	13.194	no	no
chr1	9263134	8.02	13.846	no	no
chr1	9711497	14.66	20.19	no	yes
chr1	9712434	27.464	21.538	no	no
chr1	9713649	7.664	11.042	no	no
chr1	9749398	7	3.682	no	yes
chr1	10057485	18.566	10.356	no	no
chr1	11456495	9.478	11.738	no	no
chr1	11490410	11.156	18.038	no	no
chr1	11499094	9.894	14.18	no	no
chr1	11499702	7.794	17.858	no	no
chr1	11500881	8.422	15.682	no	no
chr1	11502891	10.51	18.038	no	no
chr1	11539161	16.932	5.516	no	yes
chr1	11540265	21.246	12.884	no	no
chr1	11561200	9.664	18.216	no	no
chr1	11561637	8.324	16.602	no	no
chr1	11591588	8.772	12.536	no	no
chr1	11601517	12.168	13.74	no	yes
chr1	11620281	7.266	10.412	no	no
chr1	11638990	7.066	14.354	no	no
chr1	11645850	7.514	15.818	no	no
chr1	11751036	27.69	25.814	no	yes
chr1	11752196	28.76	22.77	no	no
chr1	11919360	28.384	20.576	no	no
chr1	11959160	9.178	13.368	no	no
chr1	12123748	27.73	35.052	no	no
chr1	12226909	9.612	6.574	no	no
chr1	12239355	9.534	13.77	no	no
chr1	12241142	9.3	5.744	no	no
chr1	12251924	22.356	18.036	no	no
chr1	13783910	9.146	12.182	no	no
chr1	13814009	8.76	20.018	no	no
chr1	13816466	9.84	11.674	no	no
chr1	13817555	8.574	15.114	no	no
chr1	13826236	10.688	13.914	no	no
chr1	13831743	10.708	19.686	no	no
chr1	13838811	10.776	17.194	no	no
chr1	13839696	18.838	26.632	no	no
chr1	13840557	16.908	21.524	no	no
chr1	13843327	8.778	10.586	no	no
chr1	13903802	8.712	25.614	no	no
chr1	13910291	24.432	16.714	no	no
chr1	14219353	11.496	13.792	no	yes
chr1	14668093	10.986	8.82	no	no
chr1	14919304	8.302	9.834	no	no
chr1	14925830	34.964	33.258	no	no
chr1	17019663	22.182	15.53	no	no
chr1	18435264	9.454	8.698	no	no
chr1	18435703	9.158	7.252	no	no
chr1	18956776	12.114	5.488	no	no
chr1	18957737	16.722	5.378	no	no
chr1	18958471	19.842	8.484	no	no
chr1	18959933	7.226	8.018	no	no
chr1	18960377	13.814	8.798	no	no
chr1	18963005	22.31	17.058	no	no
chr1	18964100	17.682	12.69	no	no
chr1	18964943	9.902	10.434	no	no
chr1	18966544	11.216	7.968	no	no
chr1	18967106	10.284	13.576	no	no
chr1	18967989	15.276	14.5	no	no
chr1	18969010	7.804	11.574	no	no
chr1	18970311	31.714	12.28	no	no
chr1	18971834	13.97	11.344	no	no
chr1	19041417	7.776	7.066	no	no
chr1	19043172	11.296	7.278	no	no
chr1	19043999	18.374	13.118	no	no
chr1	19971424	10.664	9.244	yes	no
chr1	20811568	23.986	13.406	no	no
chr1	20813092	17.6	13.086	no	no
chr1	20879378	22.828	12.77	no	no
chr1	22889574	11.896	15.352	no	no
chr1	22890626	11.068	13.64	no	no
chr1	22893803	7.334	6.292	no	no
chr1	22915535	12.512	17.378	no	no
chr1	22918764	7.926	6.748	no	no
chr1	23038547	11.288	9.378	no	no
chr1	23238961	8.154	3.578	no	no
chr1	23543600	10.152	10.354	no	no
chr1	23544109	11.866	8.928	no	no
chr1	26737558	8.566	6.864	no	no
chr1	27385902	7.918	3.552	no	no
chr1	27960923	18.166	19.596	no	no
chr1	29138446	10.746	20.5	no	no
chr1	29139150	32.272	26.502	no	no
chr1	29143284	9.648	15.256	no	no
chr1	29447938	9.776	6.202	no	no
chr1	29448472	17.844	12.368	no	no
chr1	29449443	9.346	17.8	no	no
chr1	29449763	13.99	16.428	no	no
chr1	29450950	33.702	20.372	no	no
chr1	29563914	20.632	13.516	no	yes
chr1	29670358	8.796	11.098	no	no
chr1	29688459	10.214	12.5	no	no
chr1	29688726	10.266	11.752	no	no
chr1	29766062	11.272	15.128	no	no
chr1	29800192	12.052	12.754	no	no
chr1	29804806	14.598	22.392	no	no
chr1	29830394	7.712	4.624	no	no
chr1	29850064	9.308	15.088	no	no
chr1	29865939	9.626	9.792	no	no
chr1	30049714	12.044	13.752	no	no
chr1	30050650	10.076	13.354	no	no
chr1	30159510	7.686	13.806	no	no
chr1	30240196	9.342	22.092	no	no
chr1	30257014	7.782	10.82	no	no
chr1	30262477	7.688	9.08	no	no
chr1	30274900	7.454	7.6	no	no
chr1	30372159	8.468	14.174	no	no
chr1	30686840	8.772	14.26	no	no
chr1	30704056	7.996	12.052	no	no
chr1	30847186	7.986	11.674	no	no
chr1	31113247	10.042	5.754	no	no
chr1	31117079	8.198	15.462	no	no
chr1	31712162	47.478	26.178	no	yes
chr1	31713073	19.658	19.746	no	no
chr1	32083614	15.492	6.762	no	no
chr1	32181484	10.808	5.374	no	no
chr1	32228723	9.744	6.366	no	no
chr1	32930759	15.584	12.368	no	yes
chr1	33336775	14.816	11.674	no	no
chr1	33352320	10.286	6.49	no	no
chr1	34099181	11.93	6.272	no	no
chr1	34100442	10.346	9.17	no	no
chr1	34629553	34.114	29.102	no	no
chr1	34630811	31.378	17.788	no	no
chr1	34633200	9.062	9.8	no	no
chr1	34642285	10.718	18.19	no	no
chr1	34642943	11.504	18.42	no	no
chr1	34814966	7.932	12.202	no	no
chr1	34903762	10.106	9.428	no	no
chr1	35118043	7.552	15.228	no	no
chr1	35195938	7.668	10.294	no	no
chr1	35247085	13.364	19.67	no	no
chr1	35247509	10.948	12.904	no	no
chr1	35350879	12.042	18.98	no	no
chr1	35369772	11.004	15.622	no	no
chr1	35370295	11.51	13.524	no	no
chr1	35394658	30.848	28.594	no	no
chr1	35395555	33.24	22.36	no	no
chr1	35396824	9.182	11.952	no	no
chr1	36172844	9.09	16.996	no	no
chr1	36173369	13.02	11.262	no	yes
chr1	36174216	8.18	17.306	no	no
chr1	36174869	7.2	5.208	no	no
chr1	36590351	7.302	7.994	no	no
chr1	36591297	9.622	8.5	no	no
chr1	36969387	7.672	8.108	no	no
chr1	37017057	10.206	6.922	no	no
chr1	37038025	9.466	10.274	no	no
chr1	37061234	8.368	11.33	no	no
chr1	37108584	7.536	7.364	no	no
chr1	37125474	7.968	10.246	no	no
chr1	37135422	10.548	13.658	no	no
chr1	37173591	9.414	10.052	no	no
chr1	37175939	8.388	9.7	no	no
chr1	37203686	8.914	8.524	no	no
chr1	37204239	10.54	12.756	no	no
chr1	37237236	8.54	5.746	no	yes
chr1	37267311	9.202	23.15	no	no
chr1	37270450	13.526	14.13	no	no
chr1	37277640	9.21	9.466	no	no
chr1	37287083	9.488	20.832	no	no
chr1	37288607	8.04	17.18	no	no
chr1	37289811	8.7	15.934	no	no
chr1	37296859	13.43	20.928	no	no
chr1	37307252	10.968	16.624	no	no
chr1	37307721	10.34	13.838	no	no
chr1	37311539	7.732	9.396	no	no
chr1	37315563	9.458	16.644	no	no
chr1	37316018	10.312	16.236	no	no
chr1	37319059	8.456	14.48	no	no
chr1	37319661	9.46	17.702	no	no
chr1	37320576	12.078	18.724	no	no
chr1	37398143	7.678	9.816	no	no
chr1	37420204	8.056	7.066	no	no
chr1	37496661	6.928	6.724	no	no
chr1	37498011	11.034	16.708	no	no
chr1	37499019	44.384	26.02	no	no
chr1	37500313	31.476	11.856	no	yes
chr1	37503404	10.914	11.69	no	yes
chr1	37513224	8.772	17.854	no	no
chr1	37599215	11.252	15.374	no	no
chr1	37599709	11.002	17.664	no	no
chr1	37758380	9.562	16.604	no	no
chr1	37760710	10.118	12.616	no	no
chr1	37783653	15.564	25.888	no	no
chr1	37784429	8.504	18.9	no	no
chr1	37828433	7.746	15.258	no	no
chr1	38082548	18.232	25.068	no	no
chr1	38086918	12.68	25.26	no	no
chr1	38095417	8.33	13.062	no	no
chr1	38100129	42.042	32.492	no	no
chr1	38227449	24.708	24.09	no	no
chr1	38230049	11.44	10.088	no	yes
chr1	38509148	15.056	20.292	no	no
chr1	38510071	23.216	17.13	no	no
chr1	38511402	24.338	26.162	no	no
chr1	38512801	14.798	11.768	no	yes
chr1	38513238	8.992	7.986	no	yes
chr1	38599101	9.968	15.498	no	no
chr1	38600433	10.648	14.742	no	no
chr1	38899098	8.92	14.864	no	no
chr1	38919014	8.34	13.254	no	no
chr1	38941996	12.794	13.586	no	no
chr1	39044053	15.842	16.674	no	no
chr1	39062705	10.772	17.444	no	no
chr1	39151281	8.482	18.766	no	no
chr1	39220811	10.694	14.108	no	no
chr1	39249702	10.946	15.188	no	no
chr1	39270033	15.288	11.448	no	no
chr1	39273005	11.216	17.804	no	no
chr1	39284636	13.512	12.972	no	no
chr1	39547513	16.462	10.156	no	yes
chr1	40137479	18.278	12.698	no	no
chr1	40193924	10.472	13.702	no	no
chr1	42048841	11.514	14.636	no	no
chr1	42127410	10.026	13.79	no	yes
chr1	42383941	11.432	9.666	no	no
chr1	44871560	48.052	24.532	no	no
chr1	44872701	52.62	31.452	no	no
chr1	44883880	15.456	18.598	no	no
chr1	44894204	8.192	12.518	no	no
chr1	44966468	10.354	11.168	no	no
chr1	44973579	11.94	15.956	no	no
chr1	47689721	12.408	24.11	no	no
chr1	47690825	30.592	21.076	no	no
chr1	47691544	10.614	11.15	no	no
chr1	47695353	10.454	15.26	no	no
chr1	47697193	35.038	28.02	no	no
chr1	47881731	16.034	14.078	no	no
chr1	47882367	19.556	7.308	no	no
chr1	47910603	54.598	35.126	no	no
chr1	47915841	13.424	6.214	no	no
chr1	48175300	53.444	37.104	no	yes
chr1	50881962	25.446	22.022	no	no
chr1	50884365	15.178	19.394	no	no
chr1	50885295	22.444	17.016	no	no
chr1	50886322	8.714	9.07	no	no
chr1	50889710	10.304	11.858	no	no
chr1	50890574	17.076	22.662	no	no
chr1	50893465	23.75	18.098	no	no
chr1	53527640	13.624	14.44	no	no
chr1	53528138	21.002	16.676	no	no
chr1	53861620	10.74	11.606	no	no
chr1	53925694	8.678	8.566	no	no
chr1	53925960	8.656	10.43	no	no
chr1	54151014	10.374	11.02	no	no
chr1	54151590	10.56	13.884	no	no
chr1	54204559	8.548	4.598	no	no
chr1	55446667	10.088	18.068	no	no
chr1	55505782	35.152	29.246	no	no
chr1	57888387	17.832	10.24	no	no
chr1	57889437	12.65	16.172	no	yes
chr1	58715407	9.02	11.396	no	no
chr1	60629710	10.354	10.452	no	no
chr1	60833501	12.742	13.212	no	no
chr1	62784709	38.582	26.136	no	no
chr1	62785978	8.882	17.502	no	no
chr1	63539785	29.444	22.084	no	no
chr1	63540305	8.698	20.116	no	no
chr1	63782847	11.294	4.728	yes	yes
chr1	63783312	13.966	6.548	yes	yes
chr1	63788100	12.52	6.606	no	yes
chr1	63788809	11.886	11.828	no	no
chr1	63789387	16.622	11.902	no	yes
chr1	63789743	10.96	9.838	no	yes
chr1	64240775	9.39	6.688	no	no
chr1	64936598	8.928	11.492	no	no
chr1	65775614	11.494	6.526	no	yes
chr1	65991424	10.71	17.03	no	no
chr1	66174835	8.722	21.084	no	no
chr1	66258883	25.62	29.79	no	no
chr1	66998886	12.546	16.38	no	no
chr1	66999782	14.236	18.658	no	no
chr1	67123042	8.352	4.66	no	no
chr1	67126988	8.984	11.082	no	no
chr1	67519053	9.18	6.452	no	yes
chr1	67774088	8.738	7.984	no	no
chr1	68697055	27.108	15.252	no	no
chr1	70034159	32.338	18.748	no	no
chr1	70035330	16.812	29.054	no	no
chr1	71513017	22.104	14.764	no	yes
chr1	71513591	9.722	16.784	no	yes
chr1	71514045	9.008	11.852	no	no
chr1	71728628	10.192	9.162	no	no
chr1	72748163	9.152	7.408	no	no
chr1	72749539	18.36	22.05	no	yes
chr1	72750961	7.306	9.202	no	no
chr1	75139460	8.194	13.676	no	no
chr1	75590440	9.358	14.032	no	no
chr1	75590918	9.688	19.152	no	no
chr1	75591270	8.766	20.27	no	no
chr1	75593845	13.472	17.496	no	no
chr1	75602304	35.336	26.784	no	no
chr1	75892687	7.036	8.394	no	no
chr1	76080616	28.708	30.034	no	no
chr1	76082206	13.186	24.392	no	no
chr1	76492410	8.66	7.656	no	no
chr1	78956683	26.51	15.47	no	no
chr1	82267393	70.458	30.398	no	yes
chr1	82268550	57.638	31.476	no	yes
chr1	84326574	8.042	4.79	no	yes
chr1	85358920	11.504	3.528	no	no
chr1	85514280	58.82	30.556	no	yes
chr1	85515449	13.544	18.124	no	no
chr1	86042845	12.656	5.1	no	yes
chr1	86621712	37.296	34.65	no	no
chr1	87381147	12.538	7.034	no	no
chr1	87597650	11.398	4.364	no	no
chr1	88928648	25.738	23.07	no	yes
chr1	90098920	20.18	9.688	no	yes
chr1	90570840	13.528	23.846	no	no
chr1	91172026	11.234	15.226	no	no
chr1	91172562	24.168	15.698	no	no
chr1	91176699	33.398	27.684	no	no
chr1	91179559	23.422	22.316	no	no
chr1	91181196	11.858	15.706	no	no
chr1	91182159	63.046	40.856	no	no
chr1	91183427	17.172	13.604	no	no
chr1	91184181	48.706	28.41	no	no
chr1	91190552	11.076	21.646	no	no
chr1	91191395	14.576	26.62	no	no
chr1	91192550	12.938	22.53	no	no
chr1	91195330	15.742	24.186	no	no
chr1	91196216	20.178	11.79	no	yes
chr1	91216279	7.79	13.794	no	no
chr1	91297634	10.504	11.542	no	no
chr1	91298330	10.522	12.396	no	no
chr1	91298946	8.884	9.72	no	no
chr1	91300598	14.29	16.672	no	no
chr1	91301774	12.146	18.086	no	no
chr1	91307230	8.08	5.628	no	no
chr1	91316988	11.74	6.668	no	no
chr1	91852977	153.742	126.794	no	yes
chr1	91870068	12.98	7.598	no	yes
chr1	92948689	12.542	18.034	no	no
chr1	92950354	24.834	31.148	no	no
chr1	92951427	28.646	23.734	no	yes
chr1	94147066	9.964	15.862	no	yes
chr1	96494848	7.254	5.508	no	no
chr1	98386441	18.134	10.848	no	yes
chr1	98386839	9.91	4.034	no	yes
chr1	98510468	15.718	42.912	no	no
chr1	98511270	8.112	22.812	no	no
chr1	98514057	12.732	7.61	no	no
chr1	99470044	44.592	33.792	no	no
chr1	99470734	26.236	24.944	no	no
chr1	99471451	15.26	13.45	no	no
chr1	99472249	8.57	11.096	no	no
chr1	99612506	12.122	12.93	no	no
chr1	99729831	24.616	23.26	no	yes
chr1	99860680	11.788	11.408	no	no
chr1	101700892	11.058	14.466	no	no
chr1	101702569	40.056	43.726	no	no
chr1	101703950	12.836	19.454	no	no
chr1	101705667	10.708	34.02	no	no
chr1	101706148	12.622	28.886	no	no
chr1	101715264	8.882	14.04	no	no
chr1	102204895	6.828	9.192	no	no
chr1	103574104	12.338	19.894	no	no
chr1	107683702	8.662	6.052	no	no
chr1	108507359	32.444	30.926	no	yes
chr1	108508320	13.55	24.494	no	yes
chr1	108742628	15.634	11.134	yes	yes
chr1	108743046	10.946	8.796	yes	yes
chr1	110007601	11.472	17.61	no	no
chr1	110009163	53.054	36.776	no	no
chr1	110010089	12.314	19.158	no	no
chr1	110015831	9.69	12.244	no	no
chr1	110612774	9.282	7.016	no	no
chr1	110627115	24.642	25.564	no	no
chr1	110693186	28.162	25.752	no	no
chr1	110753686	24.498	13.738	yes	no
chr1	111098753	17.608	12.072	no	no
chr1	111149607	99.43	50.65	no	no
chr1	111163167	14.888	26.734	no	no
chr1	111216685	25.624	33.094	no	no
chr1	111265133	13.96	25.386	no	no
chr1	111266767	14.466	21.424	no	no
chr1	111295840	10.392	12.956	no	no
chr1	112415625	15.086	16.22	no	no
chr1	112532948	14.85	4.766	no	yes
chr1	113050713	10.616	15.1	no	no
chr1	113051312	22.72	17.216	no	yes
chr1	114680482	10.244	22.888	no	no
chr1	114695440	45.428	23.048	no	no
chr1	114698542	10.03	17.474	no	no
chr1	114844056	9.562	12.388	no	no
chr1	115394722	8.684	21.288	no	no
chr1	115396944	9.858	30.45	no	no
chr1	115397852	28.024	30.306	no	no
chr1	115594615	12.674	14.922	no	no
chr1	115631690	10.148	19.698	no	no
chr1	115632372	7.964	11.428	no	no
chr1	115880577	28.916	34.312	no	no
chr1	116382147	16.15	20.352	no	yes
chr1	121138292	95.784	20.864	no	yes
chr1	121485195	238.75	157.184	no	no
chr1	143278801	15.63	17.88	no	no
chr1	143283786	20.082	27.704	no	no
chr1	144534009	39.546	8.922	yes	no
chr1	145039866	35.992	5.414	no	yes
chr1	145713541	12.256	3.904	no	no
chr1	146556340	16.562	9.682	no	yes
chr1	148855213	196.13	32.244	no	no
chr1	148901965	13.346	9.188	no	no
chr1	149069864	13.088	21.306	no	no
chr1	149137565	28.512	28.836	no	no
chr1	149145112	11.734	12.952	no	no
chr1	149147565	30.888	36.576	no	no
chr1	149149348	13.19	20.452	no	no
chr1	149156601	9.448	20.042	no	no
chr1	149162511	22.67	25.306	no	no
chr1	149170304	10.912	19.916	no	no
chr1	149174506	12.708	23.572	no	no
chr1	149174964	9.256	24.178	no	no
chr1	149186410	15.348	27.032	no	no
chr1	149192891	9.544	15.938	no	no
chr1	149193936	15.674	23.614	no	no
chr1	149194558	12.21	12.646	no	no
chr1	149333181	6.434	8.356	no	no
chr1	152081492	13.066	32.438	no	yes
chr1	152081940	22.578	24.356	no	yes
chr1	152083853	22.58	18.562	no	yes
chr1	152084857	24.386	32.864	no	no
chr1	152487875	16.956	23.828	no	no
chr1	152595881	11.074	14.978	no	no
chr1	152922250	12.868	20.386	no	no
chr1	153179139	9.818	14.232	no	no
chr1	153234371	54.304	27.648	no	no
chr1	153236183	9.784	20.868	no	no
chr1	153265567	12.194	20.718	no	no
chr1	153265959	12.93	16.97	no	no
chr1	153278408	11.31	23.306	no	no
chr1	153278954	13.948	24.864	no	no
chr1	153279652	14.808	28.78	no	no
chr1	153314029	9.25	12.014	no	no
chr1	153351523	7.584	10.88	no	no
chr1	153352236	11.982	21.572	no	no
chr1	153353155	19.266	32.466	no	no
chr1	153369539	10.344	19.828	no	no
chr1	153370598	12.662	12.28	no	no
chr1	153377378	6.982	10.538	no	no
chr1	153651179	57.034	37.388	no	no
chr1	153653455	13.31	11.326	no	no
chr1	154471626	10.766	9.046	no	no
chr1	154473207	19.204	19.742	no	no
chr1	154474354	50.934	22.938	no	no
chr1	154540359	12.312	4.292	no	yes
chr1	154544100	16.858	31.32	no	no
chr1	154680161	9.01	7.884	no	no
chr1	154733158	19.228	18.828	no	no
chr1	154776243	11.786	15.644	no	yes
chr1	154779673	10.87	17.644	no	no
chr1	154780196	13.888	13.706	no	no
chr1	154808950	11.542	11.594	no	no
chr1	154810414	13.344	17.972	no	no
chr1	154811174	11.604	12.622	no	no
chr1	154839893	12.758	13.138	no	no
chr1	154840533	14.37	27.422	no	no
chr1	154842108	16.784	29.778	no	no
chr1	155830184	13.774	18.462	no	no
chr1	156186378	120.882	107.162	no	no
chr1	156381074	10.924	11.902	no	no
chr1	156390481	36.864	34.876	no	no
chr1	156392446	11.264	17.446	no	no
chr1	156394996	9.502	15.878	no	no
chr1	156398876	10.156	14.01	no	no
chr1	156399680	9.292	23.676	no	no
chr1	156402484	10.466	19.36	no	no
chr1	156406172	61.342	37.788	no	no
chr1	156409834	10.22	16.188	no	no
chr1	156410722	10.658	20.792	no	no
chr1	156594967	47.41	37.13	no	no
chr1	156611252	21.04	29.242	no	no
chr1	156612173	45.142	29.154	no	no
chr1	156616559	12.62	19.12	no	no
chr1	156627385	17.156	4.91	no	no
chr1	156645542	10.714	17.578	no	no
chr1	156646861	37.414	33.218	no	no
chr1	156831011	41.51	37.508	no	no
chr1	156862150	14.954	18.476	no	yes
chr1	156863102	11.25	18.404	no	no
chr1	156863600	8.876	11.22	no	no
chr1	156872948	9.71	6.972	no	no
chr1	156874414	11.22	12.55	no	no
chr1	156874892	10.13	11.354	no	no
chr1	156878466	24.126	19.258	no	no
chr1	156890259	25.622	21.662	no	no
chr1	156892223	9.722	15.866	no	no
chr1	156892761	14.262	25.062	no	no
chr1	156893477	25.3	27.578	no	no
chr1	156894822	14.174	13.866	no	no
chr1	156897671	16.054	14.422	no	yes
chr1	157077256	13.198	19.044	no	no
chr1	157164882	14.566	13.778	no	no
chr1	157248516	11.716	17.07	no	no
chr1	157249632	12.392	11.268	no	no
chr1	157805782	8.414	6.728	no	no
chr1	157895162	10.908	16.178	no	no
chr1	157948893	9.422	23.34	no	no
chr1	157963147	9.71	15.392	no	no
chr1	157963551	15.95	18.758	no	no
chr1	157965296	8.184	10.906	no	no
chr1	157977510	14.278	18.026	no	no
chr1	157978163	8.772	9.946	no	no
chr1	158007925	8.768	14.146	no	no
chr1	158037462	10.69	12.634	no	no
chr1	158047758	10.234	9.43	no	no
chr1	158059456	13.462	17.202	no	no
chr1	158062948	13.676	21.572	no	no
chr1	158064076	14.05	19.72	no	no
chr1	158064463	11.814	17.246	no	no
chr1	158082979	7.936	23.916	no	yes
chr1	158083874	15.678	26.626	no	yes
chr1	158084024	15.05	21.41	no	no
chr1	158087964	12.04	15.138	no	no
chr1	158147620	7.614	5.172	no	no
chr1	158149543	11.628	19.21	no	no
chr1	158150866	38.198	39.356	no	no
chr1	159035085	8.78	7.54	no	no
chr1	159141096	10.438	17.9	no	no
chr1	159141655	18.852	18.168	no	no
chr1	159142836	8.866	16.552	no	no
chr1	159158339	13.262	17.642	no	no
chr1	160054138	18.102	5.01	no	yes
chr1	160370134	14.574	9.572	no	no
chr1	160370763	9.96	12.248	no	no
chr1	160371646	12.106	15.276	no	no
chr1	160372484	13.284	17.004	no	no
chr1	160382087	10.186	7.764	no	no
chr1	160385744	20.186	23.51	no	no
chr1	160388741	12.168	22.486	no	no
chr1	160389266	14.524	22.012	no	no
chr1	160390698	10.748	14.904	no	no
chr1	160647574	12.076	10.102	no	no
chr1	161228630	26.422	35.492	no	yes
chr1	161409821	11.176	5.392	no	yes
chr1	161993463	15.05	11.078	no	no
chr1	163379067	11.342	11.69	no	no
chr1	163392988	13.864	18.754	no	no
chr1	163662247	8.842	10.364	no	no
chr1	164077905	7.744	3.962	no	no
chr1	165087088	21.846	20.07	no	no
chr1	165205421	40.426	29.332	no	no
chr1	165322116	40.014	42.312	no	no
chr1	165323249	34.964	30.156	no	no
chr1	165412943	11.044	11.642	no	no
chr1	165414298	15.656	19.512	no	no
chr1	165910403	11.342	17.462	no	no
chr1	165910814	11.154	19.484	no	no
chr1	166133571	11.768	12.684	no	no
chr1	166134479	38.542	24.51	no	no
chr1	166766152	11.764	22.934	no	no
chr1	166766733	10.982	12.638	no	no
chr1	166944175	11.956	9.2	no	no
chr1	166944992	12.258	6.568	no	yes
chr1	166958656	7.738	4.426	no	no
chr1	170182925	9.858	10.85	no	no
chr1	170278880	11.516	10.428	no	no
chr1	170285488	11.576	16.416	no	no
chr1	170629463	38.232	29.77	no	no
chr1	170630512	19.912	36.506	no	no
chr1	170631489	15.18	25.394	no	no
chr1	170632432	15.554	23.486	no	no
chr1	170633822	80.58	44.75	no	no
chr1	170635997	12.374	22.034	no	no
chr1	170636825	12.25	18.48	no	no
chr1	170637661	26.122	12.306	no	no
chr1	170638253	16.274	14.812	no	no
chr1	170638891	16.014	15.784	no	no
chr1	170639561	9.792	13.216	no	no
chr1	170640532	15.554	18.466	no	no
chr1	170640827	13.11	16.122	no	no
chr1	170683211	12.534	18.244	no	no
chr1	171624759	12.322	9.33	no	no
chr1	171810216	9.942	19.84	no	no
chr1	171810875	23.34	20.752	no	no
chr1	175013179	12.016	24.576	no	no
chr1	175013833	10.026	14.794	no	no
chr1	175014624	13.732	10.092	no	no
chr1	175036360	9.736	13.904	no	no
chr1	175037036	14.954	10.546	no	no
chr1	175046815	12.632	24.582	no	no
chr1	175048802	29.466	28.292	no	no
chr1	175372401	14.486	25.606	no	no
chr1	175375409	14.642	22.04	no	no
chr1	175379313	9.154	8.674	no	no
chr1	175389128	10.298	20.284	no	no
chr1	175462943	20.654	22.432	no	no
chr1	175463685	15.308	18.652	no	no
chr1	175472916	11.928	18.102	no	no
chr1	175473583	13.614	22.292	no	no
chr1	175474375	23.224	29.254	no	no
chr1	175568360	27.196	43.802	no	no
chr1	175712369	9.466	8.478	no	no
chr1	176525367	12.668	19.474	no	no
chr1	176525890	11.372	19.804	no	no
chr1	176862413	8.446	21.512	no	no
chr1	176873104	11.36	20.722	no	no
chr1	176873593	14.84	29.252	no	no
chr1	176903556	8.29	19.488	no	no
chr1	176918397	12.132	8.416	no	no
chr1	177001738	28.174	29.35	no	no
chr1	177082035	13.792	18.01	no	no
chr1	177133517	31.224	36.526	no	no
chr1	177140440	29.546	32.306	no	no
chr1	177150756	14.418	18.512	no	yes
chr1	177250608	15.328	17.836	no	yes
chr1	177310110	12.248	24.294	no	no
chr1	177381538	9.508	11.422	no	no
chr1	179545261	27.378	25.836	no	no
chr1	179560884	11.802	6.386	no	yes
chr1	179610055	8.258	7.17	no	no
chr1	179712816	64.968	37.18	no	no
chr1	180198767	22.244	12.518	no	yes
chr1	180199999	41.998	35.696	yes	yes
chr1	180202770	36.854	38.956	no	no
chr1	180204124	53.472	40.082	no	no
chr1	180205907	15.058	19.926	no	no
chr1	180206657	10.158	18.968	no	no
chr1	180209046	11.574	17.78	no	no
chr1	180228892	11.286	17.752	no	no
chr1	180881463	44.256	27.45	no	no
chr1	180904357	10.05	12.844	no	no
chr1	181286544	13.452	21.996	no	no
chr1	181287604	36	29.678	no	no
chr1	181452059	34.424	25.61	no	no
chr1	181454968	27.636	26.5	no	no
chr1	181616693	12.986	17.946	no	no
chr1	181701523	16.502	20.572	no	no
chr1	181727273	12.588	29.086	no	no
chr1	181749991	10.228	15.588	no	no
chr1	181761129	11.176	14.992	no	no
chr1	181767889	19.028	30.694	no	no
chr1	181768412	16.774	22.288	no	no
chr1	182026172	11.982	9.942	no	no
chr1	182027115	11.7	9.746	no	no
chr1	183387541	19.63	22.784	no	no
chr1	185703461	28.878	20.754	no	yes
chr1	186238925	13.472	15.79	no	no
chr1	186649441	28.078	28.74	yes	yes
chr1	190068098	11.538	19.308	no	no
chr1	195732642	14.426	11.788	no	no
chr1	195916776	13.39	20.094	no	no
chr1	195917416	12.158	32.688	no	no
chr1	196578269	18.37	18.506	no	no
chr1	196579408	8.046	5.982	no	no
chr1	196825459	12.416	14.23	no	no
chr1	196847299	12.34	14.86	no	no
chr1	196866364	12.774	8.56	no	no
chr1	197332702	7.952	7.566	no	no
chr1	197885180	16.29	10.532	no	yes
chr1	198698031	7.708	6.756	no	no
chr1	199717073	16.842	21.074	no	no
chr1	199998571	27.522	25.194	no	no
chr1	200003240	12.81	18.874	no	no
chr1	200005234	26.578	31.774	no	no
chr1	200008794	49.074	26.846	no	yes
chr1	200030137	7.122	7.624	no	no
chr1	200045462	11.126	8.272	no	no
chr1	200860493	10.604	12.832	no	yes
chr1	201088544	10.394	6.638	no	no
chr1	201348108	11.978	4.666	no	no
chr1	201507924	14.94	6.382	no	yes
chr1	201915582	13.098	17.182	no	no
chr1	202162361	20.15	15.554	no	no
chr1	202162943	9.942	10.932	no	no
chr1	202163357	14.088	20.622	no	no
chr1	202182502	11.708	19.644	no	no
chr1	202183332	26.582	26.908	no	no
chr1	202183894	12.704	16.412	no	no
chr1	202612253	32.266	17.358	no	no
chr1	202613364	34.976	36.844	no	no
chr1	202614069	7.762	9.214	no	no
chr1	202618114	14.824	10.128	no	no
chr1	202620174	14.214	22.614	no	no
chr1	202620599	9.704	13.576	no	no
chr1	202674311	9.332	18.328	no	no
chr1	202674624	9.122	14.528	no	no
chr1	202679448	29.392	34.004	no	no
chr1	203058765	10.664	9.14	no	yes
chr1	203085602	13.18	18.084	no	no
chr1	203087057	19.994	21.468	no	no
chr1	203097273	22.29	24.158	no	yes
chr1	203134438	9.23	15.022	no	no
chr1	203316533	13.978	21.32	no	no
chr1	203424252	10.086	18.042	no	no
chr1	203429594	9.956	13.904	no	no
chr1	203433000	18.302	22.144	no	no
chr1	203435043	10.892	13.25	no	no
chr1	203483232	17.952	16.824	no	no
chr1	203484374	9.502	19.074	no	no
chr1	203539047	12.4	12.448	no	no
chr1	203555248	13.188	22.936	no	no
chr1	203555830	16.844	20.458	no	no
chr1	203566729	12.004	11.006	no	no
chr1	203619615	7.366	8.524	no	yes
chr1	204042920	18.168	4.97	yes	yes
chr1	204156031	15.792	18.8	no	no
chr1	204588097	14.356	20.896	no	no
chr1	204588951	11.524	13.866	no	no
chr1	204597789	9.074	8.956	no	no
chr1	204633219	12.696	13.506	no	no
chr1	204653371	10.6	12.014	no	no
chr1	204654233	19.92	16.256	no	no
chr1	204654909	22.12	27.708	no	yes
chr1	204681501	15.376	18.624	no	no
chr1	204797552	10.752	13.272	no	yes
chr1	204921259	14.26	17.408	no	no
chr1	204950868	11.492	13.09	no	no
chr1	204955119	9.424	12.798	no	no
chr1	204960539	11.254	14.886	no	no
chr1	204999763	8.724	16.938	no	no
chr1	205000314	13.836	17.146	no	no
chr1	205011247	15.032	21.444	no	no
chr1	205011978	10.354	13.756	no	no
chr1	205012682	14.806	16.982	no	no
chr1	205013157	11.234	21.558	no	no
chr1	205022259	8.614	11.508	no	no
chr1	205197872	9.012	5.368	no	yes
chr1	205425821	63.638	35.908	no	no
chr1	205426794	8.866	11.654	no	no
chr1	206223904	11.052	7.728	no	no
chr1	207626417	13.548	19.812	no	no
chr1	207628044	73.402	54.556	no	yes
chr1	207642415	11.12	26.906	no	no
chr1	207670436	18.37	13.574	no	no
chr1	207680809	7.562	16.272	no	no
chr1	207842956	16.692	26.86	no	no
chr1	208084200	15.832	16.844	no	no
chr1	208441258	26.472	30.58	no	no
chr1	208442426	13.44	29.864	no	no
chr1	208606616	12.296	16.544	no	no
chr1	209000034	10.526	6.278	no	no
chr1	209381519	21.43	19.654	no	no
chr1	209405772	17.636	33.034	no	no
chr1	209406419	12.132	24.094	no	no
chr1	209759250	15.442	17.236	no	no
chr1	210062478	10.358	13.896	no	no
chr1	210111166	13.09	9.51	no	no
chr1	210112052	17.264	25.062	no	no
chr1	210406832	36.114	29.59	no	yes
chr1	210407819	9.942	16.666	no	yes
chr1	210424068	10.352	12.234	no	no
chr1	210424745	15.586	12.81	no	yes
chr1	210425180	14.98	19.746	no	yes
chr1	210465766	20.248	16.936	no	yes
chr1	210484765	12.524	10.044	no	no
chr1	210485317	12.42	13.82	no	no
chr1	210486027	9.01	12.366	no	no
chr1	210486914	11.686	14.77	no	no
chr1	210502729	12.878	4.254	no	yes
chr1	210827285	19.438	32.438	yes	no
chr1	211284793	13.174	24.052	no	no
chr1	211306709	35.924	33.066	no	no
chr1	212863389	15.026	24.924	no	no
chr1	212864172	12.45	18.758	no	no
chr1	212871927	12.128	18.376	no	no
chr1	212872879	32.39	21.474	no	no
chr1	212873755	28.038	38.282	no	no
chr1	212874432	13.772	22.77	no	yes
chr1	213124137	16.994	4.08	no	yes
chr1	213579222	10.944	13.472	no	no
chr1	213590317	10.14	19.83	no	no
chr1	213591684	13.146	15.238	no	no
chr1	213597215	11.116	13.764	no	no
chr1	213598228	14.922	22.07	no	no
chr1	213599142	13.606	22.348	no	no
chr1	213599580	12.504	23.14	no	no
chr1	213829883	8.906	8.604	no	no
chr1	213901483	8.384	16.268	no	no
chr1	213956697	10.116	13.556	no	no
chr1	214078875	11.936	18.172	no	no
chr1	214151166	9.036	14.968	no	no
chr1	214153210	17.232	24.636	no	no
chr1	214155470	10.754	13.874	no	no
chr1	214156696	41.866	35.244	no	no
chr1	214158840	31.114	37.18	no	no
chr1	214160866	11.52	5.92	no	no
chr1	214162215	27.078	24.564	no	no
chr1	214171115	30.638	35.624	no	no
chr1	214192982	14.65	18.49	no	no
chr1	214206385	8.8	15.272	no	no
chr1	214239592	13.738	19.074	no	no
chr1	214250512	18.306	17.564	no	no
chr1	214341582	10.85	17.388	no	no
chr1	214359027	9.77	22.334	no	no
chr1	214360782	57.7	35.41	no	no
chr1	214361494	14.636	16.822	no	no
chr1	215254151	8.308	10.096	no	no
chr1	215256124	46.016	37.852	no	yes
chr1	215256813	40.228	22.898	no	yes
chr1	215259637	12.078	19.526	no	no
chr1	215260061	14.296	20.778	no	no
chr1	215265673	10.728	12.808	no	no
chr1	215567524	13.516	22.248	no	no
chr1	215568108	13.054	28.12	no	no
chr1	216136717	10.12	12.006	no	no
chr1	216137310	12.462	14.16	no	no
chr1	216896911	19.894	23.646	no	no
chr1	217262795	9	16.046	no	yes
chr1	217263242	15.468	15.274	no	yes
chr1	217309047	47.9	20.906	no	yes
chr1	217311697	21.734	25.642	no	no
chr1	217313848	16.512	21.6	no	no
chr1	218093256	10.466	13.554	no	no
chr1	218093645	10.71	16.452	no	no
chr1	218098516	16.804	28.008	no	no
chr1	218098836	11.046	19.466	no	no
chr1	218104924	11.392	11.392	no	no
chr1	218105436	12.384	16.028	no	no
chr1	218330237	14.828	17.84	no	no
chr1	218338075	70.416	41.686	no	no
chr1	218339949	12.55	14.762	no	no
chr1	218387491	8.146	17.7	no	no
chr1	218518568	12.05	12.142	no	yes
chr1	218519453	13.814	18.834	yes	yes
chr1	219163559	9.99	10.068	no	no
chr1	219834442	11.576	6.628	no	yes
chr1	223567264	23.926	20.88	no	no
chr1	224804368	37.282	21.438	no	yes
chr1	228135169	12.596	13.214	yes	yes
chr1	228136222	9.256	14.604	no	yes
chr1	228193457	20.886	19.152	no	no
chr1	228194025	27.104	24.846	no	no
chr1	228196414	23.726	20.444	no	no
chr1	228197308	7.848	9.984	no	no
chr1	228225954	16.774	10.75	no	no
chr1	228226548	8.628	17.084	no	no
chr1	228261217	9.748	8.442	no	no
chr1	228345181	11.208	15.838	no	no
chr1	228346062	32.012	22.372	no	no
chr1	228346819	16.454	22.706	no	no
chr1	228348416	9.972	8.786	no	no
chr1	228350275	11.65	6.964	no	no
chr1	228395094	9.758	8.964	no	no
chr1	228395885	8.24	7.468	no	no
chr1	228475076	8.778	7.61	no	no
chr1	228475467	8.268	6.676	no	no
chr1	228479382	9.534	17.808	no	no
chr1	228480504	9.876	14.992	no	no
chr1	228481381	11.348	13.012	no	no
chr1	228495130	19.204	21.528	no	no
chr1	228503490	13.152	16.502	no	no
chr1	228504643	18.06	14.964	no	no
chr1	228507001	10.474	11.83	no	no
chr1	228509132	9.68	23.752	no	no
chr1	228509523	13.994	24.51	no	no
chr1	228559204	9.03	10.122	no	yes
chr1	228559714	8.382	7.84	no	no
chr1	228645449	10.514	4.7	no	yes
chr1	228647104	9.476	7.774	no	no
chr1	228651658	13.902	20.75	no	yes
chr1	228652460	11.742	25.982	no	no
chr1	228653290	13.15	15.802	no	no
chr1	228657305	10.332	18.628	no	no
chr1	228657767	13.008	19.274	no	no
chr1	228658745	9.97	19.616	no	no
chr1	228743198	26.454	28.352	no	no
chr1	228891235	10.91	14.114	no	no
chr1	229566810	12.816	14.454	no	no
chr1	229567445	9.978	16.912	no	no
chr1	229567857	11.912	21.836	no	no
chr1	229568668	21.45	20.168	no	no
chr1	229570181	16.632	21.372	no	no
chr1	229570729	11.624	13.534	no	no
chr1	230468558	10.468	16.616	no	no
chr1	230523901	9.99	8.05	no	no
chr1	230528509	10.114	14.844	no	no
chr1	230529193	7.122	14.386	no	no
chr1	230552598	10.878	11.222	no	no
chr1	230558409	11.008	20.528	no	no
chr1	230561259	22.814	25.472	no	no
chr1	230562496	14.992	4.254	no	yes
chr1	231174911	12.992	24.494	no	no
chr1	231175502	24.97	16.054	no	yes
chr1	231176837	11.314	12.466	no	no
chr1	231232615	9.612	9.738	no	no
chr1	231234588	10.084	9.37	no	no
chr1	231295905	11.648	25.062	no	no
chr1	231298277	34.776	22.352	no	yes
chr1	231320219	12.002	20.056	no	no
chr1	231321295	12.622	32.426	no	no
chr1	231321740	14.038	29.642	no	no
chr1	231322211	11.936	22.188	no	no
chr1	231323869	12.864	30.416	no	no
chr1	231762435	10.23	17.542	no	yes
chr1	231762789	15.278	23.57	no	yes
chr1	232765249	14.688	5.032	no	yes
chr1	233601958	9.428	11.382	no	no
chr1	234040872	40.742	27.746	no	no
chr1	235812901	15.792	12.988	no	no
chr1	235813247	8.9	7.924	no	no
chr1	236228367	16.224	17.126	no	no
chr1	236849314	17.402	37.766	no	no
chr1	236850367	17.618	29.754	no	no
chr1	236872958	7.978	11.08	no	no
chr1	236914931	11.642	12.82	no	no
chr1	237206539	29.148	34.972	no	no
chr1	237218303	12.814	26.116	no	no
chr1	237592817	7.58	10.37	no	no
chr1	239550459	29.462	25.734	no	no
chr1	239551609	10.95	11.098	no	no
chr1	240118400	9.894	11.56	no	no
chr1	240256072	48.844	24.548	no	no
chr1	240775442	12.428	15.042	no	no
chr1	241519663	19.948	20.356	no	no
chr1	241520300	17.942	20.74	no	no
chr1	241521418	8.1	18.336	no	no
chr1	241587381	19.82	14.492	no	no
chr1	241587939	12.73	13.3	no	no
chr1	242221011	9.634	16.632	no	no
chr1	242687412	36.436	28.604	no	no
chr1	242688314	24.628	21.932	no	no
chr1	242689647	13.984	21.136	no	no
chr1	244012854	29.536	27.76	no	no
chr1	244014414	22.062	33.69	no	yes
chr1	244080548	27.086	43.176	no	no
chr1	244081485	11.976	20.054	no	no
chr1	244089786	8.258	12.742	no	no
chr1	244121732	8.688	10.546	no	no
chr1	244122275	9.55	14.314	no	no
chr1	244122629	10.264	18.472	no	no
chr1	244199817	11.97	23.184	no	no
chr1	244200781	10.218	15.02	no	no
chr1	244238183	12.572	23.634	no	no
chr1	244255866	11.504	14.908	no	no
chr1	244262942	13.658	39.622	no	no
chr1	244264524	12.566	23.91	no	no
chr1	244265542	9.758	16.986	no	no
chr1	244266011	11.936	25.252	no	no
chr1	244268755	10.38	25.286	no	no
chr1	244270045	16.216	16.956	no	no
chr1	244270686	9.256	10.262	no	no
chr1	244271843	10.29	25.428	no	no
chr1	244274868	10.918	20.85	no	no
chr1	244281456	9.558	15.644	no	no
chr1	244301864	9.5	23.274	no	no
chr1	244303367	10.936	25.418	no	no
chr1	244365148	11.01	19.67	no	no
chr1	244366444	10.136	9.56	no	no
chr1	244386546	9.684	12.85	no	no
chr1	244395098	14.092	11.734	no	yes
chr1	245319506	23.326	18.988	no	yes
chr1	245581526	11.566	28.178	no	no
chr1	245582888	13.422	21.446	no	no
chr1	245583406	9.888	24.292	no	no
chr1	245604378	10.592	22.618	no	no
chr1	245605314	11.938	20.268	no	no
chr1	245626749	12.154	23.098	no	no
chr1	245629230	8.784	17.478	no	no
chr1	245711482	12.662	16.612	no	no
chr1	245713913	11.314	26.588	no	no
chr1	245722185	9.292	8.068	no	no
chr1	245848611	10.194	9.49	no	no
chr1	245851357	18.998	24.49	no	no
chr1	247274501	8.718	6.682	no	no
chr1	247275403	11.88	12.358	no	no
chr1	247455161	9.942	11.288	no	no
chr1	247537438	7.112	7.18	no	no
chr1	247579762	11.012	12.562	no	no
chr1	247582069	10.356	16.182	no	no
chr1	247594714	12.982	21.972	no	no
chr1	247596642	10.628	16.686	no	no
chr1	247597400	10.222	17.422	no	no
chr1	247611906	11.324	21.318	no	no
chr1	247614750	17.254	32.044	no	no
chr1	247617583	13.936	23.392	no	no
chr1	247629295	8.968	12.904	no	no
chr1	247681592	19.766	24.442	no	no
chr1	247694215	18.498	20.69	no	no
chr1	248020602	14.386	20.994	no	no
chr1	248021217	9.956	11.958	no	no
chr1	248100417	7.642	6.88	no	no
chr1	248469687	19.4	13.272	no	no
chr1	248520591	7.804	9.07	no	no
chr1	248845274	9.968	18.28	no	no
chr1	248855112	11.856	22.446	no	no
chr1	248855464	11.868	29.848	no	no
chr1	248903234	11.944	11.736	no	no
chr1	248905401	7.094	8.048	no	no
chr10	1205732	11.336	12.94	no	no
chr10	1208866	9.83	21.508	no	no
chr10	1212372	10.918	19.918	no	no
chr10	1212853	12.086	24.56	no	no
chr10	1213389	8.77	14.99	no	no
chr10	1215370	13.324	20.712	no	no
chr10	1216029	14.554	23.252	no	no
chr10	1224204	9.254	12.97	no	no
chr10	1224510	9.184	13.754	no	no
chr10	1225464	9.216	5.748	no	no
chr10	1229863	19.152	25.458	no	no
chr10	1230941	25.704	21.678	no	no
chr10	1231680	12.552	17.522	no	no
chr10	1232594	12.114	18.818	no	no
chr10	1233262	10.614	17.914	no	no
chr10	1239077	10.978	11.122	no	no
chr10	1241697	9.068	20.968	no	no
chr10	1244786	12.62	15.078	no	no
chr10	1246166	16.042	25.256	no	no
chr10	1247439	7.672	8.978	no	no
chr10	1249449	8.584	7.47	no	no
chr10	1250811	11.756	16.672	no	no
chr10	1251716	19.594	16.764	no	no
chr10	1256514	11.506	16.978	no	no
chr10	1263445	10.542	16.304	no	no
chr10	1274697	7.72	5.598	no	no
chr10	1281206	21.012	17.526	no	no
chr10	1282671	23.328	31.184	no	no
chr10	1283933	19.938	26.068	no	no
chr10	1285856	9.118	12.774	no	no
chr10	1290625	7.902	13.708	no	no
chr10	1331814	11.28	20.468	no	no
chr10	1332654	9.824	15.734	no	no
chr10	1334151	12.68	18.226	no	no
chr10	1334730	10.192	12.35	no	no
chr10	1340722	8.104	12.012	no	no
chr10	1357185	9.706	9.636	no	no
chr10	1358511	9.424	10.326	no	no
chr10	1359073	7.25	7.064	no	no
chr10	1381310	12.276	14.498	no	no
chr10	1386936	7.994	13.964	no	no
chr10	1389885	9.63	17.938	no	no
chr10	1404871	11.872	18.466	no	no
chr10	1405794	7.528	12.362	no	no
chr10	1416787	12.264	14.008	no	no
chr10	1417428	8.768	13.93	no	no
chr10	1421959	10.694	12.356	no	no
chr10	1425231	9.626	14.29	no	no
chr10	1437530	8.906	8.352	no	no
chr10	1438675	8.972	10.504	no	no
chr10	1442671	10.746	10.31	no	no
chr10	1443388	9.644	12.23	no	no
chr10	1454441	7.466	9.138	no	no
chr10	1455136	9.202	18.238	no	no
chr10	1455820	9.446	8.332	no	no
chr10	1456066	10.296	11.04	no	no
chr10	1563561	11.494	12.614	no	no
chr10	1599520	9.132	9.378	no	no
chr10	1607225	7.112	7.93	no	no
chr10	1638815	11.568	15.364	no	no
chr10	1645655	8.78	8.922	no	no
chr10	1676191	8.968	12.052	no	no
chr10	1704157	12.194	20.222	no	no
chr10	1705009	15.9	17.304	no	no
chr10	1707076	10.13	15.054	no	no
chr10	1707702	12.92	17.546	no	no
chr10	1708190	10.352	12.212	no	no
chr10	1708737	10.738	21.192	no	no
chr10	1712893	13.858	9.4	no	no
chr10	1713833	12.73	19.582	no	no
chr10	1714603	18.69	21.808	no	no
chr10	1715873	10.554	11.296	no	no
chr10	1721237	9.99	15.132	no	no
chr10	1722019	7.884	20.494	no	no
chr10	1724453	8.792	19.862	no	no
chr10	1725123	11.278	16.566	no	no
chr10	1725398	10.722	14.668	no	no
chr10	1725950	10.648	20.912	no	no
chr10	1726277	8.318	16.362	no	no
chr10	1758229	16.308	15.24	no	yes
chr10	1760595	8.198	20.562	no	no
chr10	1775023	11.734	8.81	no	no
chr10	1778059	10.776	13.188	no	no
chr10	1779511	38.546	22.746	no	no
chr10	1782058	13.174	20.028	no	no
chr10	1788191	9.872	15.052	no	no
chr10	1807291	6.882	12.432	no	no
chr10	1828856	13.87	15.884	no	no
chr10	1851639	13.138	12.026	no	no
chr10	1877384	6.262	19.034	no	no
chr10	1889535	10.702	21.84	no	no
chr10	1975245	9.06	10.316	no	no
chr10	1994895	8.76	18.278	no	no
chr10	2005857	9.268	21.324	no	no
chr10	2006792	14.218	15.762	no	no
chr10	2007160	9.418	12.084	no	no
chr10	2012198	6.63	16.704	no	no
chr10	2188426	7.92	10.38	no	no
chr10	2482212	7.336	8.48	no	no
chr10	2568377	9.768	17.116	no	no
chr10	2661114	7.81	6.45	no	no
chr10	2815172	25.684	23.522	no	no
chr10	2872562	7.608	7.25	no	no
chr10	2932419	8.244	15.838	no	no
chr10	2938063	8.646	14.72	no	no
chr10	2942927	9.144	16.954	no	no
chr10	2945478	7.944	17.954	no	no
chr10	2964654	15.5	18.918	no	no
chr10	2965813	8.814	15.06	no	no
chr10	2977246	9.364	8.994	no	no
chr10	2978485	26.67	23.534	no	no
chr10	2979346	6.982	13.628	no	no
chr10	3062765	9.532	27.014	no	no
chr10	3063229	22.084	23.542	no	no
chr10	3108880	8.02	9.84	no	no
chr10	3109373	11.192	3.86	no	no
chr10	3110870	33.042	17.796	no	yes
chr10	3111726	7.49	10.196	no	no
chr10	3118471	6.3	10.278	no	no
chr10	3245585	8.808	8.272	no	no
chr10	3250950	17.832	26.816	no	no
chr10	3279952	9.884	14.354	no	no
chr10	3281941	12.832	8.196	no	no
chr10	3282457	9.144	12.44	no	no
chr10	3284134	16.77	18.712	no	no
chr10	3298879	7.792	14.052	no	no
chr10	3300196	12.222	27.472	no	no
chr10	3312080	11.924	13.652	no	no
chr10	3322564	9.632	13.736	no	no
chr10	3362712	9.828	24.122	no	no
chr10	3378098	8.672	7.478	no	no
chr10	3407247	9.682	18.674	no	no
chr10	3418213	8.486	13.66	no	no
chr10	3440376	13.944	20.098	no	no
chr10	3465818	12.512	19.49	no	no
chr10	3466415	10.174	21.936	no	no
chr10	3536604	11.95	20.004	no	no
chr10	3559368	14.298	17.166	no	no
chr10	3560259	8.462	15.552	no	no
chr10	3689438	10.906	10.59	no	no
chr10	3708593	10.118	15.688	no	no
chr10	3718648	7.742	11.248	no	no
chr10	3725677	8.028	11.04	no	no
chr10	3772574	10.07	23.966	no	no
chr10	3801973	15.286	32.312	no	no
chr10	3802472	13.512	25.66	no	no
chr10	3805677	11.816	20.192	no	no
chr10	3807176	10.552	17.006	no	no
chr10	4128887	9.52	18.286	no	no
chr10	4248354	9.646	16.036	no	no
chr10	4251305	10.454	20.14	no	no
chr10	4300328	12.756	27.454	no	no
chr10	4500099	9.676	13.78	no	no
chr10	4650114	8.942	17.258	no	no
chr10	4868861	22.228	15.544	no	yes
chr10	6117280	10.588	17.082	no	no
chr10	6171277	8.352	6.076	no	no
chr10	6176583	9.832	12.888	no	no
chr10	6243738	9.57	6.502	no	yes
chr10	6244934	16.816	6.592	no	yes
chr10	6246160	18.346	19.834	no	yes
chr10	6379534	9.152	3.934	no	no
chr10	6490172	8.05	11.674	no	no
chr10	6530895	8.836	10.132	no	no
chr10	6531855	16.364	23.866	no	no
chr10	6533635	9.732	16.774	no	no
chr10	6533983	9.716	11.406	no	no
chr10	6557152	9.478	13.612	no	no
chr10	6577797	10.574	13.024	no	no
chr10	6578962	7.764	12.952	no	no
chr10	6612131	10.684	20.64	no	no
chr10	6622017	12.052	10.064	no	no
chr10	6622542	11.614	7.676	no	no
chr10	6625672	8.212	11.77	no	no
chr10	6636441	6.822	7.782	no	no
chr10	6679648	9.188	12.308	no	no
chr10	6708047	9.84	8.4	no	no
chr10	7450745	18.012	16.648	no	yes
chr10	7451579	16.64	18.294	no	no
chr10	7452446	11.278	11.654	no	no
chr10	7453259	13.514	10.818	no	yes
chr10	7455028	26.066	32.038	no	no
chr10	7483310	8.698	14.5	no	no
chr10	7505366	9.7	12.812	no	no
chr10	7517398	7.286	8.374	no	no
chr10	7574993	8.55	16.848	no	no
chr10	7575405	12.044	12.884	no	no
chr10	7593731	7.354	11.922	no	no
chr10	7618628	13.39	27.274	no	no
chr10	7621958	7.942	22.77	no	no
chr10	7625614	6.898	12.736	no	no
chr10	7628388	9.336	15.362	no	no
chr10	7629578	9.968	13.716	no	no
chr10	7638251	9.806	10.184	no	no
chr10	7663005	7.134	10.758	no	no
chr10	7679155	13.514	26.256	no	no
chr10	7707728	9.128	19.972	no	no
chr10	7708708	13.356	23.644	no	no
chr10	7765017	12.504	23.398	no	no
chr10	8076057	13.694	26.898	no	no
chr10	8077141	15.478	21.748	no	no
chr10	8077995	12.638	29.272	no	no
chr10	8079431	18.84	26.704	no	no
chr10	8080192	19.796	19.892	no	no
chr10	8081224	12.258	18.374	no	no
chr10	8084204	22.294	29.614	no	no
chr10	8085309	26.02	26.582	no	no
chr10	8086530	8.764	11.252	no	no
chr10	8087152	24.456	27.676	no	yes
chr10	8090293	27.932	30.7	no	no
chr10	8092451	59.97	29.922	no	yes
chr10	8095364	24.416	25.808	no	yes
chr10	8096982	17.712	19.854	no	yes
chr10	8103933	7.322	18.516	no	no
chr10	8105845	21.86	21.614	no	no
chr10	8114387	11.632	25.216	no	no
chr10	8115638	9.266	12.038	no	no
chr10	8121450	9.412	11.476	no	no
chr10	8125446	10.492	19.344	no	no
chr10	8374567	13.658	17.892	no	yes
chr10	9449158	9.152	14.866	no	no
chr10	10840629	7.838	12.374	no	no
chr10	11049740	7.928	13.864	no	no
chr10	11059455	24.95	19.972	no	no
chr10	11060172	15.73	8.79	no	no
chr10	11060812	10.446	12.504	no	no
chr10	11205076	8.532	15.134	no	no
chr10	11207710	33.728	29.298	no	no
chr10	11208920	7.82	10.95	no	no
chr10	11213857	10.462	10.486	no	no
chr10	11315032	12.276	15.278	no	no
chr10	11317837	10.964	17.204	no	no
chr10	11322238	13.444	27.824	no	no
chr10	11332307	10.816	15.832	no	no
chr10	11339303	8.622	23.206	no	no
chr10	11343873	12.552	14.384	no	no
chr10	11344339	12.572	13.486	no	no
chr10	11357153	9.814	13.42	no	no
chr10	11357901	15.054	26.096	no	no
chr10	11377419	11.66	15.886	no	no
chr10	11381945	10.89	13.308	no	no
chr10	11382673	8.436	14.11	no	no
chr10	11386352	13.59	18.366	no	no
chr10	11435618	14.326	14.834	no	no
chr10	11479759	14.908	18.952	no	no
chr10	11483450	10.304	18.074	no	no
chr10	12392331	16.778	25.558	no	yes
chr10	12393786	9.416	8.598	no	no
chr10	12799560	6.588	11.486	no	no
chr10	12872913	7.696	15.582	no	no
chr10	12875387	10.28	17.87	no	no
chr10	12876339	14.41	21.12	no	no
chr10	12876904	10.978	14.588	no	no
chr10	12940176	12.796	18.946	no	no
chr10	13043351	24.884	17.778	no	no
chr10	13043995	11.504	9.27	no	no
chr10	13425390	16.684	15.144	no	yes
chr10	13482521	14.056	13.164	no	no
chr10	13570121	22.334	23.686	no	no
chr10	13571429	16.612	20.842	no	no
chr10	13572054	12.536	19.118	no	no
chr10	13580887	9.536	9.6	no	no
chr10	13583112	9.842	19.622	no	no
chr10	13701354	7.976	4.144	no	no
chr10	13789902	9.104	18.752	no	no
chr10	13868789	9.506	6.602	no	no
chr10	13933522	29.38	21.568	no	no
chr10	13934114	16.184	14.536	no	no
chr10	13996706	8.818	10.394	no	no
chr10	14011206	11.16	18.092	no	no
chr10	14012795	10.06	14.374	no	no
chr10	14215547	10.49	15.702	no	no
chr10	14216296	14.366	21.184	no	yes
chr10	14282524	9.474	15.478	no	no
chr10	14372063	9.554	11.88	no	no
chr10	15412398	8.73	10.01	no	no
chr10	15761551	19.536	23.018	no	no
chr10	15932194	6.74	8.606	no	no
chr10	17270742	10.672	14.706	yes	no
chr10	17271455	26.85	15.512	yes	no
chr10	17495879	31.898	27.062	no	yes
chr10	17496661	20.38	14.05	no	yes
chr10	17659218	14.302	7.512	yes	yes
chr10	17659753	9.154	21.084	yes	yes
chr10	18239881	7.77	16.348	no	no
chr10	18429830	8.664	4.802	no	yes
chr10	20104651	10.672	10.988	no	yes
chr10	20105848	11.768	4.204	no	yes
chr10	21785535	9.518	7.414	no	yes
chr10	21786025	18.642	9.896	no	yes
chr10	22611118	52.752	22.91	no	yes
chr10	22625560	8.452	17.542	no	no
chr10	23002255	12.554	3.608	no	no
chr10	23460367	9.66	7.928	no	no
chr10	23461373	11.108	14.81	no	no
chr10	23462292	20.544	18.26	no	no
chr10	23480246	17.11	14.55	no	no
chr10	23481504	13.464	17.622	no	no
chr10	23482354	19.158	23.36	no	no
chr10	23484257	13.782	21.87	no	no
chr10	23484764	11.74	8.262	no	no
chr10	23486530	8.61	10.72	no	no
chr10	23487890	22.298	10.04	no	no
chr10	23489917	8.508	17.372	no	no
chr10	23507137	7.224	6.872	no	no
chr10	23620593	14.246	20.26	no	no
chr10	23982620	8.658	19.73	no	no
chr10	23983031	9.242	23.24	no	no
chr10	23983848	25.692	22.98	no	no
chr10	25463519	12.556	4.452	no	yes
chr10	25464950	10.496	11.812	no	no
chr10	26223932	23.666	21.844	no	no
chr10	26461449	6.762	7.222	no	no
chr10	26500999	18.34	18.892	no	no
chr10	26506663	53.298	22.676	no	no
chr10	26680783	8.76	18.73	no	no
chr10	26681256	8.794	17.618	no	no
chr10	26727884	17.338	15.436	no	yes
chr10	26849788	8.15	7.794	no	no
chr10	26855959	10.142	13.608	no	no
chr10	26856431	12.424	14.77	no	no
chr10	26856910	7.922	11.61	no	no
chr10	26877699	9.23	15.408	no	no
chr10	26881917	6.91	6.516	no	no
[truncated: 20,044 more rows]

## Sheet: solo peaks
Suppl. Table 1B: 4603 EZH2 solo peaks in abl. Genomic loci are in hg19.
chrom	peak summit	EZH2 intensity	H3K27me3 intensity	Overlap with E2F1 sites in Hela	Overlap with E2F1 sites in MCF7
chr1	852931	13.09	0.306	no	yes
chr1	878542	7.576	1.686	no	no
chr1	879354	7.29	1.392	no	no
chr1	901889	11.58	0	no	yes
chr1	911767	13.758	0.618	no	no
chr1	934770	8.508	0.98	no	yes
chr1	1051721	7.284	0.446	no	yes
chr1	1057580	7.084	0.756	no	no
chr1	1100029	10.098	0.892	no	no
chr1	1117979	7.704	1.592	no	no
chr1	1172746	8.36	3.362	no	no
chr1	1173158	11.312	1.242	no	no
chr1	1227241	15.66	3.402	no	no
chr1	1243620	10.956	0	yes	yes
chr1	1244588	11.464	0.326	no	yes
chr1	1259785	7.92	0	no	yes
chr1	1269426	9.402	1.32	no	no
chr1	1290906	6.936	2.628	no	no
chr1	1294003	9.4	2	no	no
chr1	1294370	12.186	3.4	no	no
chr1	1310587	11.366	0.292	no	yes
chr1	1335044	12.856	0	no	yes
chr1	1335600	18.204	1.072	no	no
chr1	1341883	8.642	1.35	no	no
chr1	1342728	12.066	0	no	yes
chr1	1368694	10.762	0	no	yes
chr1	1447208	9.144	0.91	yes	yes
chr1	1550587	8.49	0	no	yes
chr1	1655945	8.86	0	no	yes
chr1	1710442	9.546	0.736	no	yes
chr1	1826198	8.744	0.096	no	no
chr1	1850523	11.364	0.746	no	yes
chr1	1875583	11.052	1.402	no	no
chr1	1891633	12.16	3.308	no	no
chr1	1976600	10.802	2.664	no	no
chr1	1980933	10.216	1.706	no	no
chr1	1982361	8.456	0.27	no	no
chr1	2160979	11.232	0.01	no	yes
chr1	2313354	8.864	1.148	no	no
chr1	2347946	14.18	0.042	no	no
chr1	2438421	8.656	2.49	no	no
chr1	2457679	10.092	0	no	yes
chr1	3566547	10.426	0.684	no	yes
chr1	3566828	8.546	2.892	no	yes
chr1	3625685	12.25	3.302	no	no
chr1	3692839	8.318	0	no	no
chr1	3713021	8.468	0.756	no	yes
chr1	3817584	10.632	0.584	no	yes
chr1	4712800	10.926	3.488	no	no
chr1	6052167	9.642	0	no	no
chr1	6259231	9.694	0.292	no	no
chr1	6614629	10.132	0.502	no	no
chr1	6844503	9.818	0	no	yes
chr1	8021520	14.548	0.292	no	yes
chr1	8319321	20.778	0.534	no	no
chr1	8409101	9.908	1.42	no	no
chr1	8908980	9.368	0.584	no	no
chr1	8938800	10.626	0	yes	yes
chr1	9222112	11.578	1.058	no	no
chr1	9242514	11.068	0.702	no	no
chr1	9496536	11.884	0	no	no
chr1	9613955	11.916	0.378	no	no
chr1	9687264	8.792	1.228	no	yes
chr1	9903035	18.134	0.544	no	no
chr1	10003347	11.382	0.206	no	yes
chr1	10270512	8.372	0	no	yes
chr1	10458663	13.826	0.292	no	yes
chr1	10459247	12.884	0.292	no	yes
chr1	10490494	14.048	0	yes	yes
chr1	10532475	8.95	0.884	no	no
chr1	10696223	14.458	1.062	no	no
chr1	10856797	13.576	0.93	no	yes
chr1	11113529	19.27	1.634	no	no
chr1	11741159	9.276	0	yes	yes
chr1	11812536	8.652	1.922	no	no
chr1	11968192	15.02	0	no	no
chr1	11969892	10.168	0	no	no
chr1	12040429	10.384	0.406	yes	yes
chr1	15064909	16.824	0	no	no
chr1	16840770	16.114	0.292	no	no
chr1	17222700	11.86	0	no	no
chr1	17231625	31.992	0	no	no
chr1	19536859	7.456	0.072	no	yes
chr1	19578149	51.168	0.366	no	yes
chr1	21058848	7.132	3.092	no	no
chr1	21960754	7.874	0	no	no
chr1	23345808	9.49	0.124	no	yes
chr1	26606452	8.898	0.292	no	yes
chr1	27022136	17.07	1.02	yes	yes
chr1	27216540	27.486	0.988	no	no
chr1	27248299	11.546	0.566	no	yes
chr1	27286947	11.872	0.876	no	yes
chr1	27321075	7.326	1.114	no	no
chr1	27648571	12.79	0	yes	yes
chr1	27675987	10.286	0.132	no	yes
chr1	28286642	12.958	1.678	no	no
chr1	28908348	14.278	0.4	yes	yes
chr1	28975106	33.196	0.814	no	yes
chr1	29063340	12.674	1.134	yes	yes
chr1	29507823	9.8	0.584	no	yes
chr1	29508558	14.188	0.292	yes	yes
chr1	31252543	10.508	1.526	no	no
chr1	31538645	10.212	1.11	yes	yes
chr1	31628503	7.48	0.292	no	yes
chr1	31886664	9.688	2.44	no	no
chr1	32228404	8.242	3.498	no	yes
chr1	32479335	11.604	0	yes	yes
chr1	32671257	18.332	1.366	yes	yes
chr1	32741113	7.79	1.99	no	no
chr1	32800914	8.958	0.292	no	yes
chr1	33283036	11.694	1.3	yes	yes
chr1	33283357	11.532	0.058	yes	yes
chr1	33438715	8.938	1.246	no	yes
chr1	34126050	12.94	0.61	no	no
chr1	35325440	14.366	0.588	no	yes
chr1	35331921	12.366	0.102	no	yes
chr1	35390564	11.194	3.094	no	yes
chr1	36107084	10.956	0.494	no	yes
chr1	36348554	10.226	0.65	no	yes
chr1	36396410	12.108	0	no	yes
chr1	36554399	16.458	1.562	no	yes
chr1	36615213	16.444	0.604	no	yes
chr1	36916271	10	0.192	no	no
chr1	37951375	14.168	0.626	no	no
chr1	37980307	8.79	0	no	yes
chr1	38261040	10.112	2.708	no	no
chr1	38274443	11.03	0.758	no	yes
chr1	38325814	13.596	0.596	no	yes
chr1	39325736	10.04	0	no	yes
chr1	39338915	16.566	0.534	no	yes
chr1	39456912	9.296	0.292	no	yes
chr1	39827038	8.712	0.584	no	no
chr1	40025237	11.16	0.584	no	no
chr1	40157222	11.136	0.812	no	yes
chr1	40781016	11.748	0	no	no
chr1	40974302	10.22	0.532	no	yes
chr1	41157364	12.04	0.584	yes	yes
chr1	41950301	14.412	0	no	yes
chr1	42801120	12.952	0.584	no	yes
chr1	43124104	14.25	1.15	no	yes
chr1	43232627	11.096	0.444	no	yes
chr1	43390001	13.606	0.518	no	yes
chr1	43424368	10.648	0	no	yes
chr1	43637902	11.84	1.134	no	yes
chr1	43855575	9.89	0.292	no	yes
chr1	43919703	12.746	0	no	yes
chr1	44002393	11.718	0	no	yes
chr1	44016035	11.53	0.05	no	yes
chr1	44172894	13.166	0.876	yes	yes
chr1	44412477	88.168	0	no	yes
chr1	44440640	12.292	0	yes	yes
chr1	44457651	13.32	1.044	no	yes
chr1	44679195	17.994	1.338	no	no
chr1	45187566	26.826	0.292	no	no
chr1	45196896	18.852	0	no	no
chr1	45241279	11.178	1.07	no	yes
chr1	45266455	8.584	0.308	no	no
chr1	45308885	7.404	2.144	no	no
chr1	45477764	20.918	0.004	no	no
chr1	45671826	6.974	0.378	no	no
chr1	45769766	16.584	0.468	yes	yes
chr1	45805889	15.136	0.738	yes	yes
chr1	45987517	12.536	0.93	yes	yes
chr1	46153966	10.834	0.394	no	yes
chr1	46598219	10.05	0.142	no	yes
chr1	46859932	8.492	0.876	no	yes
chr1	46955718	8.69	2.032	no	yes
chr1	47800095	11.446	0.394	yes	yes
chr1	47900296	11.024	0.932	no	no
chr1	47902949	11.352	1.456	yes	yes
chr1	47903268	10.278	0.06	yes	yes
chr1	47943851	11.414	0.304	no	yes
chr1	48463400	8.648	1.95	no	no
chr1	50798838	11.392	2.762	no	no
chr1	52499064	12.326	0.874	no	yes
chr1	53387333	14.76	0.876	no	yes
chr1	53704239	14.024	1.538	no	yes
chr1	54304116	103	0.584	no	yes
chr1	55181459	11.052	0.734	no	yes
chr1	55681169	9.452	0.116	no	yes
chr1	57044744	11.29	1.272	no	yes
chr1	57333281	8.84	0	no	no
chr1	57411877	8.13	1.478	no	no
chr1	59011961	9.226	0.162	no	yes
chr1	59249663	12.708	0.292	no	yes
chr1	60437375	8.604	2.264	no	yes
chr1	62902554	39.458	0.052	yes	yes
chr1	63989062	13.692	0.876	yes	yes
chr1	64058944	9.456	0.876	no	yes
chr1	64059257	8.58	0.306	no	yes
chr1	64239783	8.904	1.128	no	yes
chr1	65532415	9.896	1.774	no	yes
chr1	65886617	9.598	0.584	no	yes
chr1	68038553	11.36	1.656	no	no
chr1	68151048	9.358	0.404	no	yes
chr1	69010481	9.926	0.292	no	no
chr1	69450393	7.36	2.778	no	no
chr1	70671354	25.77	0.834	yes	yes
chr1	70687086	13.118	0.362	no	yes
chr1	71520224	9.242	3.132	no	no
chr1	71546842	38.61	0	no	yes
chr1	72748525	10.482	2.518	no	yes
chr1	75927736	8.454	3.498	no	no
chr1	76251825	38.536	0.052	no	yes
chr1	78148516	13.068	0.44	yes	yes
chr1	84464923	15.074	2.112	no	yes
chr1	84543451	9.474	0	yes	yes
chr1	84543948	9.1	0.922	yes	yes
chr1	84764380	10.498	0.432	no	yes
chr1	84945080	12.946	0.292	no	yes
chr1	85086670	10.176	0.26	no	yes
chr1	85463227	8.248	1.784	no	yes
chr1	85667333	10.252	0.584	yes	yes
chr1	85724827	7.888	0.654	no	no
chr1	85742496	12.602	0.4	no	yes
chr1	87170250	17.54	1.346	no	yes
chr1	87170649	12.944	0.294	no	yes
chr1	87379906	50.712	0	no	yes
chr1	87380491	12.752	0.67	no	yes
chr1	87797534	12.682	2.668	no	no
chr1	89149948	10.414	0.056	no	yes
chr1	89150490	14.432	0.384	no	yes
chr1	89458204	10.138	0.956	no	yes
chr1	90286406	19.144	0.436	no	yes
chr1	90460827	11.632	0	yes	yes
chr1	91966805	15.9	0.352	yes	yes
chr1	92351116	10.692	1.17	no	yes
chr1	92351560	13.084	2.522	no	yes
chr1	93250506	9.686	0	no	yes
chr1	93297618	13.856	0.924	no	yes
chr1	93544690	15.058	0.7	no	yes
chr1	93646143	11.298	0.344	yes	yes
chr1	93811496	17.434	0	yes	yes
chr1	93913701	10.228	1.212	no	no
chr1	93914131	9.57	0.866	no	no
chr1	94311976	11.048	0.292	yes	yes
chr1	94313135	23.098	0.206	no	yes
chr1	94884236	13.3	0.506	yes	yes
chr1	95209691	23.694	0.292	no	no
chr1	100315861	15.63	0.69	no	yes
chr1	100503650	17.208	0.292	yes	yes
chr1	100951561	20.378	0.166	no	no
chr1	107599388	11.392	0.172	no	yes
chr1	107600021	12.236	0.218	no	yes
chr1	107684369	8.888	0.584	no	no
chr1	109203921	12.114	1.682	yes	yes
chr1	109234981	11.588	1.236	no	yes
chr1	109289195	11.244	0.292	no	yes
chr1	109419917	14.314	1.188	yes	yes
chr1	109584680	13.33	0	no	yes
chr1	109642900	12.734	0.748	no	yes
chr1	109783491	11.424	1.358	no	yes
chr1	110026904	16.138	1.168	no	yes
chr1	110036758	13.96	0.26	no	yes
chr1	110052084	9.994	1.312	no	yes
chr1	110091368	14.174	0.812	no	yes
chr1	110175409	11.854	0	no	no
chr1	110211125	6.598	1.064	no	no
chr1	110778826	19.038	0.584	no	no
chr1	110950401	18.504	0.468	no	yes
chr1	113008811	14.884	1.438	no	yes
chr1	113162473	11.412	0.09	yes	yes
chr1	113217058	14.294	1.694	no	no
chr1	113217462	22.28	1.062	no	yes
chr1	113498295	11.646	0	no	no
chr1	113498800	10.496	1.15	yes	yes
chr1	113934053	12.176	0.292	no	yes
chr1	114354634	14.108	0.876	no	yes
chr1	114355066	12.116	0.138	no	yes
chr1	115053269	11.552	0.584	yes	yes
chr1	115053959	10.694	0.094	yes	yes
chr1	115259321	27.428	0.292	no	yes
chr1	116519307	9.486	0.584	yes	yes
chr1	116694903	11.84	0.448	no	no
chr1	117113233	12.738	0.428	yes	yes
chr1	144932510	21.542	2.074	yes	yes
chr1	145382813	27.104	0.064	no	yes
chr1	145576089	11.13	0	no	yes
chr1	145589376	15.114	1.696	no	no
chr1	145713866	11.29	2.4	no	no
chr1	146643991	17.238	0.394	no	yes
chr1	147735876	33.374	0	no	yes
chr1	147806852	27.798	0.24	no	yes
chr1	148241534	33.572	0.584	yes	yes
chr1	149224051	38.878	1.244	yes	yes
chr1	149871738	13.156	0.876	no	no
chr1	149899670	13.386	0.292	no	yes
chr1	149982636	16.022	0.77	yes	yes
chr1	150534080	11.358	0.48	no	yes
chr1	150552080	11.292	0.292	no	yes
chr1	151032069	11.31	0.202	no	yes
chr1	151162622	10.264	0.786	no	yes
chr1	151299933	47.664	0.84	no	yes
chr1	151335154	13.912	0.808	no	no
chr1	151736041	82.764	0	no	yes
chr1	153606843	14.388	0.876	no	yes
chr1	153748174	13.118	0.292	yes	yes
chr1	153748523	10.278	1.432	yes	yes
chr1	153756083	9.578	0	yes	yes
chr1	153919294	10.244	0.876	yes	yes
chr1	153931160	13.554	0.306	no	yes
chr1	153935781	10.47	0.05	yes	yes
chr1	153936677	12.652	1.282	yes	yes
chr1	154155906	12.624	0	yes	yes
chr1	154244959	16.894	0.292	no	yes
chr1	154297326	13.892	2.262	no	no
chr1	154531354	11.442	0.374	yes	yes
chr1	154600054	10.024	0.71	no	yes
chr1	154934305	25.626	0	yes	yes
chr1	154973740	19.532	0.746	no	yes
chr1	155023545	10.558	0.008	yes	yes
chr1	155098972	10.77	1.138	yes	yes
chr1	155108165	24.69	0.45	no	yes
chr1	155145751	13.364	0.614	no	yes
chr1	155214588	15.036	1.358	yes	yes
chr1	155225232	10.898	0.014	no	no
chr1	155232194	40.11	0.876	no	yes
chr1	155294013	14.164	0	yes	yes
chr1	155294478	13.536	0.194	yes	yes
chr1	155532891	13.536	0.276	no	no
chr1	155658663	13.92	1.544	no	yes
chr1	155881141	15.256	0.292	no	yes
chr1	156024584	13.562	0.846	no	yes
chr1	156182916	19.308	0.51	no	yes
chr1	156326787	12.534	2.812	no	no
chr1	156471001	11.476	1.114	no	yes
chr1	156474888	11.08	0.584	no	no
chr1	156561830	18.7	0.288	no	no
chr1	156586449	15.94	0.512	no	yes
chr1	156711154	16.666	1.11	no	yes
chr1	156721684	13.724	0.132	yes	yes
chr1	156860081	11.306	2.618	no	no
chr1	159870287	12.876	0	no	yes
chr1	159906455	14.258	1.024	no	no
chr1	160175564	18.4	0.164	no	yes
chr1	161008213	10.276	2.332	no	no
chr1	161008687	21.212	0.286	no	yes
chr1	161053507	20.174	0.948	no	no
chr1	161129195	15.04	0.418	no	no
chr1	161135908	19.01	0.044	no	yes
chr1	161147222	15.86	0	no	no
chr1	161410346	11.544	1.28	no	yes
chr1	161510028	7.488	2.462	yes	yes
chr1	161696558	15.778	3.306	no	yes
chr1	161719901	16.244	1.848	yes	yes
chr1	161736173	13.472	0.292	no	yes
chr1	162531636	11.522	1.404	no	yes
chr1	163291624	16.846	0.292	no	yes
chr1	165266339	8.704	1.73	no	no
chr1	166845490	12.834	0.632	yes	yes
chr1	167513954	17.818	0.49	no	no
chr1	167683863	14.428	0.786	yes	yes
chr1	168105775	11.186	2.532	no	no
chr1	169076058	12.288	3.394	yes	yes
chr1	169555735	14.024	1.796	no	no
chr1	170501140	50.038	0.582	no	yes
chr1	170567133	8.882	1.742	no	no
chr1	173446628	13.188	0.746	yes	yes
chr1	173831106	12.476	0.338	no	no
chr1	174969242	11.57	0.726	yes	yes
chr1	176176222	12.92	0.796	yes	yes
chr1	178063709	15.472	2.726	yes	yes
chr1	178511628	14.872	0.164	no	yes
chr1	178994826	10.398	0.224	yes	yes
chr1	179051264	21.702	1.166	yes	yes
chr1	179263082	11.288	0.782	yes	yes
chr1	179334981	41.832	0.41	no	yes
chr1	179555547	13.006	0	no	yes
chr1	179851841	12.922	0.466	yes	yes
chr1	180471975	12.07	0.258	yes	yes
chr1	180601665	11.338	0.584	no	no
chr1	180991617	10.892	1.23	no	yes
chr1	181057939	11.766	0	no	yes
chr1	181394373	12.394	3.266	no	no
chr1	181999453	9.486	1.168	no	yes
chr1	182360446	18.092	1.168	no	yes
chr1	182759080	11.926	1.728	no	yes
chr1	183441300	11.048	0	no	yes
chr1	184006391	12.182	2.502	no	no
chr1	184020789	12.328	1.67	yes	yes
chr1	184392225	17.332	0.292	no	no
chr1	184723398	11.308	0.306	no	yes
chr1	184874854	13.976	0	no	yes
chr1	184899265	16.66	0.278	no	no
chr1	185286314	10.118	0	yes	yes
chr1	185675129	7.628	0	no	no
chr1	192777727	12.472	2.228	no	yes
chr1	192813669	10.298	0.584	no	no
chr1	192967000	10.16	1.944	no	no
chr1	193028576	14.854	0.764	no	yes
chr1	193073838	12.96	0.292	yes	yes
chr1	193091071	53.75	0.542	yes	yes
chr1	196902844	12.344	1.222	no	yes
chr1	197744530	10.022	0	no	yes
chr1	197871899	10.76	0	no	yes
chr1	198806819	16.85	0	no	no
chr1	200447193	15.324	0.018	no	yes
chr1	200638817	10.842	0	yes	yes
chr1	201244495	12.014	1.318	no	no
chr1	201368667	15.942	0.584	no	yes
chr1	202317871	13.562	0.584	no	yes
chr1	202777494	9.412	0	no	no
chr1	202779917	8.38	0	no	no
chr1	202858185	13.464	0.292	no	yes
chr1	204042338	11.542	2.542	yes	yes
chr1	204043672	14.99	2.854	yes	yes
chr1	204058314	16.938	0.076	no	no
chr1	204346921	9.252	2.174	no	no
chr1	204380902	14.966	0.31	no	yes
chr1	205091376	66.44	0.292	no	yes
chr1	205180802	18.896	0.292	no	yes
chr1	205313444	11.342	1.85	no	yes
chr1	205601242	18.85	0	yes	yes
chr1	205744393	12.966	0.292	no	yes
chr1	205782111	10.756	0.584	no	no
chr1	206680927	11.472	0.188	no	no
chr1	206730644	12.362	0.77	no	yes
chr1	206785767	25.82	0	no	no
chr1	206808974	13.554	2.904	yes	yes
chr1	207082912	13.44	0.382	yes	yes
chr1	207192567	13.85	0.002	no	no
chr1	207490164	15.456	0.304	no	yes
chr1	207494990	12.984	3.5	yes	yes
chr1	208418116	13.168	0.74	no	no
chr1	208472174	11.842	0.292	no	no
chr1	209957923	20.4	0.248	yes	yes
chr1	210406097	7.962	3.306	no	yes
chr1	211432380	13.64	0.584	yes	yes
chr1	211433744	11.134	0	no	no
chr1	211751227	10.792	0.668	no	no
chr1	212732138	11.974	0.996	yes	yes
chr1	212782140	21.778	0.292	yes	yes
chr1	212838849	14.93	2.22	no	no
chr1	212965145	17.874	0.434	no	yes
chr1	213224482	17.87	0.924	no	yes
chr1	214723997	12.988	1.794	no	no
chr1	214724489	11.804	0	yes	yes
chr1	218458250	12.68	0.222	no	yes
chr1	219452926	11.48	0.292	no	no
chr1	220267899	11.114	0.178	no	yes
chr1	220701834	10.206	1.488	yes	yes
chr1	220863603	16.174	0.752	no	yes
chr1	221053133	9.26	1.504	no	no
chr1	221915970	11.604	0.292	yes	yes
chr1	222817590	12.598	1.034	no	yes
chr1	222858247	10.442	0	no	no
chr1	223254779	10.254	0.584	no	yes
chr1	224033952	12.31	0.81	yes	yes
chr1	224301826	14.686	0.58	no	yes
chr1	224465285	13.24	0	no	no
chr1	224518014	72.948	0.508	yes	yes
chr1	224544814	11.74	0.402	no	yes
chr1	225117522	15.224	0.302	yes	yes
chr1	225881985	12.458	0.352	no	no
chr1	226070282	10.122	0.292	no	yes
chr1	226111776	13.29	0.958	yes	yes
chr1	226271321	10.882	0.806	no	yes
chr1	226298573	9.236	1.474	yes	yes
chr1	227058607	9.986	1.486	no	yes
chr1	227916508	14.868	0.292	no	no
chr1	227917094	13.98	0.418	no	no
chr1	227918429	12.832	0.728	no	no
chr1	227923028	27.672	0	no	yes
chr1	227975715	15.036	0.362	yes	yes
chr1	227976225	9.648	1.992	no	no
chr1	228270062	11.022	0	no	yes
chr1	228401311	9.894	0	no	no
chr1	228521087	7.742	3.192	no	no
chr1	228870903	10.988	0.324	no	yes
chr1	228871395	9.55	1.444	no	yes
chr1	229644138	15.17	0	no	yes
chr1	230778065	19.86	2.254	no	yes
chr1	230999385	14.882	0.584	no	no
chr1	231558274	11.36	0.112	yes	yes
chr1	231664211	50.256	0.526	no	yes
chr1	232581288	8.774	1.752	no	no
chr1	232766519	9.666	1.11	no	yes
chr1	234735688	9.204	0	yes	yes
chr1	235292176	21.474	0.748	no	yes
chr1	235490339	9.304	0.544	no	no
chr1	235668496	12.18	0.218	no	yes
chr1	236029913	9.522	0.584	no	yes
chr1	236445251	12.27	1.214	no	no
chr1	236687148	11.342	0	no	yes
chr1	236958703	14.294	0.584	yes	yes
chr1	241682764	9.712	0.876	yes	yes
chr1	243417706	10.214	0.35	no	yes
chr1	244211198	16.532	2.996	no	yes
chr1	244615447	12.17	0	yes	yes
chr1	244883211	14.766	0.17	no	no
chr1	244998747	16.754	0.77	yes	yes
chr1	245027611	12.946	1.916	yes	yes
chr1	245133087	11.97	0.89	yes	yes
chr1	245134276	14.748	0.292	yes	yes
chr1	245564789	8.644	0.534	no	no
chr1	246670459	9.354	0	no	yes
chr1	246772279	16.474	0.094	no	yes
chr1	247241651	12.144	0.468	no	no
chr1	247267472	12.478	0.584	no	yes
chr1	247373746	9.034	0.742	no	no
chr1	249152289	16.23	0.292	no	yes
chr1	249153480	20.114	0.268	no	yes
chr1	249200581	13.532	0.046	no	yes
chr10	1095224	16.482	0	yes	yes
chr10	1095490	12.888	0.816	no	yes
chr10	1102752	10.496	1.46	no	yes
chr10	3827772	8.264	0.214	no	yes
chr10	4101042	10.754	0	no	no
chr10	4172246	11.832	1.264	no	no
chr10	5545554	19.54	0.514	no	yes
chr10	6187436	8.7	0.68	no	yes
chr10	6297597	19.716	0.978	no	no
chr10	7860464	12.388	0	no	yes
chr10	12085038	61.966	1.168	no	yes
chr10	12647823	15.172	1.136	no	no
chr10	12827727	10.832	0.618	no	no
chr10	13390427	11.826	0.584	yes	yes
chr10	13533968	9.4	0.584	no	no
chr10	13628998	9.038	0.438	no	yes
chr10	13760136	17.96	0.876	no	no
chr10	15001993	10.24	0	no	yes
chr10	17243658	10.014	0.292	no	yes
chr10	17686019	65.664	0.15	no	yes
chr10	21806485	9.93	2.13	yes	yes
chr10	22610497	10.602	1.168	no	yes
chr10	22725935	11.998	1.332	no	yes
chr10	23729447	8.884	1.32	no	no
chr10	27530991	12.046	0.236	no	yes
chr10	30024947	14.544	1.042	no	yes
chr10	31321081	8.82	0.292	no	yes
chr10	31892183	9.088	0.762	no	yes
chr10	32345152	9.446	0.202	no	yes
chr10	33624168	10.82	0	no	yes
chr10	35416005	8.494	0.292	no	yes
chr10	42739006	13.294	2.902	no	no
chr10	43278113	19.6	0.876	no	yes
chr10	43892841	10.684	0	no	yes
chr10	43904472	11.992	0.876	yes	yes
chr10	44185761	21.206	2.432	no	yes
chr10	44806678	12.312	2.438	no	yes
chr10	44882188	9.966	3.472	no	no
chr10	45360478	14.122	0.08	no	yes
chr10	47656019	7.768	1.706	yes	yes
chr10	48354652	10.344	1.46	no	yes
chr10	49864506	12.888	3.074	no	yes
chr10	52384878	10.154	0.544	yes	yes
chr10	58143750	9.572	0.25	no	no
chr10	59519717	11.466	0.244	no	no
chr10	61666454	11.424	0	yes	yes
chr10	62538693	9.892	0.506	yes	yes
chr10	62643051	10.05	1.868	no	no
chr10	64576481	32.758	0.876	no	yes
chr10	65225107	11.956	1.02	yes	yes
chr10	65472214	17.62	0.066	no	yes
chr10	68620465	11.514	0.292	no	no
chr10	69644255	9.306	0.316	yes	yes
chr10	70166900	9.774	0.292	no	yes
chr10	70287144	10.108	0.392	no	yes
chr10	70939984	50.268	0.584	no	yes
chr10	71078757	10.346	0.178	no	yes
chr10	71120599	10.562	0.612	no	no
chr10	71560022	8.528	2.83	no	no
chr10	71905717	12.848	0.292	no	yes
chr10	71906234	14.144	0.292	no	yes
chr10	71992988	8.744	0.694	no	yes
chr10	72142171	8.828	0.292	yes	yes
chr10	72163939	7.65	0	no	yes
chr10	72273709	7.562	1.292	no	no
chr10	72647827	8.78	0.584	no	no
chr10	72972188	8.16	1.014	no	yes
chr10	74008794	11.59	0.292	no	no
chr10	74033978	15.428	1.136	no	no
chr10	74091813	11.814	0.714	no	yes
chr10	74114537	13.346	0	no	yes
chr10	74856469	11.532	0.794	no	yes
chr10	75007089	20.87	1.168	yes	yes
chr10	75012297	19.832	0.4	no	yes
chr10	75532323	31.77	0.292	yes	yes
chr10	75571166	10.176	0.584	no	no
chr10	75579462	15.632	0	no	yes
chr10	75758011	8.77	0.87	no	yes
chr10	75910714	30.53	0.714	no	yes
chr10	76970435	80.868	0	no	yes
chr10	76995859	14.688	0.448	no	yes
chr10	77161422	7.762	0	yes	yes
chr10	77162048	12.622	0	no	no
chr10	77163204	14.534	0.542	no	yes
chr10	77168994	10.314	0	no	yes
chr10	79258189	15.808	0.238	no	no
chr10	79267277	12.974	0	no	no
chr10	79305449	9.578	1.256	no	no
chr10	79793494	17.114	0	no	yes
chr10	79844431	10.538	3.358	no	no
chr10	80062832	13.662	0	no	yes
chr10	80831066	11.356	0.514	no	yes
chr10	81741684	11.982	1.382	no	yes
chr10	81904045	10.114	0.876	no	no
chr10	83030041	12.642	0	no	no
chr10	85899275	9.462	0.002	no	yes
chr10	92980626	7.864	0.13	no	yes
chr10	94051008	11.772	0.192	yes	yes
chr10	94333818	10.27	0.122	no	yes
chr10	95462472	8.838	0.876	no	yes
chr10	96943534	13.622	0.892	no	yes
chr10	97320372	8.966	1.57	no	yes
chr10	97667514	10.508	0.452	yes	yes
chr10	97849915	15.692	0.456	no	yes
chr10	98141698	9.194	0	no	no
chr10	98273632	30.918	0.292	no	yes
chr10	99078889	10.064	0.15	no	yes
chr10	99206093	12.748	0.292	no	yes
chr10	99400473	9.694	0.988	no	yes
chr10	99473959	15.348	0.58	yes	yes
chr10	99649267	8.068	3.086	no	no
chr10	100174864	15.072	0.598	no	yes
chr10	100227427	12.624	2.31	no	no
chr10	101089168	9.932	0.692	no	yes
chr10	102321974	14.978	2.354	no	no
chr10	103124670	15.2	0.292	no	yes
chr10	103454554	9.55	1.816	no	no
chr10	103590493	13.074	1.84	no	yes
chr10	103825207	8.804	0	no	yes
chr10	103912156	13.652	0.124	yes	yes
chr10	103989721	12.896	1.456	no	yes
chr10	104153891	11.282	1.174	no	yes
chr10	104159458	13.79	0.292	no	yes
chr10	104181018	16.862	0.294	no	yes
chr10	104181907	11.798	0.292	no	yes
chr10	104182471	10.636	0.292	no	no
chr10	104210775	7.806	0.872	no	yes
chr10	104404615	12.084	1.042	no	yes
chr10	104953247	10.576	1.168	no	yes
chr10	105127767	13.306	0.578	no	yes
chr10	105992063	15.184	0.768	no	yes
chr10	106028630	11.62	0.724	no	yes
chr10	106097916	10.744	0	no	yes
chr10	111768052	8.546	0.46	no	no
chr10	111986915	7.522	0	no	no
chr10	112257564	13.35	0	no	yes
chr10	112432008	10.034	0.796	no	yes
chr10	112591124	8.794	1.252	no	no
chr10	115439516	13.712	0.208	yes	yes
chr10	115614387	6.878	0	no	yes
chr10	118764606	10.672	0.544	yes	yes
chr10	119135192	8.428	0.358	no	yes
chr10	121201359	7.628	3.13	no	no
chr10	122012968	11.324	0.55	no	no
chr10	122610769	14.18	0.584	no	yes
chr10	122738923	10.674	1.33	no	yes
chr10	123733920	9.164	0.292	no	yes
chr10	123734680	10.29	0.606	yes	yes
chr10	123880729	8.284	0.252	no	no
chr10	124638855	11.02	0.876	no	yes
chr10	124740050	12.186	0.584	no	no
chr10	124768429	9.13	0.556	no	no
chr10	126078050	8.31	2.238	no	no
chr10	131909810	7.208	0.57	no	yes
chr10	131988813	12.37	0.266	no	yes
chr10	134145657	9.95	0	no	yes
chr10	134779105	12.13	0.292	no	yes
chr10	134882878	8.308	3.362	no	no
chr11	207801	10.904	0.05	no	yes
chr11	208823	10.332	0.594	yes	yes
chr11	406963	9.04	0.628	no	no
chr11	417257	8.318	0.81	no	yes
chr11	430160	6.912	1.408	no	no
chr11	448463	8.738	0.292	no	yes
chr11	450292	17.438	0.584	no	no
chr11	506465	11.608	1.292	no	no
chr11	534655	9.578	1.434	no	yes
chr11	537304	10.02	0.122	no	yes
chr11	554845	8.014	0.972	no	no
chr11	575676	7.83	0.738	no	no
chr11	615835	14.242	0.054	no	yes
chr11	705341	12.232	0	no	no
chr11	705921	9.21	0.584	no	no
chr11	706627	8.428	0.292	no	no
chr11	728179	7.932	1.448	no	no
chr11	805419	9.822	0.352	yes	yes
chr11	809790	13.332	1.256	yes	yes
chr11	827494	7.78	1.984	no	yes
chr11	832517	10.1	0.304	no	no
chr11	842740	13.974	0	no	no
chr11	910670	7.886	0.846	no	no
chr11	1595740	7.396	1.354	no	no
chr11	2223840	15.504	0.606	no	no
chr11	2278430	18.462	0.458	no	yes
chr11	2330179	7.004	0.632	no	no
chr11	2421637	20.068	0.068	no	no
chr11	2800088	9.522	1.3	no	no
chr11	2828679	8.094	1.242	no	no
chr11	2952128	10.968	1.808	no	no
chr11	3186764	8.586	0.692	no	no
chr11	4116081	12.634	0	yes	yes
chr11	4208954	11.286	0.584	yes	yes
chr11	7560160	15.502	0.118	no	yes
chr11	8615723	17.228	0	no	no
chr11	8710447	21.616	0	no	yes
chr11	8986076	14.776	0	no	yes
chr11	10772653	10.238	0.292	no	yes
chr11	10953141	9.11	0.512	no	yes
chr11	11863735	11.778	0.518	no	no
chr11	12270198	12.324	0.582	no	yes
chr11	13299095	21.802	1.086	no	yes
chr11	13690179	9.928	0.036	no	yes
chr11	14379966	10.546	1.46	no	yes
chr11	14380856	9.404	0.776	no	no
chr11	14402775	13.1	0.018	no	yes
chr11	14542016	10.828	0	yes	yes
chr11	14665958	10.946	0	no	yes
chr11	15671763	16.28	0	no	no
chr11	15690448	10.748	0.876	no	no
chr11	17373349	7.636	0.812	no	yes
chr11	18127767	9.634	0.962	no	yes
chr11	18416164	13.466	0.292	yes	yes
chr11	18548451	11.294	0.292	no	yes
chr11	18610176	10.242	0.292	no	yes
chr11	18656202	8.97	0.824	no	yes
chr11	19734216	9.21	0.234	yes	yes
chr11	20408901	12.71	0.312	yes	yes
chr11	20409764	10.178	0.102	no	yes
chr11	20931198	6.988	2.748	no	no
chr11	22646815	13.658	0	no	yes
chr11	27384703	15.228	0.54	no	yes
chr11	30344568	16.374	0.584	no	yes
chr11	32851811	10.042	0	yes	yes
chr11	33061383	9.876	0.584	yes	yes
chr11	33279036	8.396	0	yes	yes
chr11	33866103	7.768	3.448	no	no
chr11	34073099	71.312	0.306	yes	yes
chr11	34073940	8.044	0	yes	yes
chr11	34127039	43.952	0.824	no	no
chr11	34653746	14.302	0	no	yes
chr11	34937823	28.58	1.06	no	yes
chr11	36311071	14.162	2.036	no	no
chr11	36531380	10.724	0.868	no	yes
chr11	36531952	13.306	0.59	no	yes
chr11	43333660	11.268	0.844	no	yes
chr11	43665786	12.382	1.288	no	no
chr11	43902248	17.86	2.35	no	no
chr11	44932988	9.236	1.398	no	no
chr11	44958196	9.82	0.794	no	no
chr11	45361783	12.366	1.504	no	yes
chr11	45793468	12.294	1.402	no	no
chr11	45827029	9.81	0.822	no	no
chr11	45921504	7.418	0.584	no	no
chr11	45944077	9.116	0.086	no	yes
chr11	46867824	11.874	0.292	no	yes
chr11	47198550	22.666	0.584	no	yes
chr11	47207369	13.098	0.584	yes	yes
chr11	47457488	7.284	0.672	no	no
chr11	47574325	11.678	0.876	yes	yes
chr11	47600515	28.878	0.872	no	yes
chr11	47663831	13.926	1.752	yes	yes
chr11	48063597	15.156	0	no	no
chr11	57078842	15.128	0	no	yes
chr11	57117481	10.358	1.664	no	no
chr11	57508892	39.498	1.38	no	yes
chr11	58939349	10.96	0.292	no	yes
chr11	59577930	14.02	0.138	no	yes
chr11	60691837	12.428	0.45	no	yes
chr11	60692496	10.652	2.102	no	no
chr11	61197250	8.52	0.532	no	yes
chr11	61276806	8.078	0.292	no	yes
chr11	61335142	12.946	2.052	no	no
chr11	61349053	12.238	0.024	no	no
chr11	61356050	9.484	0.584	no	no
chr11	61582626	10.704	1.076	no	no
chr11	61595190	11.166	0.876	no	no
chr11	61595762	11.52	1.154	no	no
chr11	61637237	10.214	1.222	no	no
chr11	62078758	9.988	2.808	no	no
chr11	62341750	16.88	0.278	no	yes
chr11	62369020	16.242	0.376	no	yes
chr11	62380714	8.384	0.568	no	no
chr11	62414029	13.766	0.472	yes	yes
chr11	62432808	25.04	0.746	no	no
chr11	62473616	11.374	0.876	no	yes
chr11	62554178	10.124	0.292	no	yes
chr11	62554906	28.022	0.83	yes	yes
chr11	62559301	26.084	0.27	no	yes
chr11	62572913	9.96	0.022	no	yes
chr11	62600113	15.468	2.086	no	no
chr11	62606830	19.97	1.642	no	yes
chr11	62609207	57.042	0.562	yes	yes
chr11	62648707	15.868	1.256	no	yes
chr11	63581326	7.41	0.636	yes	yes
chr11	63754448	9.212	0.636	no	no
chr11	63993689	9.63	0.584	no	yes
chr11	63997787	11.452	0.788	yes	yes
chr11	63998169	10.874	0	no	no
chr11	64013456	10.774	0.704	no	yes
chr11	64037365	24.916	0.292	no	yes
chr11	64084638	14.986	1.074	no	yes
chr11	64109665	9.63	0.292	no	no
chr11	64490965	8.902	1.578	no	no
chr11	64863583	8.43	0.292	no	no
chr11	64880077	14.512	0	no	no
chr11	64884616	29.86	0.992	no	no
chr11	65082441	7.706	1.272	no	yes
chr11	65121859	12.006	0.584	no	yes
chr11	65184030	13.68	0.292	no	no
chr11	65189727	12.96	0	yes	yes
chr11	65190307	16.326	0.05	yes	yes
chr11	65194792	18.86	0.534	yes	no
chr11	65265030	19.36	0	yes	yes
chr11	65274361	18.542	0.876	no	no
chr11	65275337	18.912	0	no	no
chr11	65307409	11.832	0.716	no	yes
chr11	65307956	12.224	0.004	no	yes
chr11	65341926	10.352	0	no	yes
chr11	65342241	12.448	0.584	no	no
chr11	65343185	10.142	1.6	no	yes
chr11	65405694	9.852	0.292	yes	no
chr11	65414668	9.286	0.292	no	no
chr11	65420345	16.108	0	no	no
chr11	65421034	10.926	1.168	no	no
chr11	65487780	9.416	0.584	no	yes
chr11	65488243	14.28	0.292	yes	yes
chr11	65549173	9.024	0.868	no	yes
chr11	65625817	11.894	0	yes	yes
chr11	65668021	10.422	1.502	no	yes
chr11	65686798	12.772	0	no	no
chr11	65837330	9.156	1.36	no	yes
chr11	65956954	13.878	0	no	no
chr11	66025328	10.266	1.14	no	yes
chr11	66036316	8.06	0	no	no
chr11	66045229	9.948	0.858	no	no
chr11	66050097	15.876	0.934	no	no
chr11	66115573	10.562	0	yes	yes
chr11	66206431	70.044	0.806	no	yes
chr11	66247632	18.492	0.876	no	yes
chr11	66384267	11.142	0.876	yes	yes
chr11	66406214	12.068	0.082	no	yes
chr11	66445272	18.392	0	no	yes
chr11	66611033	20.466	0.798	no	yes
chr11	67055849	14.458	0.48	no	yes
chr11	67071042	14.616	0	no	yes
chr11	67080293	11.71	0.292	no	yes
chr11	67085150	11.932	0	no	yes
chr11	67159287	8.994	0.3	no	yes
chr11	67237025	8.424	0.292	no	yes
chr11	67398095	13.394	0.288	no	no
chr11	67442219	15.44	0.584	no	no
chr11	67805822	11.708	0.856	no	no
chr11	68608280	7.9	1.168	no	no
chr11	68671349	13.652	0.584	no	no
chr11	68867081	8.432	2.544	no	no
chr11	68874063	10.382	0.308	no	no
chr11	69456129	8.86	3.386	no	yes
chr11	69458300	8.616	0.758	no	yes
chr11	69469998	17.816	0.722	no	yes
chr11	69490051	10.424	0.396	no	yes
chr11	69706303	10.636	2.566	no	yes
chr11	69894957	10.96	3.172	no	no
chr11	70601833	12.964	2.944	no	no
chr11	70824309	25.818	0	no	no
chr11	70995201	12.298	0	no	no
chr11	71950666	16.754	0.5	no	no
chr11	72463732	10.718	0.452	no	no
chr11	72525289	11.454	0	yes	yes
chr11	72853498	9.048	1.168	yes	yes
chr11	73019147	7.71	1.206	no	yes
chr11	74109843	8.6	1.872	no	yes
chr11	74660152	11.16	0.212	no	yes
chr11	74699915	12.198	0	no	no
chr11	75480002	9.802	2.746	no	no
chr11	77531880	10.42	0.182	no	yes
chr11	77790969	15.06	0	no	yes
chr11	80493841	20.386	0.482	no	no
chr11	82393686	9.63	1.226	no	no
chr11	82997128	15.138	0.996	no	yes
chr11	85375937	9.184	0.584	yes	yes
chr11	86666241	8.096	1.308	no	no
chr11	86748727	12.15	0.496	no	yes
chr11	93275835	10.53	0	no	no
chr11	94245720	10.576	2.174	no	no
chr11	94277533	10.688	0	no	yes
chr11	94706825	10.012	0.876	no	yes
chr11	100558137	9.53	1.14	no	yes
chr11	101446674	7.998	2.534	no	no
chr11	101980870	10.54	1.164	yes	yes
chr11	107032543	12.726	0	no	no
chr11	107729232	11.366	0.682	no	yes
chr11	107879676	15.09	0.394	no	yes
chr11	107992362	10.482	0.21	no	yes
chr11	109963438	12.322	0.876	yes	yes
chr11	111205606	12.42	0	no	yes
chr11	111472812	12.932	0.292	no	yes
chr11	111473634	7.844	0.876	no	no
chr11	111957503	10.396	1.27	no	yes
chr11	114030916	17.578	0.252	no	no
chr11	114033692	28.902	0	no	no
chr11	114050169	63.404	0.734	no	no
chr11	115373955	8.776	0.458	no	yes
chr11	116375920	11.204	0.934	no	no
chr11	116643632	14.986	0.072	no	yes
chr11	116942308	15.758	0	no	no
chr11	117800106	11.884	0	no	yes
chr11	118023427	10.094	2.768	no	no
chr11	118042394	11.266	2.464	no	no
chr11	118272195	46.732	0.276	no	yes
chr11	118307048	8.828	0.292	yes	yes
chr11	118401667	10.406	0.292	no	yes
chr11	118964843	9.774	0	no	no
chr11	118966134	11.582	1.082	yes	yes
chr11	118977905	10.016	0.408	no	yes
chr11	119599982	9.492	1.31	no	yes
chr11	119612095	9.416	3.468	no	no
chr11	120172793	13.222	0	no	yes
chr11	120206888	10.172	0.292	no	yes
chr11	120912039	9.67	0.292	no	no
chr11	121323399	10.088	1.518	no	yes
chr11	123612306	10.954	1.452	no	yes
chr11	124271812	6.59	0.804	no	no
chr11	124670547	12.322	2.64	no	no
chr11	125495686	23.424	0.46	no	yes
chr11	125933067	8.894	0.292	no	yes
chr11	126138654	12.778	0.108	no	yes
chr11	126173971	16.356	0	no	yes
chr11	128392152	11.422	3.002	yes	no
chr11	128729778	9.248	2.676	no	yes
chr11	128884090	8.436	0.376	no	no
chr11	129873100	20.466	0.694	yes	yes
chr11	129895435	11.98	0	no	no
chr11	130786230	11.252	0.156	no	yes
chr11	131285851	9.41	0	no	no
chr11	131564854	14.286	0.752	no	no
chr11	133253684	12.024	0.292	no	no
chr11	133920637	10.538	2.45	no	no
chr11	134123410	10.78	0	no	yes
chr12	417848	7.188	0.292	no	no
chr12	862714	10.028	0	no	no
chr12	1099749	10.294	0.48	yes	yes
chr12	1702899	13.354	0.132	no	yes
chr12	1800560	8.696	0	no	yes
chr12	1940326	20.434	0.784	no	no
chr12	2113699	12.176	0.512	no	yes
chr12	2144113	9.944	0	no	no
chr12	2903857	9.166	0.734	no	yes
chr12	2986643	8.436	0.584	no	yes
chr12	2999793	10.09	0	no	yes
chr12	3000179	10.246	0.198	no	yes
chr12	6493213	15.026	0.584	no	no
chr12	6579808	10.158	0.976	no	yes
chr12	6647883	12.652	0.584	no	no
chr12	6677501	14.658	0.336	no	no
chr12	6862245	10.652	0.284	no	no
chr12	6961623	13.696	0.606	no	yes
chr12	6980723	9.892	1.236	no	no
chr12	6981601	12.616	0	no	no
chr12	7047189	56.022	0.288	yes	yes
chr12	7051895	11.184	0.292	no	no
chr12	7052954	18.752	0	no	no
chr12	7055900	18.304	0.574	no	yes
chr12	7079921	11.93	0	no	yes
chr12	7793931	7.324	2.832	no	no
chr12	8147754	7.386	0.744	no	yes
chr12	9800513	8.55	0.876	yes	yes
chr12	10365592	7.202	0	yes	yes
chr12	12420086	13.818	0.134	no	yes
chr12	12503182	9.854	0.89	no	yes
chr12	12876810	10.1	0.056	yes	yes
chr12	14927612	9.2	1.368	no	yes
chr12	14930291	11.102	0.292	no	no
chr12	15374374	18.924	1.33	no	no
chr12	15941908	8.494	0.292	no	yes
chr12	16035528	9.952	1.052	no	no
chr12	19592849	13.606	1.168	no	yes
chr12	20070127	10.96	0	no	no
chr12	21504112	8.664	0	no	no
chr12	22697407	14.53	0.584	yes	yes
chr12	23148764	7.406	3.308	no	no
chr12	27863870	14.566	0.292	no	yes
chr12	28343577	10.406	0.292	no	yes
chr12	29736849	8.308	1.474	no	no
chr12	30848928	9.888	0.344	no	yes
chr12	31478091	10.136	1.176	no	yes
chr12	31613186	12.132	0	no	no
chr12	32259900	7.846	1.01	yes	yes
chr12	32552665	9.382	0.292	yes	yes
chr12	39836529	8.758	0.292	yes	yes
chr12	41671068	10.242	1.868	no	no
chr12	46121413	9.276	0.584	no	yes
chr12	46122719	12.492	0.718	no	yes
chr12	46662747	13.798	0.29	yes	yes
chr12	46765209	14.324	0.064	no	yes
chr12	46887853	9.352	0	no	no
chr12	48500013	10.562	0.292	no	yes
chr12	48551265	12.168	0	no	no
chr12	49075778	13.386	0.75	yes	yes
chr12	49246046	14.426	0	yes	yes
chr12	49351038	9.004	0.724	no	no
chr12	49412613	18.902	1.074	no	yes
chr12	49524196	14.644	0.584	yes	yes
chr12	49741483	10.644	1.926	no	yes
chr12	51419865	9.238	0.074	no	yes
chr12	51632772	12.09	0	no	yes
chr12	51664043	10.14	0.294	no	no
chr12	52345054	9.286	0.46	no	yes
chr12	52463553	11.948	0.292	no	yes
chr12	52546061	12.756	3.488	no	no
chr12	52557956	10.01	1.666	no	no
chr12	52611226	12.514	0.178	no	yes
chr12	53591650	14.522	0	no	no
chr12	53607349	8.036	0.394	no	no
chr12	53693639	26.63	0.144	no	yes
chr12	53895097	13.39	0	no	yes
chr12	54333028	9.024	0.398	no	yes
chr12	54427356	13.256	0	no	no
chr12	54764263	11.154	0.476	no	yes
chr12	56223670	10.244	0.154	no	yes
chr12	56391165	15.392	0	no	no
chr12	56474077	9.924	0.584	no	yes
chr12	56498245	26.756	0.47	yes	yes
chr12	56511893	29.494	0	yes	yes
chr12	56551638	9.842	0.584	no	yes
chr12	56552361	12.538	0.564	no	no
chr12	56694243	23.42	0.25	yes	yes
chr12	56709832	47.894	0	no	yes
chr12	56881571	14.064	1.382	no	no
chr12	57024191	13.208	0.292	no	no
chr12	57030877	10.776	0.078	no	no
chr12	57483014	9.562	0	yes	no
chr12	58176576	17.492	0.584	no	yes
chr12	61098520	8.866	0	no	no
chr12	61104222	13.51	0.292	no	no
chr12	62609474	10.364	0	no	no
chr12	62653997	12.724	1.072	no	yes
chr12	62860644	11.22	0.264	no	yes
chr12	62996522	14.124	0.862	yes	yes
chr12	64173777	38.288	0	no	yes
chr12	64845741	13.152	0.584	yes	yes
chr12	64984177	15.512	0	no	no
chr12	66563700	15.954	1.168	yes	yes
chr12	69139811	15.238	0.876	no	yes
chr12	69202022	10.568	0.654	yes	yes
chr12	69349980	9.654	2.094	no	no
chr12	69684930	9.224	2.046	no	no
chr12	70947503	12.88	1.334	no	no
chr12	72148716	10.54	0.876	no	yes
chr12	72865702	7.406	2.086	no	no
chr12	73447857	19.6	0	no	no
chr12	76425620	15.49	1.25	yes	yes
chr12	76478398	8.368	0.292	yes	yes
chr12	77459234	8.8	0.384	yes	yes
chr12	80084547	8.64	0.584	yes	yes
chr12	81330691	14.278	3.206	no	yes
chr12	82752244	13.534	0.584	no	yes
chr12	83325227	11.37	0	no	no
chr12	88389605	8.724	1.526	no	no
chr12	88973635	13.52	2.662	yes	yes
chr12	89745393	13.312	3.018	no	no
chr12	89747554	13.928	0.584	no	yes
chr12	89918693	10.87	0.326	no	yes
chr12	89919860	11.116	0.292	no	yes
chr12	90103836	10.586	1.974	yes	yes
chr12	92539039	12.556	0.876	no	no
chr12	92539510	10.258	0.362	no	yes
chr12	92540158	9.794	0.584	no	yes
chr12	94071510	12.926	0.292	no	yes
chr12	94853615	10.878	1.168	no	yes
chr12	98909065	10.434	0.876	yes	yes
chr12	99039068	11.66	1.168	yes	yes
chr12	100536092	9.848	0.584	yes	yes
chr12	100661230	7.31	0	no	no
chr12	101368729	12.99	0	no	no
chr12	102271219	8.77	0.974	yes	yes
chr12	104350966	11.206	1.17	no	yes
chr12	104458077	11.006	0.07	no	yes
chr12	104531990	14.686	0	yes	yes
chr12	105725103	9.718	2.42	no	no
chr12	106696387	11.99	0.276	no	no
chr12	106751715	14.514	0	no	yes
chr12	107487063	9.632	0.584	no	yes
chr12	108955038	34.608	0.584	no	yes
chr12	109490379	11.452	0.584	no	no
chr12	110283206	8.49	1.212	no	yes
chr12	110338124	16.7	0.292	yes	yes
chr12	110437083	18.942	0	no	yes
chr12	110841602	35.774	0.292	no	yes
chr12	110907084	10.3	0.292	no	no
chr12	110940029	9.646	0	yes	yes
chr12	111375134	9.36	3.336	no	yes
chr12	111505555	14.02	0.812	no	no
chr12	111736982	10.838	3.278	no	no
chr12	111806888	9.346	0.996	no	no
chr12	112279832	90.612	1.448	no	yes
chr12	112856556	7.812	0.292	no	yes
chr12	113623154	10.734	0	no	yes
chr12	115106094	9.74	0.292	no	yes
chr12	115109469	9.874	1.932	no	no
chr12	115109975	10.584	0.14	no	no
chr12	116714627	8.73	0	no	yes
chr12	117074889	14.132	0.242	no	no
chr12	118541696	9.306	0.584	yes	yes
chr12	118814208	73.282	0.288	no	yes
chr12	120105886	11.058	1.752	no	yes
chr12	120524875	16.334	0.584	no	yes
chr12	120554868	8.448	0	no	yes
chr12	120632594	10.552	0.682	yes	yes
chr12	120639078	10.462	0.876	no	yes
chr12	120729783	21.696	0.18	no	yes
chr12	120731058	19.13	0.082	no	yes
chr12	120884527	10.304	1.966	no	yes
chr12	120933871	9.57	0.292	no	no
chr12	121124992	10.214	0.292	yes	yes
chr12	121647980	9.692	0.524	no	yes
chr12	121790024	8.986	0.584	yes	yes
chr12	122232219	17.326	0.062	no	no
chr12	122238190	8.678	0	no	yes
chr12	122710590	9.906	1.2	yes	yes
chr12	123459711	12.718	0.218	no	yes
chr12	123465018	18.686	1.07	no	yes
chr12	124086591	14.182	0.266	yes	yes
chr12	124196630	7.8	0.236	no	yes
chr12	124529810	6.604	3.038	no	no
chr12	124844408	17.854	0.374	no	yes
chr12	125399317	18.59	0.528	yes	yes
chr12	126168559	9.866	1.378	no	no
chr12	129307915	7.854	1.802	yes	yes
chr12	130516325	7.66	2.478	no	no
chr12	131303167	11.142	0.448	no	yes
chr12	132195377	10.478	0.292	no	yes
chr12	132380800	9.212	0	no	yes
chr12	132629073	10.74	0	no	yes
chr12	132638617	9.362	1.548	no	no
chr12	132991655	10.27	1.408	no	no
chr12	133137396	9.466	0.914	no	yes
chr12	133197677	8.122	2.14	no	no
chr12	133264033	9.522	0	no	yes
chr12	133287101	8.8	0.954	no	yes
chr12	133338877	8.182	0.216	no	yes
chr12	133405579	12.372	0	no	yes
chr12	133614377	9.986	0.438	no	yes
chr12	133706968	10.542	0	no	yes
chr12	133758165	12.072	1.35	no	yes
chr13	20176661	11.25	3.104	yes	yes
chr13	20437853	9.812	0.584	no	yes
chr13	22033314	8.972	0.292	no	yes
chr13	22178171	9.85	0	no	yes
chr13	24463568	8.456	0.016	no	yes
chr13	25861528	7.468	0.292	no	yes
chr13	26796575	13.806	0.026	no	yes
chr13	26828403	7.932	0.876	no	yes
chr13	27825560	56.598	0	no	yes
chr13	28404303	6.85	1.906	no	yes
chr13	28528202	6.748	1.474	no	no
chr13	30168993	9.284	0.554	yes	yes
chr13	30881761	11.992	1.222	no	yes
chr13	31248700	8.698	1.124	no	yes
chr13	38923849	23.42	0	no	yes
chr13	39612328	28.658	0	no	yes
chr13	40230022	7.926	0	no	no
chr13	41634443	9.448	0	yes	yes
chr13	41635622	11.564	0.492	no	yes
chr13	41837725	6.976	0.176	no	yes
chr13	41885591	7.696	0.292	no	yes
chr13	42535236	10.518	0.292	no	no
chr13	43498583	13.556	0.364	no	no
chr13	44453399	8.164	0.066	no	yes
chr13	44793238	11.746	1.164	no	no
chr13	45334390	9.282	0.714	no	no
chr13	47128342	12.436	0.648	no	yes
chr13	47371199	10.19	0.004	no	yes
chr13	48612293	12.04	0	no	yes
chr13	48669305	8.866	0.292	no	yes
chr13	50510411	12.928	0	no	no
chr13	50571540	10.308	0.584	yes	yes
chr13	50699069	8.586	0.498	yes	yes
chr13	52248636	10.35	0	no	no
chr13	52586203	9.018	0	no	yes
chr13	52703072	7.546	1.448	no	no
chr13	53024298	10.546	2.698	yes	yes
chr13	53424878	10.616	2.918	no	yes
chr13	53425476	9.806	1.77	no	yes
chr13	53775456	11.928	2.784	no	yes
chr13	76055084	7.12	0.858	yes	yes
chr13	77566438	11.212	0	yes	yes
chr13	77900576	7.95	0.584	no	no
chr13	78947033	6.958	0.274	no	no
chr13	79233211	9.192	0.658	yes	yes
chr13	89600962	10.046	0.336	no	no
chr13	91999572	8.376	0.76	yes	yes
chr13	95254181	10.258	0	yes	yes
chr13	99739564	9.416	0	yes	yes
chr13	100635279	7.914	1.664	no	yes
chr13	100741121	8	0.584	no	yes
chr13	103249092	10.35	1.272	no	yes
chr13	103451256	8.36	1.376	no	yes
chr13	103498269	11.846	0.292	no	yes
chr13	107188698	10.946	0.584	no	yes
chr13	107220036	7.738	0.872	no	yes
chr13	107389578	16.55	0	no	yes
chr13	110162069	9.794	0.06	no	no
chr13	111267927	7.884	0	no	yes
chr13	111567660	9.602	0.292	yes	no
chr13	111805926	8.15	0.584	no	yes
chr13	111997308	9.004	1.248	no	no
chr13	113242519	11.16	0.292	yes	yes
chr13	114103599	9.608	0.158	no	yes
chr13	114508569	7.06	3.092	no	no
chr14	20923103	39.216	0.312	no	yes
chr14	21439771	13.186	1.948	no	yes
chr14	21458120	11.044	0	no	yes
chr14	21493055	7.65	0.972	no	no
chr14	21560827	10.036	0.292	no	no
chr14	21572079	13.818	0	yes	yes
chr14	21924451	15.846	0	no	yes
chr14	23355964	10.518	0.99	no	yes
chr14	23451987	13.814	0.524	no	yes
chr14	23527190	14.792	0.664	yes	yes
chr14	23790201	13.938	1.22	no	yes
chr14	23790520	11.352	0.152	no	yes
chr14	23821923	10.876	2.076	no	yes
chr14	23834699	8.298	0.362	no	no
chr14	24025215	10.654	0.292	no	yes
chr14	24521633	8.968	3.2	no	yes
chr14	24550353	9.174	0.982	no	yes
chr14	24550785	8.128	2.558	no	yes
chr14	24658040	18.166	0.876	no	yes
chr14	24664779	63.626	0.578	yes	yes
chr14	24685304	23.014	0.584	no	yes
chr14	24740778	12.276	0.192	no	yes
chr14	24780133	14.892	0.386	yes	no
chr14	24803013	9.744	2.154	no	no
chr14	24898933	8.996	2.028	no	yes
chr14	24911821	12.586	0.876	no	yes
chr14	31676761	13.442	0.408	yes	yes
chr14	31889639	11.612	0.584	yes	yes
chr14	31889957	9.71	0.628	yes	yes
chr14	34420154	11.102	0	no	yes
chr14	35183732	7.524	0.328	no	no
chr14	35515860	9.38	0.828	no	yes
chr14	37131972	11.482	1.398	no	yes
chr14	38057521	12.318	0.576	no	yes
chr14	39736449	13.028	0	no	yes
chr14	45722240	9.186	0.584	yes	yes
chr14	45722616	11.806	0.058	yes	yes
chr14	49946332	8.852	0.268	no	yes
chr14	50065599	59.868	0	yes	yes
chr14	50101078	12.018	1.056	no	yes
chr14	50155033	9.606	0.65	yes	yes
chr14	50235175	12.722	1.152	no	yes
chr14	50329714	11.02	1.356	no	yes
chr14	50359481	10.182	0.292	yes	yes
chr14	50778683	10.498	1.288	no	yes
chr14	50998887	10.624	0.544	yes	yes
chr14	50999436	13.68	0	yes	yes
chr14	51707219	11.082	0.828	yes	yes
chr14	52118210	11.678	0.738	no	yes
chr14	53162186	9.306	0.876	yes	yes
chr14	53196888	9.512	0.236	no	yes
chr14	55032132	9.3	0.036	no	yes
chr14	55034690	10.014	1.168	no	no
chr14	55518279	12.21	0.584	yes	yes
chr14	55878463	12.85	0.27	no	no
chr14	57735196	8.254	0.292	no	yes
chr14	58666709	47.586	0.292	yes	yes
chr14	58765089	20.754	0.292	no	yes
chr14	59655794	11.098	0.676	no	yes
chr14	59950647	11.734	0.098	no	yes
chr14	60715694	9.784	0	yes	yes
chr14	61115890	8.934	0.584	no	no
chr14	61189371	8.362	0.066	no	no
chr14	61201421	9.402	0.092	no	yes
chr14	61788478	11.922	0.292	no	yes
chr14	62218039	11.6	2.92	no	yes
chr14	64194188	8.97	0.292	no	yes
chr14	64970374	12.638	0.018	yes	yes
chr14	64971024	12.562	0.352	yes	yes
chr14	64971528	8.816	0.032	yes	yes
chr14	64971955	11.204	0.584	yes	yes
chr14	64982044	10.25	0	no	no
chr14	65171929	9.122	0.606	no	yes
chr14	65879200	13.468	0.584	yes	yes
chr14	67708328	8.602	1.088	yes	yes
chr14	68141545	79.544	0	no	yes
chr14	69261138	11.912	0.196	yes	yes
chr14	69262825	11.434	0	no	yes
chr14	69446273	7.89	0.292	yes	yes
chr14	69819440	8.594	3.202	no	no
chr14	70041368	8.572	3.274	no	no
chr14	70826466	20.834	0.492	no	no
chr14	71374030	7.13	0	no	yes
chr14	73603300	13.75	0.876	no	no
chr14	74127380	15.366	0.292	no	no
chr14	74180618	8.966	0.01	yes	yes
chr14	74181036	11.6	0	yes	yes
chr14	74227027	12.79	0.76	yes	yes
chr14	74353595	13.364	0.02	no	yes
chr14	74829204	9.732	3.048	no	no
chr14	75348527	14.808	1.034	yes	yes
chr14	75517910	8.604	0.584	no	yes
chr14	75593767	12.514	0.292	no	no
chr14	75745316	12.41	0.132	no	yes
chr14	76002389	19.12	0.65	no	no
chr14	77278716	8.65	0.5	no	yes
chr14	77474353	13.024	0.188	no	no
chr14	77564488	11.218	0.154	no	yes
chr14	77787669	14.09	0.552	no	yes
chr14	79745270	8.83	0.678	no	yes
chr14	82780504	11.612	0	no	no
chr14	87900623	10.536	0	no	no
chr14	89290873	41.41	0.042	no	yes
chr14	89493710	11.15	1.402	no	no
chr14	90031789	6.97	2.782	no	no
chr14	90798257	13.178	0.894	no	yes
chr14	90849781	9.878	0.034	no	yes
chr14	90863425	8.546	0	yes	yes
chr14	91757508	15.57	0.292	no	no
chr14	91976821	12.032	0	yes	yes
chr14	92040492	13.364	0.874	yes	yes
chr14	92588188	9.302	0	no	yes
chr14	93186370	12.31	0	no	no
chr14	93214930	9.76	1.49	no	yes
chr14	93260593	73.744	0.464	no	yes
chr14	93650905	10.076	0.292	yes	yes
chr14	98243421	9.518	0.584	no	no
chr14	99738703	9.104	1.08	no	yes
chr14	99741138	13.288	1.232	no	yes
chr14	100045683	15.782	0.876	no	no
chr14	100199972	8.572	2.184	no	no
chr14	100259096	7.084	0.292	no	no
chr14	100433292	13.592	0.098	no	no
chr14	100680644	15.384	0.876	no	yes
chr14	100842574	17.326	0.832	no	yes
chr14	101169985	10.302	0.292	no	no
chr14	101972108	9.268	1.884	no	no
chr14	102094894	8.596	1.24	no	no
chr14	102553251	7.988	1.186	yes	yes
chr14	102553868	10.086	0	yes	yes
chr14	102783420	10.568	0	no	yes
chr14	102991109	11.234	1.512	no	yes
chr14	103395261	7.87	2.556	no	no
chr14	103397158	8.696	3.01	no	no
chr14	103541833	10.378	1.738	no	no
chr14	103570177	9.652	2.272	yes	yes
chr14	103746070	7.946	2.486	no	no
chr14	103800179	11.71	0.964	no	yes
chr14	103800604	10.348	0.292	no	yes
chr14	103851597	11.784	0.584	no	yes
chr14	103985114	15.026	0.292	no	no
chr14	103987359	9.328	0	no	no
chr14	104028813	9.514	0.274	yes	yes
chr14	105154537	12.068	1.668	no	yes
chr14	105182002	9.718	2.35	no	no
chr14	105189995	12.81	1.636	no	no
chr14	105199530	8.596	1.772	no	no
chr14	105282396	16.908	0.7	yes	yes
chr14	105399798	7.464	0.962	no	no
chr14	105512111	9.468	0.99	no	yes
chr14	105635501	7.28	2.044	no	yes
chr14	105669548	13.442	1.63	no	no
chr14	105766740	10.036	0.312	no	yes
chr14	105864794	8.904	0	yes	yes
chr14	105865429	13.11	3.056	no	no
chr14	105947408	14.28	0.102	no	yes
chr14	105948543	11.438	1.378	no	yes
chr14	105956127	10.218	0.998	no	yes
chr14	105957456	12.476	0.23	yes	yes
chr14	105967156	8.69	1.26	no	no
chr14	105994790	9.114	0.782	no	no
chr15	20547352	8.946	1.726	no	no
chr15	22833341	11.532	0.122	yes	yes
chr15	22892387	9.2	0.796	no	yes
chr15	23034241	13.58	0.292	no	yes
chr15	23791544	14.112	0.52	no	no
chr15	23810979	13.204	0.21	no	no
chr15	23811332	10.812	1.768	no	no
chr15	25018239	12.112	3.282	no	no
chr15	26371229	10.416	1.812	no	no
chr15	26874610	12.66	0.586	no	no
chr15	29396086	7.698	1.154	no	no
chr15	29464823	8.442	3.366	no	no
chr15	29561901	9.484	0.876	no	yes
chr15	30104624	9.6	0	no	no
chr15	31196106	11.256	0.466	yes	yes
chr15	31537529	8.656	2.304	no	no
chr15	33116134	10.112	1.064	no	no
chr15	34659828	12.758	0	yes	yes
chr15	34875303	8.198	0.902	no	yes
chr15	35262066	10.658	0	no	yes
chr15	35280617	16.382	0.626	yes	yes
chr15	35838575	45.634	1.038	no	yes
chr15	39187618	13.992	0	no	no
chr15	40401270	10.624	0.292	no	yes
chr15	40698202	10.41	0.566	no	no
chr15	41056448	10.156	1.82	yes	yes
chr15	41136370	9.57	0	no	yes
chr15	41149983	13.584	0	no	no
chr15	41166131	8.046	0.292	no	no
chr15	42066761	15.988	0	no	yes
chr15	42120376	15.426	0.156	no	yes
chr15	42130720	15.982	0.526	no	no
chr15	42432172	9.138	1.25	no	no
chr15	42500397	15.808	1.64	no	no
chr15	42840933	11.302	0.504	yes	yes
chr15	43477668	13.208	1.168	no	yes
chr15	43785229	10.772	0.292	no	no
chr15	44093037	16.002	0.584	no	no
chr15	44829334	8.858	0	yes	yes
chr15	44829721	9.712	0.292	yes	yes
chr15	45003919	10.01	0.31	yes	yes
chr15	45104388	7.03	0.676	no	yes
chr15	45459244	8.58	0	yes	yes
chr15	45695570	9.824	0.46	no	yes
chr15	45879506	14.294	0.436	no	yes
chr15	48623656	9.742	0.092	yes	yes
chr15	49338731	12.916	0.584	no	yes
chr15	49913299	13.274	0.304	no	yes
chr15	50647245	10.244	0.216	yes	yes
chr15	51915089	13.018	0.02	yes	yes
chr15	52122269	9.118	1.104	yes	yes
chr15	52861298	13.248	0.338	yes	yes
chr15	52970736	10.156	0	no	yes
chr15	52971285	13.488	1.168	no	yes
chr15	55611413	11.59	0.898	no	yes
chr15	57179514	13.062	0.5	yes	yes
chr15	57210693	9.588	0.18	no	yes
chr15	59981317	8.71	0.606	no	yes
chr15	62352513	9.656	0.35	no	yes
chr15	62683433	10.976	1.782	no	yes
chr15	64126192	11.788	0.584	no	yes
chr15	64385976	14.732	0.292	yes	yes
chr15	64443703	10.136	0.068	no	yes
chr15	64444189	8.19	1.89	no	no
chr15	64445975	13.864	0.4	no	yes
chr15	64648449	10.654	0.704	no	yes
chr15	64679957	15.024	0.724	no	yes
chr15	65370283	9.832	2.39	no	no
chr15	65477472	10.156	1.354	no	no
chr15	65588376	13.624	0	no	no
chr15	65597118	16.832	0	yes	no
chr15	65809583	9.512	0.476	no	yes
chr15	65809889	10.556	1.068	no	yes
chr15	65903521	14.954	0.19	no	yes
chr15	66790074	21.522	0.584	no	yes
chr15	67055784	11.486	0.596	no	no
chr15	67547079	21.372	0.292	yes	yes
chr15	67813898	11.412	0.292	yes	yes
chr15	68570021	14.586	0.466	no	yes
chr15	69706814	8.632	0.584	no	yes
chr15	72410171	10.878	0.988	no	yes
chr15	72523322	12.872	0.8	yes	yes
chr15	74284528	11.69	0.476	yes	yes
chr15	74725929	12.484	2.822	no	yes
chr15	74890885	12.106	0.048	no	no
chr15	74908179	14.642	0.292	no	no
chr15	75660922	18.162	0.694	no	yes
chr15	75932273	14.996	0	yes	yes
chr15	76196195	12.158	0.622	no	yes
chr15	78591782	11.914	0.946	no	yes
chr15	78730970	9.508	1.134	no	yes
chr15	78799952	18.25	1.262	no	yes
chr15	79164836	11.116	1.614	no	no
chr15	79223499	19.502	0.544	no	yes
chr15	80070862	16.59	0.458	no	no
chr15	80189257	12.942	0.154	yes	yes
chr15	80988219	9.28	0.292	yes	yes
chr15	81097458	9.774	0	no	yes
chr15	81680836	19.902	0.292	no	no
chr15	82337861	9.412	0.816	no	yes
chr15	82339662	15.548	0.968	yes	yes
chr15	83349423	11.722	1.448	no	yes
chr15	83478457	10.048	1.166	yes	yes
chr15	83621066	7.994	0.692	no	yes
chr15	83680499	16.866	0.598	no	yes
chr15	83736109	11.482	0	yes	yes
chr15	84115771	11.786	2.136	no	yes
chr15	85177020	11.426	0.18	no	yes
chr15	85259196	11.308	0.876	no	yes
chr15	85523678	11.566	0.292	yes	yes
chr15	85524629	12.502	0.646	yes	yes
chr15	85874586	16.606	0.292	no	no
chr15	86946549	11.306	0.196	no	no
chr15	89010851	15.01	0	no	yes
chr15	89089900	10.128	0.42	no	yes
chr15	89164725	10.228	0	no	yes
chr15	89182209	13.724	1.384	no	yes
chr15	89673089	16.038	0	no	no
chr15	89787059	14.5	0.218	yes	yes
chr15	89878189	14.2	0.23	no	yes
chr15	89921863	20.516	0.246	no	yes
chr15	90437201	15.45	0.126	no	yes
chr15	90777108	10.192	0.29	no	yes
chr15	91072627	8.588	0.862	no	yes
chr15	91445646	12.166	0.278	no	yes
chr15	91473184	12.374	0.292	no	yes
chr15	91475766	11.808	0.292	no	yes
chr15	91498054	13.166	1.13	no	yes
chr15	91538149	14.82	0.292	yes	yes
chr15	91565840	13.034	0.26	no	yes
chr15	93070619	17.726	0.296	no	no
chr15	93182528	14.95	1.138	no	yes
chr15	93197534	26.066	0.122	no	no
chr15	93352496	12.622	0.19	yes	yes
chr15	93447713	18.864	0.514	yes	yes
chr15	94774692	13.578	0	no	yes
chr15	96900388	19.144	1.498	no	yes
chr15	99192315	9.434	0.272	yes	yes
chr15	99332341	12.1	0.876	no	no
chr15	99347136	13.188	0.15	no	no
chr15	99558338	8.802	0	yes	yes
chr15	99645080	10.636	0.71	no	yes
chr15	99645415	10.346	1.924	no	yes
chr15	99791853	9.588	0.21	no	yes
chr15	100106208	10.13	0.758	yes	yes
chr15	100273404	9.29	1.964	no	no
chr15	100468826	11.936	1.774	no	no
chr15	100882229	13.774	0.954	no	yes
chr15	100890066	12.372	0.098	no	no
chr15	100989548	11.554	1.766	no	no
chr15	101438186	18.46	0.768	no	no
chr15	101835447	14.228	0.934	no	yes
chr15	102192501	13.25	0.044	no	yes
chr15	102390459	12.582	0.03	no	no
chr16	128106	10.446	0.292	no	yes
chr16	231342	17.548	0.318	no	no
chr16	420586	10.068	0.292	no	no
chr16	452025	8.088	0.046	no	yes
chr16	475142	12.958	0.094	no	yes
chr16	577231	9.586	0	no	yes
chr16	577506	9.634	0	no	yes
chr16	636771	12.88	1.824	no	no
chr16	637347	11.418	1.792	no	no
chr16	679627	8.056	0.292	no	no
chr16	681257	8.556	0.712	no	no
chr16	691625	9.516	0.584	no	yes
chr16	698159	10.97	0.292	no	no
chr16	698344	11.776	0.138	no	no
chr16	698985	21.086	0	no	no
chr16	710618	6.53	1.494	no	no
chr16	718182	10.964	0.292	no	yes
chr16	725217	7.198	1.168	no	no
chr16	731377	16.878	0.538	no	yes
chr16	731974	11.52	0.634	no	no
chr16	733940	20.878	0.292	no	no
chr16	734422	17.402	0.292	no	no
chr16	740332	14.414	0.978	no	no
chr16	766314	11.924	0	no	yes
chr16	771639	13.412	1.014	no	yes
chr16	772219	13.578	0	no	no
chr16	776777	14.302	0.56	no	yes
chr16	777571	11.952	0.43	no	no
chr16	778674	17.38	0	yes	yes
chr16	791008	12.396	0.292	no	yes
chr16	834364	7.776	1.642	no	no
chr16	845769	12.63	0	no	no
chr16	857625	7.802	0.842	no	yes
chr16	1020538	10.824	0	no	no
chr16	1128678	13.426	0.736	no	yes
chr16	1359321	19.032	0	no	yes
chr16	1401963	8.918	0	no	yes
chr16	1429128	9.934	0.49	no	yes
chr16	1525330	11.698	0.876	no	yes
chr16	1660458	10.388	0.36	no	yes
chr16	1755948	18.534	0.876	no	yes
chr16	1819146	10.18	0.036	no	no
chr16	1820608	22.04	0.224	no	no
chr16	1821845	10.224	0.774	no	no
chr16	1822431	8.734	0.548	no	yes
chr16	1823066	13.406	0.02	no	yes
chr16	1823588	9.906	0.228	no	yes
chr16	1829469	11.654	0.364	no	no
chr16	1830474	12.06	0.574	no	no
chr16	1831955	16.358	0.116	no	yes
chr16	2030163	8.64	3.194	no	no
chr16	2033880	11.19	0.884	yes	yes
chr16	2097860	10.112	0	no	yes
chr16	2288502	9.818	0	no	no
chr16	2301847	17.97	0.292	yes	yes
chr16	2318681	8.032	0.066	yes	yes
chr16	2391052	9.06	0.508	no	yes
chr16	2509664	9.568	2.198	no	no
chr16	2517643	6.798	2.082	yes	yes
chr16	2523551	10.732	2.668	no	no
chr16	2524264	9.788	1.138	no	no
chr16	2570387	25.184	0	no	no
chr16	2582147	20.826	0	no	yes
chr16	2582609	10.116	0.584	no	no
chr16	2653393	18.602	0.53	no	yes
chr16	2732466	14.436	0.894	no	yes
chr16	2802368	13.022	0	yes	yes
chr16	2918485	11.722	0.584	no	no
chr16	2933365	8.644	1.752	no	yes
chr16	2955315	10.794	0.584	no	yes
chr16	3020028	13.48	1.46	no	yes
chr16	3074264	13.032	0.366	yes	yes
chr16	3078273	8.71	0	no	yes
chr16	3109196	7.36	0.292	no	no
chr16	3156518	8.14	0.38	no	yes
chr16	3174563	11.38	0.02	no	yes
chr16	3194612	7.572	3.162	no	no
chr16	3202546	10.156	0.292	no	yes
chr16	3333103	10.814	0	yes	yes
chr16	3355359	14.248	1.22	no	yes
chr16	3355675	18.34	0.782	no	yes
chr16	3450867	11.196	0.584	no	no
chr16	3451409	11.13	0	no	no
chr16	3550885	18.192	0.584	no	yes
chr16	3767764	14.508	0.292	yes	yes
chr16	4233548	12.802	0	yes	yes
chr16	4303733	10.63	0	yes	yes
chr16	4304149	13.404	0.584	yes	yes
chr16	4321870	10.686	0.642	no	yes
chr16	4323637	13.682	0	no	yes
chr16	4384889	8.184	2.676	no	no
chr16	4419186	14.23	0.292	no	no
chr16	4466467	7.808	0.292	no	no
chr16	4664028	7.98	1.96	no	yes
chr16	4666348	9.01	0	yes	yes
chr16	4666670	9.04	0	yes	yes
chr16	4674563	11.072	0	no	yes
chr16	4729796	10.47	0.292	no	no
chr16	4743454	10.944	0.306	no	yes
chr16	4744214	11.404	0.674	no	no
chr16	4784738	8.426	0.98	no	yes
chr16	4853031	8.332	0.292	no	yes
chr16	4897228	9.104	0.2	no	yes
chr16	5083822	16.47	0.326	no	yes
chr16	8223232	7.73	1.186	no	no
chr16	10782288	7.748	3.06	no	no
chr16	11036463	8.172	1.256	no	no
chr16	11038338	9.476	0.268	no	yes
chr16	11376369	8.232	3.46	no	no
chr16	11480870	8.758	3.156	no	no
chr16	11836628	7.888	0.282	no	yes
chr16	12009861	7.888	0.55	no	yes
chr16	18812865	13.95	0.816	no	yes
chr16	19729548	9.984	0.506	yes	yes
chr16	20753090	13.974	0	no	yes
chr16	21171089	13.348	0.616	no	yes
chr16	21312986	12.888	0.288	no	yes
chr16	21610816	11.71	0.324	yes	yes
chr16	22201566	9.616	0.968	no	yes
chr16	22217775	9.442	0.848	yes	yes
chr16	22308455	9.652	0	no	yes
chr16	22308822	12.534	0	no	yes
chr16	23193746	10.876	2.574	no	no
chr16	23313890	13.936	3.432	no	yes
chr16	23607610	15.4	0.442	no	yes
chr16	23690155	11.836	0	no	yes
chr16	24550628	11.824	0	no	yes
chr16	24941990	10.338	0.064	no	no
chr16	25118389	11.862	0	no	yes
chr16	25269583	16.58	0	no	yes
chr16	28565361	12.688	0	no	yes
chr16	28833904	16.188	0.442	yes	yes
chr16	28857773	10.606	0.586	no	yes
chr16	28891042	7.274	0.292	no	yes
chr16	28914366	7.18	0.952	no	no
chr16	28957124	11.094	0.79	no	yes
chr16	28986324	10.972	0.584	no	yes
chr16	29817099	25.064	0.578	yes	yes
chr16	29818970	11.482	0.988	yes	yes
chr16	29819572	10.064	1.168	no	no
chr16	29822957	28.26	0.514	no	yes
chr16	30007378	10.606	0.014	yes	yes
chr16	30018288	8.816	1.772	no	no
chr16	30076645	14.104	0.584	yes	yes
chr16	30103359	12.81	0	no	yes
chr16	30418628	9.178	0	no	yes
chr16	30429117	23.394	0.108	no	yes
chr16	30545728	9.048	0.812	no	no
chr16	30569647	9.574	0	no	yes
chr16	30596679	12.962	1.578	no	yes
chr16	30709455	23.518	0.596	no	yes
chr16	30710146	8.522	0.876	no	yes
chr16	30759539	10.228	0	no	yes
chr16	30786850	31.956	0.698	yes	yes
chr16	30816942	7.564	0.696	no	yes
chr16	30886605	13.554	0	yes	yes
chr16	30905704	9.636	0.584	yes	yes
chr16	30960529	14.694	0	no	no
chr16	30969144	9.948	0	yes	yes
chr16	30996427	12.16	1.304	no	no
chr16	31000261	7.402	0.85	no	no
chr16	31084673	14.45	0.518	no	yes
chr16	31085146	11.74	0	no	yes
chr16	31085688	12.352	0.292	no	yes
chr16	31106025	10.444	0.168	yes	yes
chr16	31191334	13.222	0.198	no	yes
chr16	31191966	7.71	0	yes	yes
chr16	31212825	6.736	0.022	no	no
chr16	31454475	10.846	0.834	no	yes
chr16	31499823	16.018	2.994	no	no
chr16	31724736	19.278	0.808	no	no
chr16	46917746	12.054	0.248	no	yes
chr16	47071780	8.342	0.292	no	yes
chr16	48419614	7.482	0.876	yes	yes
chr16	49526227	8.408	2.992	no	no
chr16	50059089	10.296	0.116	no	yes
chr16	54319612	9.942	0.632	yes	yes
chr16	54574887	10.216	0.794	no	no
chr16	54964413	8.216	0.292	no	yes
chr16	54965231	6.776	0.292	yes	yes
chr16	56966103	11.718	0.292	no	yes
chr16	57180902	7.086	0.418	no	no
chr16	57279245	11.026	0.166	yes	yes
chr16	57496600	15.552	0.292	no	yes
chr16	58060046	9.762	0.926	no	yes
chr16	58284013	8.928	0.292	no	no
chr16	58426373	12.65	0.742	yes	yes
chr16	58549505	17.858	1.626	no	yes
chr16	66785637	22.29	0	no	yes
chr16	66907071	10.762	0.674	no	no
chr16	66914566	12.694	0.326	no	yes
chr16	66968280	11.692	0.42	no	no
chr16	67189265	10.976	0.512	no	yes
chr16	67208294	15.722	0.526	no	yes
chr16	67208624	10.906	0.48	no	yes
chr16	67212227	16.83	0.292	no	yes
chr16	67233186	16.776	0.376	no	no
chr16	67563087	11.648	0.292	no	yes
chr16	67597211	9.304	0.304	yes	yes
chr16	67701096	11.918	0	no	no
chr16	67880618	9.58	0.292	yes	yes
chr16	67907009	19.786	0.234	no	yes
chr16	67969955	17.88	1.126	no	no
chr16	68268126	16.906	0	no	yes
chr16	68298900	10.032	0	yes	yes
chr16	68482630	11.076	1.346	no	yes
chr16	68482797	11.044	1.752	no	yes
chr16	68573363	9.57	0	no	yes
chr16	69140781	8.004	0.534	no	no
chr16	69220889	8.428	0.38	no	yes
chr16	69345742	13.684	0	no	yes
chr16	69364539	18.358	0	yes	yes
chr16	69599783	18.598	0.206	no	no
chr16	70285767	29.978	0.292	no	yes
chr16	70323304	10.4	0.338	no	yes
chr16	70380810	13.164	0	no	yes
chr16	70414521	11.16	0.978	no	yes
chr16	70473285	10.26	0.584	no	no
chr16	70557495	25.972	0.292	yes	yes
chr16	70835205	9.958	0.49	no	yes
chr16	71496162	10.324	0.55	no	no
chr16	71929325	10.17	0.168	no	yes
chr16	71929611	10.784	0.496	no	yes
chr16	74330602	11.516	0	no	yes
chr16	74700554	8.966	0	no	yes
chr16	75300050	8.762	0	no	no
chr16	75467008	12.604	0.208	no	yes
chr16	77270045	11.56	2.516	no	no
chr16	78079926	7.614	3.43	no	yes
chr16	78133468	15.096	0.196	yes	yes
chr16	78157139	12.994	0	no	no
chr16	81110998	13.694	0.258	no	yes
chr16	82186419	17.128	0.584	no	yes
chr16	84225276	7.108	1.69	no	no
chr16	84947085	12.748	0.292	no	no
chr16	85045208	11.256	0.292	no	yes
chr16	85525752	13.05	0	no	yes
chr16	85554542	14.19	0	no	yes
chr16	85604231	11.034	0.216	no	yes
chr16	85855272	12.102	2.448	no	no
chr16	86589090	9.318	1.22	no	yes
chr16	87350814	10.99	0.876	yes	yes
chr16	87350959	11.068	0.876	yes	yes
chr16	87417633	9.06	0	no	yes
chr16	87799513	10.416	1.342	no	yes
chr16	87984668	12.586	0	no	yes
chr16	88520506	7.774	0.108	no	yes
chr16	88521673	10.524	0.292	yes	yes
chr16	88594022	9.458	0.25	no	yes
chr16	88600830	7.2	0	no	no
chr16	88601454	7.754	0.456	no	no
chr16	88636851	10.046	0.608	yes	yes
chr16	88729975	9.01	0	no	yes
chr16	88772939	10.858	1.438	yes	yes
chr16	88851999	10.022	0.816	no	yes
chr16	88873590	11.392	0	no	no
chr16	88874372	8.122	0.47	no	no
chr16	88878521	14.712	0.028	yes	yes
chr16	89220596	15.68	0.584	no	yes
chr16	89222789	9.28	2.63	no	no
chr16	89223131	10.136	1.626	no	no
chr16	89234073	10.218	2.752	no	no
chr16	89245284	7.74	2.254	no	no
chr16	89283967	11.504	0	no	yes
chr16	89307803	11.454	0.854	no	no
chr16	89626892	10.814	0.292	no	yes
chr16	89627277	11.322	0.148	no	yes
chr16	89631873	18.898	0.292	no	no
chr16	89763491	8.49	0.292	no	no
chr16	89784745	10.97	1.216	no	no
chr16	89785966	12.364	1.314	no	no
chr16	89787482	22.632	0.614	no	yes
chr16	89788897	13.132	0.608	no	yes
chr16	89789351	11.14	0.306	no	no
chr16	89939790	10.588	1.028	no	yes
chr16	89984387	10.802	2.7	no	yes
chr16	90038785	18.582	0	no	yes
chr16	90039181	12.248	0.274	no	yes
chr16	90148383	11.856	1.224	no	yes
chr16	90148695	12.584	1.34	no	yes
chr17	236222	8.282	1.752	no	yes
chr17	617997	9.046	0.584	no	yes
chr17	636414	10.57	0.53	yes	yes
chr17	655437	10.618	0.876	no	yes
chr17	685527	16.316	1.014	yes	yes
chr17	1090654	11.346	1.022	no	no
chr17	1107028	7.44	0.544	no	yes
chr17	1303387	10.212	0.584	yes	yes
chr17	1420268	12.42	0.292	yes	yes
chr17	1532251	8.112	0	no	yes
chr17	1552896	10.242	0.876	no	yes
chr17	1553334	11.554	0.292	no	yes
chr17	1933454	10.068	0.292	no	no
chr17	1945349	18.498	0	no	yes
chr17	2296658	11.91	0	yes	yes
chr17	2305118	11.3	0.292	no	yes
chr17	2496653	7.198	0.584	yes	yes
chr17	2653266	11.358	2.486	no	yes
chr17	2907772	11.56	0.292	no	yes
chr17	3571726	11.57	0.152	no	yes
chr17	3627096	14.934	1.342	no	yes
chr17	3749389	10.856	0.68	no	yes
chr17	3791947	12.406	0.164	yes	no
chr17	4047152	10.412	0.292	no	yes
chr17	4167188	9.222	1.272	no	yes
chr17	4269797	7.686	0.036	yes	yes
chr17	4439556	8.296	1.978	no	no
chr17	4607380	10.016	0	no	yes
chr17	4642778	9.494	0.846	no	yes
chr17	4693187	9.67	0.584	yes	yes
chr17	4870897	14.436	0.292	no	yes
chr17	4890892	9.124	0.584	no	no
chr17	5372246	11.11	0.674	no	yes
chr17	5390037	13.102	0	yes	yes
chr17	6325533	10.946	3.162	no	yes
chr17	6544383	14.742	0.292	no	yes
chr17	6586659	9.588	0.876	no	no
chr17	6918161	19.71	0.584	no	yes
chr17	7123326	19.998	0.876	no	yes
chr17	7137842	43.406	0	yes	yes
chr17	7146405	19.648	1.012	yes	yes
chr17	7164318	14.038	0.292	no	yes
chr17	7218800	14.876	0.03	yes	yes
chr17	7475957	14.5	0.102	no	yes
chr17	7477186	10.348	0.624	no	yes
chr17	7482554	17.624	0.516	no	no
chr17	7591572	10.594	0	no	yes
chr17	7745671	11.992	0.292	no	no
chr17	7755113	13.524	0.102	no	no
chr17	7759856	12.242	0.4	no	no
chr17	7760489	23.466	0.444	yes	yes
chr17	7960467	12.82	0	no	no
chr17	7970467	17.504	0.584	no	no
chr17	7970907	14.016	0.292	no	no
chr17	7971386	12.976	0	no	no
chr17	7973025	16.624	1.202	no	no
chr17	7983003	12.016	3.278	no	no
chr17	8057792	15.76	0.08	no	yes
chr17	8076828	26.804	0	yes	no
chr17	8093265	8.44	0.188	no	no
chr17	8191848	13.21	0.26	no	yes
chr17	8280139	28.822	0	no	no
chr17	8534905	10.992	0	no	yes
chr17	8649607	12.256	2.85	no	no
chr17	12921200	10.124	0.292	no	yes
chr17	13973045	8.666	0.584	no	yes
chr17	14204766	14.826	2.132	no	no
chr17	14212589	11.782	3.42	no	yes
chr17	16284371	10.844	0.58	no	yes
chr17	16290068	7.122	0.292	no	yes
chr17	16922072	13.86	0.292	no	no
chr17	17140614	9.96	0.21	no	yes
chr17	17398829	8.874	1.46	no	no
chr17	17495034	15.004	0.044	no	yes
chr17	17713822	10.164	0.588	no	no
chr17	17716154	12.336	0.292	no	no
chr17	17743785	10.958	0.248	yes	yes
chr17	17991159	10.07	0.224	no	yes
chr17	18033817	8.638	1.46	no	no
chr17	18086557	16.946	0.584	yes	yes
chr17	18171711	9.19	0	no	no
chr17	19552157	10.902	0.488	no	yes
chr17	20811959	6.84	0.292	yes	yes
chr17	20946886	8.04	0.812	yes	yes
chr17	21220046	20.722	1.988	no	no
chr17	21454553	9.056	1.514	no	no
chr17	25607582	9.086	2.78	no	no
chr17	25620945	10.518	0.446	no	yes
chr17	25680736	7.79	0.866	no	yes
chr17	26120946	12.138	2.118	no	no
chr17	26662644	12.022	0.432	no	yes
chr17	26732879	8.492	0	no	no
chr17	26879562	9.158	1.528	no	no
chr17	26926048	12.392	0.584	yes	yes
chr17	26972340	8.272	0	no	yes
chr17	27038195	9.216	0.584	no	yes
chr17	27052514	18.62	2.28	no	no
chr17	27052915	13.4	0.402	yes	yes
chr17	27169926	11.834	0.292	no	yes
chr17	27224537	19.336	0	no	yes
chr17	27268516	10.086	0	no	no
chr17	27893750	8.338	0.878	yes	yes
chr17	28927665	7.954	0.292	no	yes
chr17	29233332	12.27	0.434	no	yes
chr17	29876701	10.184	0.004	no	no
chr17	29877169	12.076	0	no	yes
chr17	30334381	7.316	0.35	no	no
chr17	30669198	11.182	0.884	no	yes
chr17	30771352	10.15	0.832	no	yes
chr17	30772031	8.252	0.876	no	yes
chr17	33307514	7.32	1.18	no	no
chr17	33469426	10.196	1.14	no	yes
chr17	34091242	11.77	0	no	yes
chr17	34136518	9.248	0.584	no	yes
chr17	34901025	8.366	0.518	yes	no
chr17	34901453	9.254	0	yes	yes
chr17	34958236	15.814	1.108	no	yes
chr17	35087715	14.546	0.292	no	yes
chr17	35715999	8.668	0.626	no	yes
chr17	35849406	12.372	0	yes	yes
chr17	35969498	12.86	0	no	yes
chr17	36714525	10.49	2.294	no	no
chr17	36762805	8.438	0.728	no	no
chr17	36956131	9.03	0.292	no	yes
chr17	37824834	7.53	1.832	no	no
chr17	37886648	10.236	0.158	no	no
chr17	38137149	14.734	0.584	no	no
chr17	38443953	12.518	0.144	yes	yes
chr17	38474798	10.95	0	no	no
chr17	39114594	10.39	0	no	no
chr17	39822207	15.818	0.414	no	no
chr17	40021619	12.442	0.292	no	no
chr17	40540769	27.118	0.584	no	yes
chr17	40706676	12.69	0.108	no	yes
chr17	40828188	10.468	0.876	no	no
chr17	40932407	7.842	3.102	no	no
chr17	41174031	8.982	0	no	no
chr17	41393332	16.524	0	no	yes
chr17	41438636	55.616	0	yes	yes
chr17	41445432	14.082	1.014	no	no
chr17	41476406	9.166	0.584	no	no
chr17	42015563	7.676	0.584	no	no
chr17	42092313	9.15	0.064	no	yes
chr17	42154335	12.276	0.166	no	no
chr17	42767125	21.252	0.244	no	yes
chr17	42976905	71.75	0.584	no	yes
chr17	43212826	13.262	0.584	no	no
chr17	43226010	17.94	0.132	no	yes
chr17	43227462	20.81	1.132	no	yes
chr17	43394660	17.72	0.594	yes	yes
chr17	43972924	10.02	2.476	no	no
chr17	44271219	16.848	0.416	yes	yes
chr17	45000374	61.3	1.396	no	no
chr17	45726681	14.27	0	yes	yes
chr17	45727309	14.286	0	yes	yes
chr17	45928492	9.128	1.042	no	yes
chr17	45961655	9.828	0.624	no	no
chr17	45973404	11.196	0.174	no	yes
chr17	46048210	10.922	0	no	yes
chr17	46703558	8.864	2.736	no	yes
chr17	46714006	8.846	1.79	no	yes
chr17	46755881	11.564	1.568	no	no
chr17	46801162	13.504	0.292	no	no
chr17	47022265	12.91	1.236	no	yes
chr17	47270008	10.878	0.02	no	yes
chr17	47647543	11.478	1.416	yes	yes
chr17	47785442	81.326	0.02	no	yes
chr17	48133053	9.582	2.092	no	no
chr17	48169724	7.388	3.318	no	no
chr17	48227871	7.86	2.112	no	no
chr17	48238764	12.386	1.692	yes	yes
chr17	48609965	13.446	0.086	no	yes
chr17	48611748	11.222	0.37	no	yes
chr17	48620380	13.246	0	no	no
chr17	48638140	10.818	2.87	no	no
chr17	48943641	10.7	0.292	yes	yes
chr17	48981961	12.812	0.814	no	yes
chr17	49022018	10.376	0	yes	yes
chr17	49230883	14.196	0.584	no	yes
chr17	49244338	7.652	0.816	no	yes
chr17	53499022	8.588	0.584	no	yes
chr17	53685241	10.97	0	no	no
chr17	53828638	9.35	0.584	no	no
chr17	54857875	11.358	0.884	no	yes
chr17	54911821	10.934	1.14	no	yes
chr17	55038315	8.082	0.584	no	yes
chr17	56066018	25.314	0.584	no	no
chr17	56084408	12.294	0	yes	yes
chr17	56327045	10.888	1.46	no	no
chr17	56429550	13.31	0.29	yes	yes
chr17	56709154	17.72	0	no	yes
chr17	56736530	19.618	0.292	no	yes
chr17	56757055	12.578	0.876	no	no
chr17	57287404	10.92	0	no	yes
chr17	57696717	11.586	0.842	no	yes
chr17	58678165	10.496	0.016	no	yes
chr17	59473559	7.93	3.496	no	no
chr17	59489937	10.808	0.972	no	yes
chr17	61678249	11.258	0.584	no	yes
chr17	61699077	8.396	0	no	yes
chr17	61776635	7.942	2.724	no	no
[truncated: 2,605 more rows]
