# Supplementary material for: Integrative Analysis Reveals the Transcriptional Collaboration between EZH2 and E2F1 in the Regulation of Cancer-Related Gene Expression
Source: Oxford University Press journal article supplement (doi:10.1158/1541-7786.mcr-15-0313), 2015-12-10
Supplement: 15417786mcr150313-sup-152701_1_supp_3153326_nv0fpn.xlsx [file 15417786mcr150313-sup-152701_1_supp_3153326_nv0fpn.xlsx]

## Sheet: 56 signature gene
Suppl. Table 2: 56 signature genes induced by EZH2 and bound by EZH2 solo peaks in abl.
Gene symbol	log2 fold-change upon EZH2 KD in abl	FDR in EZH2 KD microarray	down-regulated upon EZH2 silencing in DLBCL lines
ARL6IP1	-0.599407	0.00258913	no
ATAD2	-0.858045	0.00136137	yes
BIRC5	-1.04117	0.0010709	yes
BNIP2	-0.64445	0.0298338	yes
BRIX1	-0.592096	0.00583375	yes
BTG3	-0.595466	0.00270516	no
CCNA2	-1.27509	0.00177509	yes
CCNE2	-0.839684	0.00143253	yes
CDC6	-0.943634	0.00164169	yes
CDK1	-1.28003	0.0010414	yes
CENPK	-1.20402	0.000736707	yes
CHEK1	-1.01036	0.0010709	yes
CKS2	-0.910466	0.00195718	yes
CNOT6	-0.626895	0.0110898	no
DSCC1	-0.644162	0.00699327	yes
FANCI	-0.880355	0.0010709	yes
FOXM1	-0.871761	0.0010709	yes
GGH	-0.678776	0.00355979	yes
GLOD4	-0.637415	0.00995574	yes
GPSM2	-0.743417	0.00359671	no
GUCY1B3	-0.915442	0.00659648	no
H1F0	-0.614478	0.00136137	no
H1FX	-0.633544	0.013394	no
H2AFX	-0.789862	0.00136137	yes
HMGB2	-1.3302	0.00211098	yes
HMMR	-1.01591	0.00848488	yes
IER5	-0.739376	0.00118803	no
KIF23	-0.91365	0.00143837	yes
MMD	-0.595118	0.0176285	no
MND1	-1.1261	0.0010414	yes
MRPL20	-0.60121	0.0200367	yes
MTFR2	-0.665589	0.00141763	yes
NCAPG	-1.07734	0.00215715	yes
NCAPG2	-0.918315	0.00210294	no
NDC1	-0.656904	0.0029135	yes
NME1	-1.01062	0.0272903	yes
NMU	-1.11068	0.000703302	yes
NUF2	-1.53438	0.00213701	yes
PA2G4	-0.689971	0.013576	yes
PBK	-1.41137	0.00143837	yes
PLK1	-0.903705	0.00620652	yes
POLE2	-0.60352	0.0120499	yes
PPIH	-0.593299	0.00886701	yes
PRC1	-1.13943	0.00248484	yes
RFC2	-0.609281	0.0043319	yes
RFWD3	-0.586723	0.00211098	no
RRM1	-0.924724	0.00345135	yes
SMC2	-0.855296	0.00255795	yes
SMC4	-0.905187	0.00458959	yes
SNRPA1	-0.816137	0.00476632	yes
SPAG5	-0.967544	0.000587315	yes
TACC3	-1.1828	0.000822615	yes
TMPO	-0.648922	0.0121642	yes
TRIP13	-0.865423	0.000736707	yes
TYMS	-1.03268	0.000587315	yes
WDR34	-0.618974	0.0010414	yes
