# Supplementary material for: Integrative Analysis Reveals the Transcriptional Collaboration between EZH2 and E2F1 in the Regulation of Cancer-Related Gene Expression
Source: Oxford University Press journal article supplement (doi:10.1158/1541-7786.mcr-15-0313), 2015-12-10
Supplement: 15417786mcr150313-sup-152701_1_supp_3153329_nv0fpn.xlsx [file 15417786mcr150313-sup-152701_1_supp_3153329_nv0fpn.xlsx]

## Sheet: abl_vs_LNCaP.hg19.cnv.bedgraph
Suppl. Table 7: A Genome-wide mapping of relative copy number changes between abl and LNCaP.
chrom	start	end	log2 fold-change
chr1	10005	10771	0.352
chr1	11428	13974	-0.264
chr1	13987	16701	-0.156
chr1	16733	28962	-0.142
chr1	29748	33403	-0.083
chr1	33452	38223	-0.138
chr1	38243	38900	-0.205
chr1	38911	40257	-0.068
chr1	40321	41967	-0.145
chr1	42001	44705	-0.004
chr1	45126	51704	-0.056
chr1	52294	53975	-0.043
chr1	54019	57949	-0.049
chr1	58789	61307	0.077
chr1	62235	66112	-0.123
chr1	66805	68869	-0.013
chr1	68910	71799	0.003
chr1	71885	73959	-0.216
chr1	73998	77405	-0.136
chr1	79067	86477	-0.018
chr1	86479	99013	-0.171
chr1	99111	106140	-0.246
chr1	106575	114931	-0.152
chr1	116568	119185	-0.079
chr1	119479	120301	-0.106
chr1	121713	123129	0.082
chr1	123778	124847	-0.033
chr1	126810	128403	0.161
chr1	128834	129903	-0.05
chr1	129984	134056	-0.277
chr1	134090	134982	-0.084
chr1	138353	139565	-0.308
chr1	139993	141432	0.059
chr1	141795	144403	-0.188
chr1	144589	150333	-0.138
chr1	150601	152851	-0.136
chr1	153687	155091	-0.167
chr1	155255	155849	0.088
chr1	157126	161452	-0.207
chr1	161506	163789	-0.159
chr1	163848	164640	-0.25
chr1	165308	166023	-0.083
chr1	166102	167583	-0.307
chr1	167653	168336	0.095
chr1	168991	170066	-0.048
chr1	170693	171496	-0.122
chr1	173731	174416	-0.209
chr1	176394	177098	0.009
chr1	227928	229161	-0.181
chr1	230838	235911	-0.14
chr1	235939	239703	-0.078
chr1	239747	241312	-0.229
chr1	241384	245352	-0.122
chr1	245425	249862	-0.067
chr1	249938	251134	-0.194
chr1	251156	254906	-0.172
chr1	254991	255619	0.047
chr1	256043	261986	-0.088
chr1	262037	264802	0.095
chr1	265859	266980	-0.166
chr1	317783	318894	-0.212
chr1	318916	320182	0.128
chr1	320237	324539	-0.072
chr1	328316	329884	0.019
chr1	330708	331379	-0.329
chr1	331381	333647	-0.067
chr1	333688	334737	-0.214
chr1	335001	335981	-0.185
chr1	336382	337008	0.166
chr1	337512	338702	-0.006
chr1	338712	339937	-0.261
chr1	340285	341587	0.121
chr1	342808	343812	-0.125
chr1	344250	348385	-0.147
chr1	348441	349547	-0.098
chr1	349614	351938	-0.146
chr1	352822	355234	-0.083
chr1	355723	356350	-0.127
chr1	356351	357259	0.048
chr1	357475	358286	0.113
chr1	358706	360977	-0.037
chr1	361033	365424	-0.047
chr1	365425	366031	0.16
chr1	366985	369109	-0.04
chr1	369420	371800	-0.019
chr1	371821	379236	-0.231
chr1	379239	380388	-0.405
chr1	380858	382071	-0.429
chr1	382476	383607	-0.332
chr1	383620	385034	-0.16
chr1	385887	387056	-0.395
chr1	387868	392421	0.089
chr1	392919	395803	-0.139
chr1	396165	398308	-0.043
chr1	400123	401364	0.21
chr1	402181	403116	0.037
chr1	403124	404354	-0.082
chr1	404444	404951	-0.255
chr1	404993	405877	-0.158
chr1	405965	407340	-0.269
chr1	407937	409670	-0.3
chr1	409870	416184	-0.157
chr1	416329	417374	0.026
chr1	417426	418244	0.112
chr1	418953	422370	-0.148
chr1	423122	424206	-0.166
chr1	425079	429048	-0.166
chr1	429060	432853	-0.161
chr1	433364	436141	-0.233
chr1	436366	437238	-0.37
chr1	438534	441598	-0.404
chr1	443139	445317	-0.214
chr1	445534	446436	-0.193
chr1	446917	447643	0.086
chr1	447701	448428	-0.152
chr1	448431	449070	-0.42
chr1	449106	456071	-0.241
chr1	456247	457103	-0.165
chr1	457110	458821	0.042
chr1	458844	459681	-0.218
chr1	459947	462088	-0.326
chr1	462310	471351	-0.075
chr1	521421	523452	-0.31
chr1	523551	527149	-0.223
chr1	527693	536227	-0.353
chr1	536511	537443	-0.328
chr1	537531	539697	-0.198
chr1	540915	544777	-0.366
chr1	546529	548247	-0.711
chr1	548535	561052	-0.329
chr1	561180	561899	-0.384
chr1	562036	562889	-0.307
chr1	562927	563612	-0.183
chr1	563634	580610	-0.381
chr1	580936	582870	-0.434
chr1	582872	591518	-0.148
chr1	591785	593349	-0.06
chr1	593353	594512	-0.304
chr1	594634	597668	0.005
chr1	598376	600261	-0.093
chr1	600332	600836	-0.413
chr1	601254	602840	-0.181
chr1	603417	606082	-0.394
chr1	606316	608807	-0.149
chr1	609478	610459	-0.131
chr1	610488	612375	-0.301
chr1	612422	617507	-0.278
chr1	617516	620310	-0.156
chr1	620549	630999	-0.053
chr1	632053	632951	-0.1
chr1	632990	633575	0.069
chr1	633599	634445	0.036
chr1	635023	636016	-0.095
chr1	636110	639575	-0.209
chr1	639632	645499	-0.074
chr1	646117	646957	-0.39
chr1	648475	649087	-0.267
chr1	649979	652039	-0.139
chr1	652356	653176	0.388
chr1	653540	656030	-0.242
chr1	656127	657615	0.125
chr1	657669	659775	-0.323
chr1	660770	661394	0.254
chr1	664067	664820	-0.325
chr1	664855	677456	-0.143
chr1	669637	670291	-0.104
chr1	674465	674983	-0.287
chr1	675317	676071	0.221
chr1	677513	679683	-0.098
chr1	680647	682462	-0.116
chr1	680861	681635	-0.239
chr1	682746	684456	-0.237
chr1	683085	684137	0
chr1	684473	686132	-0.246
chr1	687179	688038	-0.308
chr1	687434	688165	-0.426
chr1	688065	689411	-0.059
chr1	688219	688801	-0.241
chr1	689433	694166	0.048
chr1	690904	691436	-0.119
chr1	693628	694676	-0.239
chr1	694199	695083	-0.174
chr1	695125	695762	-0.276
chr1	695810	701928	-0.213
chr1	695854	697178	-0.056
chr1	701977	703427	0.031
chr1	703472	704354	-0.397
chr1	704505	706853	-0.28
chr1	706903	708083	-0.261
chr1	706926	707466	-0.059
chr1	707872	708818	-0.264
chr1	708098	711220	-0.157
chr1	711504	714195	-0.319
chr1	714728	715832	-0.354
chr1	716394	718765	-0.321
chr1	719850	734480	-0.286
chr1	734537	736505	-0.312
chr1	736550	749996	-0.276
chr1	750148	751278	-0.02
chr1	751698	753402	-0.472
chr1	753861	759687	-0.541
chr1	759716	761949	-0.214
chr1	763645	764773	-0.395
chr1	764867	766536	-0.415
chr1	766604	769992	-0.279
chr1	770558	786179	-0.294
chr1	786224	788998	-0.416
chr1	789000	793185	-0.404
chr1	793885	796765	-0.192
chr1	796880	802526	-0.335
chr1	802609	805061	-0.286
chr1	805540	806617	-0.447
chr1	806618	807244	-0.028
chr1	807702	808606	-0.176
chr1	808607	809222	-0.582
chr1	809223	810082	-0.421
chr1	810083	810612	-0.567
chr1	810613	811249	-0.498
chr1	811754	829160	-0.18
chr1	829208	839527	-0.266
chr1	840599	843539	-0.403
chr1	845829	852009	-0.423
chr1	852081	854929	-0.432
chr1	855639	856149	-0.411
chr1	856667	859057	-0.559
chr1	861188	864247	-0.561
chr1	865021	869002	-0.358
chr1	872016	872761	-0.224
chr1	873424	875130	-0.485
chr1	878527	879099	-0.773
chr1	879608	883480	-0.316
chr1	883482	886953	-0.609
chr1	887016	893113	-0.469
chr1	893232	894573	-0.287
chr1	898825	899617	-0.649
chr1	900568	901428	-0.2
chr1	902534	905974	-0.388
chr1	909785	911142	-0.366
chr1	914855	915839	-0.444
chr1	916365	919615	-0.257
chr1	920505	922519	-0.326
chr1	922820	932049	-0.317
chr1	932146	933290	-0.159
chr1	937626	941259	-0.411
chr1	941508	943214	-0.512
chr1	943292	945852	-0.278
chr1	946651	950751	-0.342
chr1	951478	953790	-0.26
chr1	957132	960289	-0.331
chr1	961330	963319	-0.338
chr1	965176	968214	-0.644
chr1	970543	974234	-0.455
chr1	974328	974898	-0.698
chr1	979746	980664	-0.516
chr1	982443	983107	-0.43
chr1	987287	990180	-0.584
chr1	991693	994060	-0.456
chr1	996244	997442	0.005
chr1	997997	999095	-0.516
chr1	1000702	1001818	-0.112
chr1	1005277	1007186	-0.333
chr1	1007857	1008727	-0.015
chr1	1009870	1010610	-0.538
chr1	1014125	1014972	-0.345
chr1	1018452	1019744	-0.563
chr1	1021620	1023234	-0.553
chr1	1024956	1026223	-0.337
chr1	1027593	1038022	-0.171
chr1	1038028	1041121	-0.33
chr1	1041295	1042210	0.039
chr1	1042465	1050207	-0.513
chr1	1052599	1055539	-0.497
chr1	1055883	1056999	-0.495
chr1	1058020	1061490	-0.67
chr1	1064548	1066061	-0.13
chr1	1067737	1068776	-0.855
chr1	1069055	1069605	-0.456
chr1	1070233	1071972	-0.11
chr1	1073577	1074833	-0.787
chr1	1077562	1078657	-0.634
chr1	1081339	1082169	-0.28
chr1	1082697	1084996	-0.296
chr1	1087116	1092242	-0.259
chr1	1094198	1095748	-0.287
chr1	1096641	1097614	-0.349
chr1	1099062	1099978	-0.417
chr1	1104972	1105873	-0.221
chr1	1107313	1108109	-0.004
chr1	1109562	1111071	-0.506
chr1	1111076	1114087	-0.251
chr1	1116767	1117381	-0.903
chr1	1119154	1132551	-0.314
chr1	1134258	1136164	-0.389
chr1	1139764	1141191	-0.431
chr1	1142344	1143840	-0.321
chr1	1144872	1146453	-0.292
chr1	1149511	1152546	-0.394
chr1	1155624	1157641	-0.245
chr1	1157773	1158980	-0.507
chr1	1159409	1160860	-0.46
chr1	1160948	1162391	-0.44
chr1	1164102	1167034	-0.26
chr1	1168931	1171742	-0.341
chr1	1171779	1172852	-0.193
chr1	1182898	1184269	-0.204
chr1	1185285	1189446	-0.336
chr1	1190516	1192401	-0.303
chr1	1192823	1203509	-0.423
chr1	1203511	1208769	-0.451
chr1	1209915	1212667	-0.231
chr1	1212714	1219457	-0.402
chr1	1219897	1220473	-0.329
chr1	1225296	1226166	-0.498
chr1	1227539	1228084	0.137
chr1	1235243	1237777	-0.438
chr1	1239056	1240977	-0.433
chr1	1241309	1242642	-0.653
chr1	1246577	1247540	-0.308
chr1	1248415	1249554	0.084
chr1	1249763	1250827	-0.467
chr1	1251243	1257893	-0.391
chr1	1261032	1262051	-0.358
chr1	1264293	1265857	-0.638
chr1	1265160	1265858	-0.874
chr1	1276219	1277235	-0.501
chr1	1287312	1288601	-0.243
chr1	1287522	1288468	-0.615
chr1	1292904	1293404	-0.798
chr1	1294368	1295017	-0.41
chr1	1295902	1296977	-0.58
chr1	1297319	1300411	-0.486
chr1	1301047	1302181	-0.471
chr1	1301654	1303563	-0.484
chr1	1302555	1303292	-0.382
chr1	1303592	1304265	-0.462
chr1	1303594	1304302	-0.128
chr1	1307937	1308577	-0.355
chr1	1308829	1309422	-0.772
chr1	1311250	1313372	-0.428
chr1	1313512	1314123	-0.225
chr1	1316948	1318300	-0.587
chr1	1318392	1319591	-0.103
chr1	1319949	1320652	-0.537
chr1	1319974	1320603	-0.533
chr1	1321342	1322256	-0.465
chr1	1321562	1322250	-0.11
chr1	1323240	1323770	-0.491
chr1	1324229	1325475	-0.02
chr1	1324236	1325485	-0.28
chr1	1325532	1326717	-0.088
chr1	1325536	1328981	-0.396
chr1	1326845	1328830	-0.231
chr1	1328993	1330124	0.053
chr1	1330420	1331557	-0.302
chr1	1330765	1331282	-0.484
chr1	1332222	1333908	-0.111
chr1	1335458	1341806	-0.338
chr1	1336266	1337452	-0.423
chr1	1338590	1339453	-0.255
chr1	1339455	1340501	-0.232
chr1	1340574	1341110	-0.561
chr1	1344484	1348729	-0.35
chr1	1348027	1350178	-0.379
chr1	1348741	1351970	-0.337
chr1	1350293	1351803	-0.469
chr1	1352523	1354381	-0.218
chr1	1352636	1353397	-0.631
chr1	1357966	1359538	-0.325
chr1	1359950	1360667	-0.154
chr1	1364028	1365760	-0.28
chr1	1369905	1370430	-0.385
chr1	1376976	1378698	-0.601
chr1	1379504	1380337	-0.462
chr1	1382295	1383038	-0.188
chr1	1383504	1385381	-0.292
chr1	1383884	1385134	-0.228
chr1	1385387	1386243	-0.762
chr1	1386613	1387588	-0.116
chr1	1388501	1389601	-0.274
chr1	1390962	1392530	-0.266
chr1	1393297	1394494	-0.695
chr1	1393795	1394298	-0.128
chr1	1396362	1397133	-0.397
chr1	1397444	1398164	-0.587
chr1	1398498	1399611	-0.537
chr1	1398659	1399573	-0.095
chr1	1399618	1400414	-0.726
chr1	1400988	1401618	-0.523
chr1	1401807	1402575	-0.166
chr1	1401939	1402753	-0.589
chr1	1402822	1403777	-0.823
chr1	1405136	1406658	-0.331
chr1	1408570	1410397	-0.561
chr1	1410957	1411627	-0.358
chr1	1411699	1412254	-0.299
chr1	1412078	1412695	-0.211
chr1	1413350	1413915	-0.303
chr1	1414520	1415259	-0.471
chr1	1417876	1418490	-0.337
chr1	1418069	1418860	-0.628
chr1	1418608	1419451	-0.408
chr1	1419762	1420339	-0.073
chr1	1422268	1422841	-0.561
chr1	1422269	1422838	-0.381
chr1	1423166	1425110	-0.192
chr1	1426588	1427612	-0.331
chr1	1426591	1429611	-0.26
chr1	1428369	1429586	-0.046
chr1	1430661	1431174	-0.458
chr1	1432533	1433202	-0.039
chr1	1436331	1437515	-0.055
chr1	1439522	1440551	-0.24
chr1	1440363	1441289	-0.101
chr1	1440554	1441404	-0.097
chr1	1442194	1444779	-0.411
chr1	1445484	1446844	-0.187
chr1	1447982	1452619	-0.411
chr1	1452934	1453866	-0.635
chr1	1454771	1455378	-0.521
chr1	1455673	1456668	-0.493
chr1	1456875	1458080	-0.442
chr1	1458969	1461959	-0.277
chr1	1462038	1464399	-0.036
chr1	1464422	1468317	-0.232
chr1	1468384	1469581	-0.603
chr1	1471857	1474655	-0.637
chr1	1476860	1477742	-0.353
chr1	1479171	1485279	-0.355
chr1	1485698	1496202	-0.332
chr1	1496231	1506627	-0.363
chr1	1506658	1507198	-0.027
chr1	1508536	1509536	-0.279
chr1	1510293	1511421	-0.175
chr1	1511533	1513503	-0.333
chr1	1513544	1519394	-0.387
chr1	1519395	1519964	0.338
chr1	1519965	1521244	-0.501
chr1	1521683	1522977	-0.278
chr1	1523363	1524546	-0.438
chr1	1524779	1532835	-0.316
chr1	1532886	1534561	-0.283
chr1	1535987	1540800	-0.381
chr1	1542023	1543402	-0.211
chr1	1543655	1550592	-0.317
chr1	1552141	1556223	-0.447
chr1	1557047	1558595	-0.567
chr1	1560039	1560645	-0.492
chr1	1571570	1573756	-0.438
chr1	1574329	1575372	-0.134
chr1	1576267	1577731	-0.565
chr1	1577821	1580337	-0.296
chr1	1580583	1589316	-0.316
chr1	1590786	1591759	-0.382
chr1	1591807	1597236	-0.338
chr1	1597259	1598310	-0.267
chr1	1598888	1600256	-0.435
chr1	1601016	1606359	-0.324
chr1	1606893	1607682	-0.351
chr1	1608167	1609051	0.016
chr1	1609072	1613213	-0.381
chr1	1613449	1615119	-0.187
chr1	1615154	1621426	-0.275
chr1	1622155	1623671	-0.539
chr1	1626173	1628826	-0.259
chr1	1629988	1630563	-0.242
chr1	1630574	1631150	-0.473
chr1	1634637	1636035	-0.513
chr1	1636048	1636835	-0.066
chr1	1637338	1638593	-0.233
chr1	1639876	1640653	-0.97
chr1	1641031	1643549	-0.427
chr1	1644232	1651511	-0.361
chr1	1651545	1654699	-0.235
chr1	1654955	1655669	-0.222
chr1	1656490	1660336	-0.372
chr1	1660720	1662850	-0.353
chr1	1663019	1663623	-0.378
chr1	1663845	1669311	-0.227
chr1	1669733	1670565	-0.445
chr1	1671018	1674991	-0.511
chr1	1675394	1676904	-0.393
chr1	1678703	1681459	-0.399
chr1	1682725	1684695	-0.273
chr1	1684805	1685599	-0.328
chr1	1686269	1687054	-0.415
chr1	1687488	1688554	-0.373
chr1	1688808	1690260	-0.599
chr1	1690564	1691566	-0.169
chr1	1691818	1696753	-0.502
chr1	1697162	1702183	-0.171
chr1	1702585	1704648	-0.276
chr1	1706094	1709141	-0.427
chr1	1710634	1713572	-0.515
chr1	1714499	1735617	-0.332
chr1	1735626	1739263	-0.335
chr1	1739271	1741796	-0.188
chr1	1742710	1743869	-0.431
chr1	1744702	1745511	-0.175
chr1	1746573	1749986	-0.408
chr1	1750132	1751175	-0.178
chr1	1751211	1769534	-0.302
chr1	1769581	1771114	-0.307
chr1	1771208	1775638	-0.243
chr1	1775837	1777013	-0.304
chr1	1777073	1792911	-0.326
chr1	1792917	1808738	-0.27
chr1	1808942	1809813	-0.287
chr1	1809923	1811478	-0.205
chr1	1811920	1816613	-0.285
chr1	1817203	1821307	-0.184
chr1	1823331	1824069	-0.259
chr1	1824496	1833884	-0.424
chr1	1834281	1835540	-0.306
chr1	1835908	1837335	-0.207
chr1	1837410	1840052	-0.651
chr1	1841159	1844125	-0.277
chr1	1844802	1848402	-0.389
chr1	1848734	1850009	-0.552
chr1	1851380	1853069	-0.561
chr1	1853093	1855217	-0.419
chr1	1855946	1857904	-0.355
chr1	1859229	1860638	-0.495
chr1	1861149	1863184	-0.255
chr1	1863209	1863716	-0.221
chr1	1863733	1866380	-0.342
chr1	1866985	1874542	-0.396
chr1	1875578	1879524	-0.319
chr1	1879870	1886735	-0.292
chr1	1887116	1889138	-0.46
chr1	1890006	1892915	-0.478
chr1	1893022	1896456	-0.337
chr1	1898036	1900437	-0.489
chr1	1900936	1912583	-0.385
chr1	1914450	1917489	-0.342
chr1	1917987	1920157	-0.162
chr1	1920342	1921839	-0.345
chr1	1921943	1924391	-0.41
chr1	1924394	1925013	-0.319
chr1	1925017	1930039	-0.346
chr1	1930362	1933744	-0.357
chr1	1934390	1935183	-0.122
chr1	1935475	1943587	-0.332
chr1	1944000	1950400	-0.387
chr1	1951303	1953084	-0.351
chr1	1953284	1953875	-0.323
chr1	1954246	1955677	-0.23
chr1	1955732	1956484	-0.07
chr1	1957318	1959505	-0.212
chr1	1959836	1960798	-0.603
chr1	1961542	1963334	-0.195
chr1	1963402	1974832	-0.316
chr1	1974857	1976145	0.013
chr1	1976563	1981444	0.032
chr1	1983143	1991733	0.084
chr1	1992254	2001804	-0.06
chr1	2002701	2003766	0.127
chr1	2003974	2005223	0.089
chr1	2006471	2012928	0.009
chr1	2013291	2019309	-0.082
chr1	2019421	2024960	-0.044
chr1	2026195	2026890	0.035
chr1	2027315	2039656	-0.12
chr1	2039702	2053168	-0.01
chr1	2055815	2058832	-0.055
chr1	2058878	2064391	-0.053
chr1	2065493	2070144	-0.035
chr1	2070225	2075388	-0.093
chr1	2075815	2100793	-0.077
chr1	2101803	2102872	-0.225
chr1	2103672	2104255	-0.213
chr1	2104582	2106851	-0.005
chr1	2107301	2108745	0.127
chr1	2108801	2112509	-0.17
chr1	2113097	2113712	-0.248
chr1	2114016	2116626	0.114
chr1	2116672	2117893	-0.031
chr1	2118152	2118944	-0.062
chr1	2118946	2120314	-0.162
chr1	2121748	2124810	0.053
chr1	2127188	2135917	0.026
chr1	2137574	2138953	0.038
chr1	2138954	2139802	-0.023
chr1	2139803	2141588	0.069
chr1	2144351	2146291	-0.081
chr1	2146932	2153324	-0.234
chr1	2153825	2156238	-0.097
chr1	2156267	2158017	-0.199
chr1	2161217	2165119	-0.344
chr1	2165214	2169550	-0.31
chr1	2169728	2182341	-0.36
chr1	2182632	2188884	-0.411
chr1	2189173	2191417	-0.35
chr1	2191987	2194860	-0.165
chr1	2194887	2199469	-0.3
chr1	2199635	2201266	-0.464
chr1	2201936	2202770	-0.378
chr1	2203175	2204262	0.105
chr1	2204333	2205532	-0.491
chr1	2205534	2206045	-0.871
chr1	2206242	2212058	-0.385
chr1	2213098	2217142	-0.353
chr1	2217146	2218530	-0.458
chr1	2218938	2220952	-0.377
chr1	2221091	2223036	-0.118
chr1	2223077	2232475	-0.364
chr1	2232494	2235318	-0.292
chr1	2236067	2236737	-0.6
chr1	2239004	2240704	-0.165
chr1	2242088	2243662	-0.433
chr1	2244822	2245740	-0.233
chr1	2248164	2248996	-0.391
chr1	2255424	2256389	-0.123
chr1	2256513	2259263	-0.333
chr1	2259280	2260907	-0.268
chr1	2261347	2262818	-0.377
chr1	2263439	2264339	-0.113
chr1	2264500	2266793	-0.247
chr1	2268881	2271037	-0.142
chr1	2271198	2274143	-0.351
chr1	2275871	2276415	-0.444
chr1	2276853	2279007	-0.254
chr1	2280239	2281896	-0.309
chr1	2281965	2282566	-0.03
chr1	2283039	2285945	-0.335
chr1	2286990	2288467	-0.149
chr1	2288847	2289836	-0.292
chr1	2289940	2291291	-0.338
chr1	2291482	2292486	-0.378
chr1	2292487	2293379	-0.006
chr1	2293607	2294882	-0.202
chr1	2295287	2297699	-0.184
chr1	2297915	2300795	-0.391
chr1	2301201	2304460	-0.272
chr1	2304846	2312795	-0.323
chr1	2313693	2316405	-0.276
chr1	2316725	2322295	-0.393
chr1	2323705	2332735	-0.366
chr1	2332831	2334893	-0.394
chr1	2335182	2337456	-0.398
chr1	2337871	2339451	-0.38
chr1	2340468	2343560	-0.448
chr1	2344963	2346264	-0.408
chr1	2346291	2347478	0.058
chr1	2347890	2350151	-0.309
chr1	2350415	2351046	-0.246
chr1	2351450	2358256	-0.304
chr1	2359123	2359643	-0.156
chr1	2360386	2363999	-0.374
chr1	2364192	2365411	-0.425
chr1	2365692	2370736	-0.415
chr1	2370747	2372789	-0.134
chr1	2372850	2374830	-0.319
chr1	2375900	2377045	-0.489
chr1	2378219	2380174	-0.334
chr1	2380602	2381706	-0.414
chr1	2384735	2385275	-0.309
chr1	2385384	2386843	-0.385
chr1	2388117	2389022	-0.679
chr1	2389660	2397035	-0.504
chr1	2399579	2401974	-0.488
chr1	2402452	2403405	-0.452
chr1	2404712	2405520	-0.46
chr1	2405957	2407813	-0.493
chr1	2408724	2409327	-0.292
chr1	2409822	2410867	-0.665
chr1	2411666	2415250	-0.321
chr1	2415452	2422476	-0.453
chr1	2422562	2424866	-0.33
chr1	2424948	2426086	-0.391
chr1	2427433	2428011	-0.603
chr1	2428301	2429325	-0.412
chr1	2431205	2431809	-0.533
chr1	2434281	2434934	-0.296
chr1	2438334	2439243	-0.497
chr1	2440373	2441687	-0.413
chr1	2442534	2443849	-0.36
chr1	2444347	2445595	-0.531
chr1	2446443	2448648	-0.387
chr1	2448658	2449243	-0.093
chr1	2450136	2451049	-0.242
chr1	2451983	2457149	-0.311
chr1	2458233	2459836	-0.428
chr1	2459847	2460819	-0.351
chr1	2462423	2463936	-0.401
chr1	2464245	2466930	-0.531
chr1	2467351	2472047	-0.543
chr1	2472770	2474963	-0.482
chr1	2476108	2477370	-0.563
chr1	2478871	2481240	-0.293
chr1	2481243	2483860	-0.319
chr1	2485444	2486661	-0.452
chr1	2487011	2488549	0.016
chr1	2488838	2491509	-0.16
chr1	2491643	2498064	-0.347
chr1	2499915	2511975	-0.353
chr1	2512384	2514663	-0.316
chr1	2514798	2516011	-0.424
chr1	2516104	2516808	-0.422
chr1	2519055	2519562	-0.515
chr1	2519727	2521863	-0.581
chr1	2524469	2527009	-0.281
chr1	2528284	2531509	-0.423
chr1	2531663	2535471	-0.361
chr1	2535789	2536960	-0.705
chr1	2539316	2540732	-0.419
chr1	2540963	2542561	-0.272
chr1	2543708	2559679	-0.321
chr1	2561901	2568383	-0.52
chr1	2568518	2569166	-0.265
chr1	2569641	2570235	-0.408
chr1	2571230	2572447	-0.274
chr1	2575279	2576095	-0.355
chr1	2576171	2576702	-0.363
chr1	2576775	2591947	-0.386
chr1	2592078	2594575	-0.488
chr1	2594789	2598463	-0.431
chr1	2598490	2599193	-0.237
chr1	2599405	2608245	-0.469
chr1	2608698	2634210	-0.394
chr1	2684228	2686925	-0.344
chr1	2686947	2700313	-0.363
chr1	2700775	2702501	-0.394
chr1	2702557	2705903	-0.401
chr1	2707730	2714660	-0.256
chr1	2715559	2716763	-0.504
chr1	2717619	2718442	-0.596
chr1	2718870	2720646	-0.435
chr1	2721077	2721878	-0.072
chr1	2722268	2725325	-0.336
chr1	2726835	2728233	-0.225
chr1	2728290	2729831	-0.421
chr1	2730134	2731531	-0.404
chr1	2732552	2737099	-0.376
chr1	2737681	2738705	-0.387
chr1	2738870	2747234	-0.47
chr1	2747648	2752046	-0.462
chr1	2752484	2764664	-0.314
chr1	2764724	2770848	-0.406
chr1	2771032	2772330	-0.48
chr1	2772349	2779812	-0.432
chr1	2780970	2784814	-0.355
chr1	2785408	2792458	-0.308
chr1	2792796	2795528	-0.515
chr1	2795681	2796676	-0.284
chr1	2796921	2799653	-0.352
chr1	2800261	2803376	-0.381
chr1	2803833	2804900	-0.666
chr1	2805395	2806207	-0.203
chr1	2806591	2808467	-0.201
chr1	2808644	2821600	-0.489
chr1	2822944	2824140	-0.637
chr1	2824170	2827890	-0.43
chr1	2828394	2837129	-0.476
chr1	2837144	2838091	-0.378
chr1	2838104	2838788	-0.422
chr1	2838809	2843316	-0.444
chr1	2843466	2846751	-0.396
chr1	2847603	2852448	-0.341
chr1	2852472	2862203	-0.457
chr1	2862281	2862863	-0.3
chr1	2862968	2864226	-0.331
chr1	2864535	2866171	-0.325
chr1	2866660	2874392	-0.344
chr1	2874418	2891274	-0.395
chr1	2891280	2893517	-0.448
chr1	2894077	2897408	-0.312
chr1	2897571	2911695	-0.352
chr1	2911850	2913102	-0.186
chr1	2913184	2919826	-0.261
chr1	2919897	2927130	-0.404
chr1	2928311	2929131	-0.564
chr1	2929259	2933253	-0.438
chr1	2933425	2941527	-0.405
chr1	2941614	2955703	-0.52
chr1	2955985	2959084	-0.357
chr1	2959177	2962849	-0.357
chr1	2963653	2965816	0.016
chr1	2965817	2968270	-0.53
chr1	2968456	2969265	-0.719
chr1	2969266	2971772	-0.47
chr1	2971882	2979284	-0.442
chr1	2980811	2984080	-0.259
chr1	2987907	2989367	-0.304
chr1	2990559	2999542	-0.343
chr1	2999999	3003744	-0.371
chr1	3003803	3004909	-0.327
chr1	3005520	3010363	-0.408
chr1	3010607	3022709	-0.387
chr1	3022742	3025647	-0.333
chr1	3025682	3027819	-0.293
chr1	3028244	3032267	-0.66
chr1	3032512	3037938	-0.352
chr1	3038372	3042219	-0.296
chr1	3042894	3049375	-0.461
chr1	3049487	3051384	-0.391
chr1	3051945	3052600	0.078
chr1	3052676	3067179	-0.443
chr1	3067531	3071916	-0.393
chr1	3072386	3073084	-0.036
chr1	3073631	3074956	-0.128
chr1	3075012	3077458	-0.402
chr1	3077511	3078197	-0.193
chr1	3078583	3084084	-0.431
chr1	3085062	3086314	-0.623
chr1	3087450	3111177	-0.463
chr1	3111242	3113873	-0.342
chr1	3114772	3121708	-0.349
chr1	3121727	3128899	-0.282
chr1	3129168	3138784	-0.354
chr1	3138786	3144120	-0.288
chr1	3144126	3150891	-0.312
chr1	3151007	3154199	-0.403
chr1	3154216	3157512	-0.272
chr1	3158034	3164052	-0.407
chr1	3164375	3166775	-0.414
chr1	3166789	3169438	-0.458
chr1	3169954	3182899	-0.403
chr1	3183223	3193072	-0.422
chr1	3193118	3195633	-0.548
chr1	3196430	3200604	-0.49
chr1	3200718	3203654	-0.323
chr1	3204235	3216540	-0.453
chr1	3216623	3230173	-0.474
chr1	3230448	3231581	-0.234
chr1	3231615	3232714	-0.433
chr1	3232870	3234598	-0.516
chr1	3234599	3235289	-0.139
chr1	3235355	3240031	-0.427
chr1	3240133	3240949	-0.243
chr1	3241022	3244238	-0.265
chr1	3244253	3245540	-0.19
chr1	3245578	3248918	-0.269
chr1	3249089	3265987	-0.451
chr1	3266011	3268081	-0.164
chr1	3268972	3270383	-0.18
chr1	3270452	3275278	-0.308
chr1	3275371	3295323	-0.401
chr1	3296322	3310162	-0.407
chr1	3311171	3321463	-0.431
chr1	3322298	3328361	-0.468
chr1	3329867	3341537	-0.438
chr1	3342451	3344735	-0.468
chr1	3344816	3346965	-0.524
chr1	3347886	3350025	-0.545
chr1	3350757	3356323	-0.324
chr1	3356776	3359207	-0.368
chr1	3359219	3362051	-0.411
chr1	3362248	3363341	-0.158
chr1	3363550	3366633	-0.102
chr1	3366887	3368027	-0.255
chr1	3369696	3370575	-0.27
chr1	3371688	3378647	-0.481
chr1	3379019	3379746	-0.57
chr1	3380002	3382013	-0.665
chr1	3382028	3384092	-0.439
chr1	3385605	3388082	-0.614
chr1	3388131	3389397	-0.389
chr1	3389460	3391735	-0.671
chr1	3391889	3393130	-0.297
chr1	3394256	3395915	-0.443
chr1	3396545	3398580	-0.565
chr1	3399318	3400311	-0.421
chr1	3400714	3402511	-0.212
chr1	3402516	3403689	-0.274
chr1	3403743	3407279	-0.245
chr1	3408376	3410540	-0.451
chr1	3411212	3412502	-0.417
chr1	3415178	3416159	-0.189
chr1	3416414	3417184	-0.575
chr1	3418900	3420445	-0.499
chr1	3421084	3421950	-0.221
chr1	3422016	3425559	-0.512
chr1	3427200	3429784	-0.475
chr1	3430584	3431140	-0.048
chr1	3431527	3435373	-0.493
chr1	3436269	3437359	-0.289
chr1	3437625	3439128	-0.377
chr1	3439719	3447160	-0.43
chr1	3448485	3458156	-0.361
chr1	3458397	3459853	-0.32
chr1	3460544	3462775	-0.169
chr1	3463756	3464960	-0.606
chr1	3465658	3470713	-0.353
chr1	3470791	3471696	-0.371
chr1	3472150	3480749	-0.364
chr1	3480752	3484363	-0.277
chr1	3484376	3491142	-0.359
chr1	3491392	3496551	-0.4
chr1	3497257	3500289	-0.521
chr1	3500330	3504486	-0.609
chr1	3505103	3508276	-0.225
chr1	3510100	3512952	-0.193
chr1	3513506	3514605	-0.316
chr1	3517242	3517886	-0.528
chr1	3517887	3519075	-0.259
chr1	3519153	3520173	-0.175
chr1	3520652	3524476	-0.383
chr1	3524657	3527338	-0.398
chr1	3528394	3529286	-0.64
chr1	3529340	3533381	-0.444
chr1	3533718	3534499	-0.36
chr1	3534598	3541111	-0.422
chr1	3542159	3556710	-0.405
chr1	3557362	3560206	-0.296
chr1	3560917	3561899	-0.571
chr1	3562447	3566250	-0.225
chr1	3569624	3577971	-0.353
chr1	3578595	3585492	-0.371
chr1	3585845	3591648	-0.418
chr1	3591782	3597918	-0.507
chr1	3598164	3600703	-0.396
chr1	3601161	3606144	-0.353
chr1	3606165	3607017	0.144
chr1	3607360	3610403	-0.405
chr1	3610909	3612260	-0.471
chr1	3612323	3613413	-0.491
chr1	3613753	3618978	-0.376
chr1	3619456	3622667	-0.455
chr1	3623102	3624141	-0.211
chr1	3624418	3626755	-0.548
chr1	3627018	3633800	-0.522
chr1	3633921	3634690	0.166
chr1	3635240	3641937	-0.378
chr1	3642894	3644175	-0.214
chr1	3644467	3646843	-0.356
chr1	3646869	3647754	-0.124
chr1	3647758	3649357	-0.174
chr1	3650233	3651565	-0.176
chr1	3652001	3657050	-0.369
chr1	3657538	3658076	-0.534
chr1	3658077	3659624	-0.23
chr1	3659911	3660941	-0.168
chr1	3661021	3663494	-0.328
chr1	3664205	3671402	-0.354
chr1	3671415	3673952	-0.304
chr1	3674796	3678560	-0.277
chr1	3678595	3679958	-0.313
chr1	3679982	3688637	-0.278
chr1	3689769	3690754	-0.35
chr1	3691507	3711035	-0.364
chr1	3711078	3712467	-0.438
chr1	3713065	3714733	-0.559
chr1	3714776	3723657	-0.406
chr1	3724191	3729179	-0.182
chr1	3730042	3761990	-0.352
chr1	3762001	3773160	-0.351
chr1	3774441	3808811	-0.394
chr1	3808895	3816606	-0.247
chr1	3818088	3836619	-0.422
chr1	3837191	3845268	-0.353
chr1	3995269	3996644	-0.4
chr1	3997637	3999768	-0.485
chr1	3999769	4000770	-0.387
chr1	4000942	4002803	-0.239
chr1	4002915	4026592	-0.386
chr1	4026666	4028864	-0.311
chr1	4029254	4029767	-0.273
chr1	4029768	4030393	-0.332
chr1	4030394	4032878	-0.212
chr1	4033194	4037025	-0.36
chr1	4037103	4045621	-0.409
chr1	4046218	4059837	-0.36
chr1	4059900	4076547	-0.364
chr1	4077322	4159820	-0.384
chr1	4160513	4165108	-0.269
chr1	4165111	4168067	-0.473
chr1	4168087	4181562	-0.338
chr1	4182074	4188999	-0.397
chr1	4189165	4199852	-0.422
chr1	4199953	4210899	-0.434
chr1	4211344	4214951	-0.456
chr1	4215470	4221668	-0.386
chr1	4221723	4222774	-0.579
chr1	4222781	4234731	-0.384
chr1	4234788	4235395	-0.406
chr1	4235463	4238714	-0.501
chr1	4239192	4239960	-0.407
chr1	4239961	4242162	-0.349
chr1	4242229	4271242	-0.296
chr1	4271349	4286071	-0.407
chr1	4286109	4290945	-0.184
chr1	4290977	4304411	-0.299
chr1	4304490	4313886	-0.309
chr1	4313919	4334189	-0.372
chr1	4334211	4338669	-0.407
chr1	4338724	4363246	-0.376
chr1	4363343	4382854	-0.402
chr1	4382904	4386051	-0.414
chr1	4386096	4403496	-0.427
chr1	4403679	4425148	-0.346
chr1	4425180	4474755	-0.389
chr1	4474946	4480336	-0.378
chr1	4480444	4519881	-0.391
chr1	4519959	4520807	-0.395
chr1	4521256	4521884	-0.171
chr1	4521908	4527599	-0.45
chr1	4527771	4529119	-0.437
chr1	4529212	4529943	-0.549
chr1	4529944	4530760	-0.24
chr1	4530761	4532478	-0.457
chr1	4533275	4536576	-0.256
chr1	4536609	4568621	-0.395
chr1	4568919	4595752	-0.385
chr1	4596115	4600201	-0.345
chr1	4600202	4601034	-0.036
chr1	4601035	4604078	-0.416
chr1	4604079	4604741	-0.187
chr1	4604742	4605813	-0.497
chr1	4606674	4608338	-0.398
chr1	4608419	4636089	-0.399
chr1	4636176	4641334	-0.307
chr1	4641390	4643866	-0.386
chr1	4643958	4678347	-0.306
chr1	4679303	4693021	-0.374
chr1	4693057	4700527	-0.346
chr1	4700572	4704422	-0.29
chr1	4704451	4711822	-0.467
chr1	4711976	4713016	-0.37
chr1	4713028	4714138	-0.336
chr1	4716242	4717102	-0.327
chr1	4717127	4717756	-0.277
chr1	4718070	4765463	-0.368
chr1	4765491	4769253	-0.438
chr1	4769339	4771443	-0.5
chr1	4772428	4800442	-0.396
chr1	4800868	4813516	-0.473
chr1	4813548	4840383	-0.385
chr1	4840422	4843270	-0.364
chr1	4843829	4852378	-0.376
chr1	4852841	4869015	-0.363
chr1	4869161	4872103	-0.381
chr1	4872104	4872788	0.124
chr1	4872860	4874129	-0.148
chr1	4874131	4895004	-0.332
chr1	4895123	4904329	-0.396
chr1	4904707	4920822	-0.379
chr1	4920953	4950725	-0.34
chr1	4950833	4953428	-0.331
chr1	4953433	4964048	-0.397
chr1	4964064	4992137	-0.304
chr1	4992357	5020018	-0.369
chr1	5020119	5029232	-0.337
chr1	5029304	5056552	-0.354
chr1	5056624	5084766	-0.364
chr1	5085065	5086981	-0.285
chr1	5087030	5122555	-0.317
chr1	5122706	5129556	-0.279
chr1	5129598	5134050	-0.361
chr1	5134131	5135445	-0.222
chr1	5136103	5148783	-0.465
chr1	5149095	5169367	-0.289
chr1	5169533	5185115	-0.34
chr1	5185158	5188070	-0.3
chr1	5188076	5189429	-0.099
chr1	5189759	5190520	-0.262
chr1	5190620	5197091	-0.281
chr1	5197227	5214895	-0.311
chr1	5214986	5228750	-0.404
chr1	5229247	5230190	-0.642
chr1	5230489	5231718	-0.466
chr1	5231808	5232669	-0.362
chr1	5232741	5241711	-0.396
chr1	5241797	5272403	-0.286
chr1	5272852	5274390	-0.281
chr1	5274912	5287683	-0.343
chr1	5287727	5294955	-0.33
chr1	5294984	5306651	-0.428
chr1	5306724	5313586	-0.312
chr1	5313844	5374420	-0.382
chr1	5374422	5379501	-0.274
chr1	5380269	5435360	-0.343
chr1	5463341	5464071	-0.59
chr1	5464792	5473711	-0.406
chr1	5473821	5480664	-0.517
chr1	5481162	5482549	-0.439
chr1	5482550	5484250	-0.408
chr1	5484321	5496552	-0.302
chr1	5496592	5516946	-0.404
chr1	5517156	5525048	-0.498
chr1	5525050	5537903	-0.389
chr1	5538144	5538851	-0.319
chr1	5539229	5541427	-0.345
chr1	5542108	5552419	-0.503
chr1	5552474	5578677	-0.346
chr1	5579259	5585001	-0.281
chr1	5585092	5587051	-0.454
chr1	5587289	5620557	-0.321
chr1	5620668	5665325	-0.337
chr1	5665339	5666442	-0.539
chr1	5666476	5669863	-0.32
chr1	5669881	5677682	-0.358
chr1	5677757	5693228	-0.335
chr1	5693288	5695322	-0.593
chr1	5695403	5696973	-0.276
chr1	5697275	5698131	-0.195
chr1	5698132	5698672	-0.518
chr1	5698673	5699531	-0.318
chr1	5699532	5700050	-0.658
chr1	5700051	5712836	-0.388
chr1	5712924	5714275	-0.069
chr1	5714868	5720772	-0.341
chr1	5720954	5725806	-0.354
chr1	5725904	5728069	-0.287
chr1	5728877	5729708	-0.138
chr1	5729783	5739120	-0.202
chr1	5739250	5741923	-0.402
chr1	5742070	5747746	-0.517
chr1	5748358	5749273	-0.407
chr1	5749274	5750079	-0.505
chr1	5750080	5751639	-0.401
chr1	5751793	5763388	-0.309
chr1	5763450	5772155	-0.319
chr1	5772290	5782469	-0.434
chr1	5782546	5786837	-0.466
chr1	5787569	5788535	-0.318
chr1	5788593	5792619	-0.4
chr1	5792778	5804149	-0.36
chr1	5804366	5833256	-0.419
chr1	5833435	5837222	-0.474
chr1	5837239	5844081	-0.371
chr1	5844421	5850303	-0.336
chr1	5850347	5871452	-0.417
chr1	5871482	5878535	-0.308
chr1	5878595	5885879	-0.387
chr1	5885961	5887651	-0.41
chr1	5887729	5888755	-0.312
chr1	5888832	5892325	-0.513
chr1	5892403	5894457	-0.276
chr1	5894720	5918302	-0.38
chr1	5918589	5947803	-0.45
chr1	5947970	6012599	-0.351
chr1	6012730	6024896	-0.391
chr1	6025008	6037006	-0.348
chr1	6037263	6038539	-0.556
chr1	6038958	6039717	-0.262
chr1	6040509	6051647	-0.334
chr1	6053281	6065243	-0.411
chr1	6066615	6067231	-0.665
chr1	6067941	6070822	-0.338
chr1	6071462	6085909	-0.335
chr1	6086204	6096021	-0.391
chr1	6096025	6102888	-0.373
chr1	6102948	6121078	-0.42
chr1	6121133	6125817	-0.208
chr1	6126266	6131793	-0.386
chr1	6131914	6132943	-0.323
chr1	6133065	6138959	-0.39
chr1	6139199	6142253	-0.3
chr1	6142254	6143066	-0.006
chr1	6143105	6148113	-0.445
chr1	6149082	6151543	-0.56
chr1	6151684	6155276	-0.502
chr1	6156107	6159601	-0.439
chr1	6159611	6161741	-0.297
chr1	6162315	6166381	-0.333
chr1	6166975	6170365	-0.669
chr1	6170411	6179730	-0.337
chr1	6180227	6183677	-0.44
chr1	6184768	6187581	-0.458
chr1	6188093	6201029	-0.378
chr1	6201683	6208803	-0.352
chr1	6209100	6214801	-0.381
chr1	6215178	6222855	-0.463
chr1	6222961	6225272	-0.527
chr1	6225275	6230659	-0.444
chr1	6230999	6239221	-0.449
chr1	6240888	6259335	-0.336
chr1	6259574	6262004	-0.486
chr1	6262207	6262806	-0.045
chr1	6262807	6263589	-0.735
chr1	6263639	6265563	-0.401
chr1	6267477	6268563	-0.36
chr1	6269538	6295664	-0.329
chr1	6296995	6301814	-0.28
chr1	6302951	6304728	-0.317
chr1	6306373	6309207	-0.508
chr1	6310712	6313927	-0.21
chr1	6314137	6315232	-0.296
chr1	6315618	6316315	0.167
chr1	6316400	6317071	-0.237
chr1	6317793	6320123	-0.33
chr1	6321759	6338121	-0.393
chr1	6338363	6340224	-0.423
chr1	6340243	6345211	-0.405
chr1	6345277	6359185	-0.33
chr1	6359679	6363318	-0.451
chr1	6363669	6364759	-0.401
chr1	6366294	6374448	-0.405
chr1	6374452	6383780	-0.353
chr1	6383940	6392347	-0.295
chr1	6392397	6393763	-0.235
chr1	6393815	6401287	-0.371
chr1	6401359	6414801	-0.429
chr1	6414834	6430525	-0.331
chr1	6430699	6448144	-0.291
chr1	6448817	6452946	-0.331
chr1	6453989	6455940	-0.522
chr1	6456279	6464489	-0.34
chr1	6464525	6468825	-0.277
chr1	6468885	6470086	-0.449
chr1	6470090	6472537	-0.093
chr1	6472538	6473693	-0.484
chr1	6473694	6475817	-0.276
chr1	6476361	6478535	-0.482
chr1	6480918	6484428	-0.259
chr1	6485516	6486919	-0.258
chr1	6487626	6488667	-0.283
chr1	6489170	6496539	-0.347
chr1	6496693	6500134	-0.418
chr1	6501373	6501883	-0.36
chr1	6502379	6503938	-0.422
chr1	6503940	6505790	-0.592
chr1	6506290	6507233	-0.745
chr1	6509154	6511490	-0.34
chr1	6512259	6514073	-0.173
chr1	6516468	6518420	-0.418
chr1	6518976	6520235	-0.296
chr1	6520723	6521512	-0.594
chr1	6521864	6523788	-0.461
chr1	6524045	6525691	-0.468
chr1	6528364	6530456	-0.487
chr1	6531771	6533349	-0.605
chr1	6535446	6541335	-0.282
chr1	6541889	6544373	-0.428
chr1	6546247	6550138	-0.339
chr1	6551031	6555345	-0.352
chr1	6555474	6556948	-0.37
chr1	6558059	6564401	-0.379
chr1	6564438	6566220	-0.401
chr1	6566458	6571005	-0.45
chr1	6571051	6576877	-0.298
chr1	6577033	6578092	-0.615
chr1	6578580	6589653	-0.413
chr1	6590339	6596532	-0.236
chr1	6596767	6600314	-0.177
chr1	6600712	6611020	-0.274
chr1	6612530	6614084	0.011
chr1	6614588	6619030	-0.263
chr1	6619038	6633703	-0.365
chr1	6633880	6634485	0.149
chr1	6634558	6640071	-0.48
chr1	6640404	6642211	-0.432
chr1	6643020	6647389	-0.295
chr1	6647452	6653390	-0.43
chr1	6653497	6659734	-0.294
chr1	6660113	6661839	-0.567
chr1	6663332	6669078	-0.301
chr1	6669326	6673193	-0.332
chr1	6675695	6685142	-0.369
chr1	6685726	6694304	-0.414
chr1	6695026	6699913	-0.356
chr1	6699981	6701441	-0.426
chr1	6701473	6719958	-0.313
chr1	6719973	6755169	-0.295
chr1	6755246	6758720	-0.103
chr1	6759055	6761566	-0.378
chr1	6762149	6766113	-0.238
chr1	6766118	6774250	-0.3
chr1	6777697	6782055	-0.351
chr1	6783229	6785540	-0.223
chr1	6785817	6788995	-0.188
chr1	6789135	6790025	-0.167
chr1	6790043	6791282	-0.224
chr1	6791391	6793671	-0.384
chr1	6793929	6795969	-0.267
chr1	6795997	6802385	-0.363
chr1	6802832	6806923	-0.357
chr1	6806996	6811495	-0.217
chr1	6811900	6829100	-0.333
chr1	6829419	6830024	-0.018
chr1	6830458	6844348	-0.388
chr1	6846244	6848627	-0.373
chr1	6848628	6849543	-0.222
chr1	6850119	6857643	-0.275
chr1	6859451	6864425	-0.367
chr1	6864795	6870463	-0.404
chr1	6870563	6872324	-0.406
chr1	6872396	6872935	-0.12
chr1	6873474	6878700	-0.306
chr1	6879365	6881178	-0.341
chr1	6881179	6881898	-0.106
chr1	6882180	6884765	-0.254
chr1	6884866	6890200	-0.295
chr1	6890217	6894269	-0.14
chr1	6894333	6896838	-0.379
chr1	6896839	6897905	0.073
chr1	6899022	6909678	-0.281
chr1	6910079	6939858	-0.308
chr1	6940163	6964822	-0.278
chr1	6964824	7012700	-0.331
chr1	7012716	7022031	-0.403
chr1	7023843	7038702	-0.318
chr1	7038759	7050857	-0.367
chr1	7050980	7053912	-0.352
chr1	7053939	7099009	-0.31
chr1	7099244	7112127	-0.38
chr1	7112140	7121721	-0.388
chr1	7122279	7143961	-0.349
chr1	7144257	7183220	-0.407
chr1	7183309	7186480	-0.375
chr1	7186481	7187007	-0.131
chr1	7187008	7188713	-0.54
chr1	7189104	7195984	-0.136
chr1	7195985	7196739	-0.564
chr1	7196740	7197360	-0.342
chr1	7197502	7199056	-0.206
chr1	7199451	7259760	-0.333
chr1	7259834	7260706	-0.222
chr1	7260707	7261901	-0.678
chr1	7261902	7262470	-0.371
chr1	7262683	7264546	-0.293
chr1	7264593	7283204	-0.293
chr1	7283234	7285968	-0.268
chr1	7286353	7287683	-0.214
chr1	7287684	7289532	-0.59
chr1	7289652	7290466	-0.693
chr1	7290511	7302827	-0.302
chr1	7303214	7304948	-0.406
chr1	7305470	7315347	-0.397
chr1	7315393	7325490	-0.35
chr1	7325493	7330263	-0.274
chr1	7330373	7335435	-0.27
chr1	7335480	7336003	-0.045
chr1	7336516	7344249	-0.295
chr1	7344280	7364942	-0.38
chr1	7365057	7369907	-0.295
chr1	7369963	7370765	-0.222
chr1	7370847	7371576	-0.237
chr1	7371832	7381414	-0.351
chr1	7381607	7388473	-0.321
chr1	7388898	7392157	-0.218
chr1	7392735	7393519	-0.123
chr1	7394124	7395196	-0.416
chr1	7395249	7398019	-0.404
chr1	7398080	7400570	-0.404
chr1	7400695	7441209	-0.358
chr1	7441233	7452588	-0.39
chr1	7452599	7457973	-0.21
chr1	7458314	7471820	-0.329
chr1	7472100	7473121	-0.38
chr1	7473148	7507471	-0.367
chr1	7507528	7515758	-0.392
chr1	7515811	7517073	-0.519
chr1	7517202	7562928	-0.463
chr1	7562995	7580512	-0.373
chr1	7580534	7608793	-0.379
chr1	7609340	7610814	-0.107
chr1	7610822	7618351	-0.348
chr1	7618422	7647247	-0.469
chr1	7647251	7654029	-0.385
chr1	7654185	7657884	-0.418
chr1	7658010	7661138	-0.274
chr1	7661517	7662184	-0.494
chr1	7662219	7673838	-0.438
chr1	7673841	7707442	-0.404
chr1	7707480	7724109	-0.377
chr1	7724192	7725240	-0.213
chr1	7725272	7726164	-0.56
chr1	7726288	7729508	-0.468
chr1	7730090	7732196	-0.262
chr1	7732421	7732936	-0.323
chr1	7733113	7734653	-0.46
chr1	7734742	7739701	-0.426
chr1	7741025	7763945	-0.388
chr1	7765751	7790974	-0.262
chr1	7791018	7802179	-0.292
chr1	7802460	7831259	-0.262
chr1	7831687	7838955	-0.328
chr1	7839765	7843559	-0.374
chr1	7844934	7849214	-0.366
chr1	7849216	7854872	-0.352
chr1	7854963	7866853	-0.281
chr1	7866900	7874730	-0.3
chr1	7874987	7885116	-0.262
chr1	7885274	7902567	-0.328
chr1	7902730	7907094	-0.305
chr1	7907442	7915726	-0.387
chr1	7915783	7919302	-0.396
chr1	7919336	7940172	-0.385
chr1	7940510	7941496	-0.215
chr1	7941497	7942254	0.053
chr1	7942903	7944461	-0.17
chr1	7944519	7945924	-0.407
chr1	7946031	7956643	-0.248
chr1	7957046	7963156	-0.288
chr1	7963846	7973964	-0.362
chr1	7974346	7977827	-0.226
chr1	7978071	7981729	-0.214
chr1	7981740	7984342	-0.409
chr1	7984712	7985232	-0.174
chr1	7985319	7998106	-0.306
chr1	7998123	8004284	-0.34
chr1	8004663	8006217	-0.601
chr1	8006365	8008533	-0.207
chr1	8008590	8010329	-0.611
chr1	8011096	8012569	-0.216
chr1	8013402	8014315	-0.338
chr1	8014318	8021342	-0.212
chr1	8022028	8028173	-0.239
chr1	8028394	8033780	-0.168
chr1	8034177	8055279	-0.36
chr1	8056055	8058275	-0.421
chr1	8059073	8059999	-0.112
chr1	8060056	8061340	-0.162
chr1	8062506	8064880	-0.268
chr1	8064983	8065693	-0.433
chr1	8065744	8067526	-0.374
chr1	8067815	8085808	-0.337
chr1	8086680	8093492	-0.283
chr1	8093847	8096125	-0.307
chr1	8096173	8097744	-0.115
chr1	8097775	8120892	-0.255
chr1	8121194	8122820	-0.412
chr1	8122834	8129514	-0.244
chr1	8129541	8143165	-0.268
chr1	8143443	8145190	-0.404
chr1	8146036	8149289	-0.198
chr1	8149359	8150361	-0.3
chr1	8150885	8158531	-0.365
chr1	8159338	8159865	-0.045
chr1	8160298	8161198	-0.214
chr1	8161341	8162245	-0.256
chr1	8162254	8177398	-0.285
chr1	8177809	8188477	-0.398
chr1	8188891	8192870	-0.171
chr1	8193389	8202598	-0.278
chr1	8202650	8227004	-0.342
chr1	8227020	8232686	-0.277
chr1	8233051	8238041	-0.039
chr1	8238406	8240594	-0.335
chr1	8240997	8247243	-0.255
chr1	8248958	8250435	-0.222
chr1	8251275	8253501	-0.363
chr1	8253835	8256113	-0.231
chr1	8256120	8257177	-0.242
chr1	8257606	8259718	-0.425
chr1	8259902	8265234	-0.375
chr1	8265448	8266375	-0.211
chr1	8266860	8267472	-0.397
chr1	8267473	8268925	-0.238
chr1	8269563	8271506	-0.36
chr1	8271594	8275228	-0.379
chr1	8275269	8276943	-0.184
chr1	8277687	8279582	-0.307
chr1	8279627	8282913	-0.415
chr1	8282998	8289027	-0.356
chr1	8289337	8293315	-0.227
chr1	8293910	8295257	-0.449
chr1	8295384	8295905	-0.559
chr1	8296458	8302738	-0.212
chr1	8303544	8307198	-0.146
chr1	8307249	8313586	-0.331
chr1	8313625	8315061	-0.247
chr1	8315539	8322128	-0.343
chr1	8322393	8324415	-0.142
chr1	8324443	8332669	-0.335
chr1	8332989	8339669	-0.418
chr1	8339730	8350125	-0.271
chr1	8350264	8358734	-0.234
chr1	8359156	8377670	-0.321
chr1	8378372	8382208	-0.49
chr1	8382222	8384564	-0.256
chr1	8384591	8390434	-0.381
chr1	8391751	8392596	-0.424
chr1	8392597	8393398	-0.021
chr1	8393471	8395032	-0.286
chr1	8395033	8396319	-0.483
chr1	8396320	8397145	-0.48
chr1	8397233	8408038	-0.359
chr1	8408128	8410644	-0.462
chr1	8410738	8418633	-0.307
chr1	8418896	8419713	-0.431
chr1	8421287	8428749	-0.3
chr1	8428928	8429490	-0.25
chr1	8430029	8434590	-0.563
chr1	8435060	8435705	-1.249
chr1	8435995	8437097	-0.319
chr1	8437410	8443763	-0.561
chr1	8443970	8445795	-0.419
chr1	8446700	8448653	-0.343
chr1	8448715	8452063	-0.49
chr1	8452121	8455038	-0.671
chr1	8455209	8459271	-0.464
chr1	8461538	8463494	-0.864
chr1	8464105	8464610	-0.154
chr1	8464756	8475252	-0.243
chr1	8475275	8476630	-0.435
chr1	8476729	8483433	-0.281
chr1	8484300	8505863	-0.287
chr1	8505891	8528225	-0.336
chr1	8528284	8539319	-0.213
chr1	8539415	8544456	-0.268
chr1	8544484	8548472	-0.255
chr1	8548491	8558428	-0.224
chr1	8559157	8559691	-0.043
chr1	8559874	8560865	-0.441
chr1	8563187	8572225	-0.253
chr1	8572264	8600133	-0.222
chr1	8600169	8605692	-0.171
chr1	8606399	8607837	-0.156
chr1	8607879	8619207	-0.243
chr1	8619356	8630143	-0.237
chr1	8630447	8633396	-0.198
chr1	8633414	8635243	-0.204
chr1	8635638	8643748	-0.266
chr1	8644041	8655511	-0.346
chr1	8655626	8667288	-0.23
chr1	8667796	8675988	-0.259
chr1	8676122	8696226	-0.255
chr1	8697001	8702127	-0.235
chr1	8702144	8706162	-0.355
chr1	8706169	8710819	-0.29
chr1	8711003	8720090	-0.391
chr1	8720179	8729015	-0.331
chr1	8729084	8731870	-0.362
chr1	8731871	8732590	-0.189
chr1	8733481	8748950	-0.263
chr1	8749112	8750962	-0.222
chr1	8750975	8755020	-0.131
chr1	8755122	8759271	-0.152
chr1	8759355	8762799	-0.179
chr1	8763601	8771217	-0.219
chr1	8771393	8772389	-0.049
chr1	8772959	8775577	-0.084
chr1	8775581	8793021	-0.201
chr1	8793024	8799909	-0.17
chr1	8799957	8827895	-0.256
chr1	8828065	8839094	-0.277
chr1	8839098	8849340	-0.335
chr1	8849388	8850733	-0.077
chr1	8850951	8862132	-0.224
chr1	8862166	8863409	-0.061
chr1	8863421	8877273	-0.29
chr1	8878163	8883307	-0.265
chr1	8883406	8889212	-0.285
chr1	8890092	8891692	-0.399
chr1	8891693	8892581	-0.421
chr1	8892822	8893326	-0.204
chr1	8893972	8909105	-0.324
chr1	8909403	8911126	-0.444
chr1	8911149	8913473	-0.323
chr1	8913494	8937692	-0.302
chr1	8939614	8940152	-0.223
chr1	8940153	8941557	-0.276
chr1	8941618	8942670	-0.268
chr1	8943484	8947368	-0.241
chr1	8947397	8947969	-0.437
chr1	8948054	8948577	-0.372
chr1	8948578	8951306	-0.119
chr1	8951307	8951858	-0.529
chr1	8951859	8954726	-0.232
chr1	8954768	8961263	-0.394
chr1	8961317	8964068	-0.315
chr1	8964235	8965056	-0.354
chr1	8965083	8966495	-0.313
chr1	8966496	8967082	0.176
chr1	8967099	8972373	-0.372
chr1	8972375	8988147	-0.218
chr1	8988155	8991908	-0.317
chr1	8992238	8996737	-0.269
chr1	8996760	9035196	-0.327
chr1	9035246	9038023	-0.372
chr1	9038687	9039248	-0.084
chr1	9039257	9055437	-0.274
chr1	9055536	9074856	-0.373
chr1	9074922	9090591	-0.385
chr1	9090615	9099335	-0.348
chr1	9100272	9104257	-0.401
chr1	9104374	9113026	-0.352
chr1	9114225	9114863	-0.522
chr1	9115237	9116326	-0.187
chr1	9116454	9123766	-0.326
chr1	9124511	9125340	-0.447
chr1	9125341	9127210	-0.243
chr1	9127211	9127796	-0.812
chr1	9128116	9131655	-0.165
chr1	9132322	9137327	-0.261
chr1	9137841	9158662	-0.264
chr1	9158786	9161221	-0.531
chr1	9161291	9176169	-0.332
chr1	9177040	9183217	-0.311
chr1	9183897	9188337	-0.287
chr1	9189723	9218484	-0.352
chr1	9219015	9220041	-0.168
chr1	9220114	9242184	-0.363
chr1	9243481	9246766	-0.36
chr1	9247087	9255098	-0.296
chr1	9255519	9258847	-0.405
chr1	9259040	9268639	-0.364
chr1	9269261	9294376	-0.312
chr1	9295639	9308164	-0.388
chr1	9308796	9309316	-0.105
chr1	9309317	9310560	-0.601
chr1	9310948	9315229	-0.251
chr1	9315317	9324312	-0.495
chr1	9324423	9334028	-0.313
chr1	9334062	9336769	-0.337
chr1	9336829	9339262	-0.179
chr1	9339348	9340397	-0.466
chr1	9340511	9342579	-0.374
chr1	9342621	9348804	-0.293
chr1	9348954	9351571	-0.141
chr1	9351953	9352455	-0.373
chr1	9353728	9356650	-0.344
chr1	9356698	9360910	-0.316
chr1	9360962	9366181	-0.496
chr1	9366269	9372443	-0.326
chr1	9373260	9376118	-0.235
chr1	9376261	9378401	-0.213
chr1	9378484	9381043	-0.367
chr1	9381086	9389217	-0.456
chr1	9389294	9390814	-0.281
chr1	9390877	9391509	-0.427
chr1	9391889	9392984	-0.465
chr1	9393067	9412714	-0.356
chr1	9413242	9427463	-0.386
chr1	9427533	9428917	-0.477
chr1	9428948	9431366	-0.368
chr1	9431415	9436768	-0.237
chr1	9437008	9439961	-0.425
chr1	9440142	9473334	-0.335
chr1	9473410	9474575	-0.225
chr1	9474583	9482143	-0.295
chr1	9482221	9484603	-0.369
chr1	9484659	9491336	-0.382
chr1	9491346	9496913	-0.229
chr1	9496976	9509412	-0.261
chr1	9509415	9547804	-0.308
chr1	9547833	9555084	-0.297
chr1	9555558	9562097	-0.334
chr1	9562797	9563473	-0.222
chr1	9563817	9571922	-0.292
chr1	9572137	9583523	-0.266
chr1	9583959	9592325	-0.47
chr1	9592327	9594962	-0.112
chr1	9596155	9597735	-0.423
chr1	9597780	9599249	-0.247
chr1	9600160	9603054	-0.319
chr1	9603211	9605861	-0.27
chr1	9606387	9609806	-0.445
chr1	9610967	9624652	-0.262
chr1	9624822	9626914	-0.266
chr1	9626935	9640908	-0.219
chr1	9640948	9645676	-0.335
chr1	9646055	9648616	-0.219
chr1	9649447	9652698	-0.345
chr1	9652739	9661133	-0.365
chr1	9661139	9662787	-0.109
chr1	9662801	9670690	-0.382
chr1	9670695	9673960	-0.378
chr1	9673977	9677133	-0.427
chr1	9677542	9682097	-0.419
chr1	9682246	9683489	-0.168
chr1	9683505	9687180	-0.252
chr1	9687345	9689076	-0.405
chr1	9689898	9698174	-0.327
chr1	9698595	9702272	-0.341
chr1	9702359	9703498	-0.483
chr1	9703567	9704575	-0.402
chr1	9706001	9707175	-0.67
chr1	9707571	9710639	-0.306
chr1	9710742	9711736	-0.515
chr1	9713019	9713541	-0.314
chr1	9714251	9717871	-0.433
chr1	9718105	9720991	-0.299
chr1	9720992	9721934	-0.147
chr1	9722475	9723618	-0.223
chr1	9723649	9735430	-0.336
chr1	9735726	9747601	-0.319
chr1	9748076	9749276	-0.265
chr1	9749982	9752892	-0.352
chr1	9753465	9756087	-0.337
chr1	9756790	9768776	-0.223
chr1	9768790	9772537	-0.389
chr1	9772590	9773706	-0.358
chr1	9774383	9775819	-0.465
chr1	9776030	9780311	-0.371
chr1	9782023	9785613	-0.531
chr1	9786471	9789244	-0.376
chr1	9790351	9828420	-0.37
chr1	9828913	9832219	-0.282
chr1	9832222	9858159	-0.286
chr1	9858238	9860486	-0.326
chr1	9861003	9863873	-0.301
chr1	9864244	9870461	-0.291
chr1	9870878	9877465	-0.377
chr1	9877491	9883386	-0.28
chr1	9884478	9889048	-0.362
chr1	9889556	9890472	-0.524
chr1	9890527	9910618	-0.3
chr1	9910705	9916604	-0.253
chr1	9916644	9947967	-0.31
chr1	9948143	9958041	-0.291
chr1	9958226	9969936	-0.354
chr1	9970673	9975767	-0.274
chr1	9976356	9977093	-0.42
chr1	9977634	9979647	-0.234
chr1	9979714	9983782	-0.343
chr1	9984581	9990642	-0.22
chr1	9991099	9993311	-0.229
chr1	9993368	10000013	-0.285
chr1	10000017	10003345	-0.292
chr1	10003421	10009131	-0.366
chr1	10009826	10022383	-0.291
chr1	10022447	10025206	-0.261
chr1	10025440	10026673	-0.448
chr1	10026716	10028239	-0.133
chr1	10028395	10033698	-0.219
chr1	10033737	10040114	-0.288
chr1	10040573	10043168	-0.164
chr1	10043250	10047706	-0.351
chr1	10047722	10049368	-0.255
chr1	10049659	10056063	-0.302
chr1	10056149	10057145	-0.176
chr1	10058407	10061864	-0.392
chr1	10061901	10073408	-0.246
chr1	10073441	10088364	-0.215
chr1	10089549	10091923	-0.398
chr1	10093212	10095458	-0.452
chr1	10096155	10126061	-0.31
chr1	10126462	10139513	-0.282
chr1	10139514	10140125	0.242
chr1	10140126	10145931	-0.265
chr1	10146730	10148144	-0.428
chr1	10148145	10149235	0.028
chr1	10149695	10157098	-0.241
chr1	10157363	10157945	-0.334
chr1	10158225	10159658	-0.085
chr1	10160370	10163465	-0.2
chr1	10163630	10180269	-0.375
chr1	10181474	10194626	-0.314
chr1	10194635	10212297	-0.257
chr1	10212372	10223111	-0.282
chr1	10224051	10227294	-0.35
chr1	10227571	10233524	-0.333
chr1	10233573	10235563	-0.304
chr1	10235744	10237333	-0.128
chr1	10237738	10241696	-0.305
chr1	10242036	10247622	-0.36
chr1	10248825	10249746	-0.258
chr1	10251101	10259948	-0.321
chr1	10260252	10262244	-0.218
chr1	10262962	10265420	-0.386
chr1	10265511	10270285	-0.27
chr1	10271251	10272684	-0.228
chr1	10273041	10275168	-0.282
chr1	10275265	10299536	-0.278
chr1	10299967	10316748	-0.22
chr1	10316917	10317886	-0.112
chr1	10317893	10323328	-0.254
chr1	10323337	10324853	-0.217
chr1	10325631	10334795	-0.227
chr1	10334842	10336853	-0.332
chr1	10337144	10350185	-0.308
chr1	10350433	10360296	-0.154
chr1	10360696	10373943	-0.263
chr1	10373965	10380781	-0.268
chr1	10381003	10410612	-0.316
chr1	10410998	10417967	-0.225
chr1	10418114	10419809	-0.153
chr1	10420312	10420978	-0.349
chr1	10420979	10424884	-0.31
chr1	10424888	10426299	-0.37
chr1	10426335	10427198	-0.571
chr1	10427427	10430630	-0.245
chr1	10430992	10432685	-0.157
chr1	10432991	10442135	-0.267
chr1	10442475	10447200	-0.322
chr1	10447204	10453557	-0.285
chr1	10453620	10458665	-0.261
chr1	10459592	10461925	-0.348
chr1	10462108	10465156	-0.402
chr1	10465595	10470873	-0.208
chr1	10470956	10482502	-0.348
chr1	10483765	10486508	-0.336
chr1	10486760	10490403	-0.38
chr1	10490877	10514747	-0.292
chr1	10514749	10515618	-0.383
chr1	10515698	10530922	-0.34
chr1	10530936	10535159	-0.153
chr1	10535253	10547771	-0.243
chr1	10548784	10556978	-0.243
chr1	10557411	10557993	-0.287
chr1	10558315	10560339	-0.288
chr1	10560803	10563004	-0.328
chr1	10563437	10565738	-0.394
chr1	10565754	10590488	-0.234
chr1	10590514	10599057	-0.364
chr1	10599082	10603612	-0.297
chr1	10603692	10608915	-0.226
chr1	10609051	10612363	-0.308
chr1	10612364	10612911	-0.013
chr1	10612912	10614756	-0.241
chr1	10615009	10616100	-0.032
chr1	10616101	10616752	-0.591
chr1	10616753	10622795	-0.189
chr1	10622796	10623303	-0.675
chr1	10623558	10633149	-0.198
chr1	10633230	10637215	-0.216
chr1	10637680	10641726	-0.251
chr1	10642195	10643664	-0.164
chr1	10643908	10645641	-0.191
chr1	10645915	10653619	-0.207
chr1	10653686	10665050	-0.269
chr1	10665112	10669970	-0.273
chr1	10670440	10677080	-0.36
chr1	10677177	10677757	-0.454
chr1	10677809	10679972	-0.52
chr1	10680379	10683315	-0.228
chr1	10683703	10684385	0.13
chr1	10684386	10687253	-0.433
chr1	10687287	10690188	-0.183
chr1	10690452	10694610	-0.44
chr1	10695012	10696476	-0.298
chr1	10697303	10698352	-0.01
chr1	10699678	10702217	-0.392
chr1	10702854	10704243	-0.429
chr1	10705271	10706903	-0.272
chr1	10707211	10709283	-0.35
chr1	10712010	10713341	-0.413
chr1	10714015	10715604	-0.273
chr1	10716099	10716781	-0.72
chr1	10718221	10719667	-0.46
chr1	10721091	10722246	-0.7
chr1	10722812	10723474	-0.66
chr1	10725549	10727471	-0.283
chr1	10728463	10729729	-0.116
chr1	10729876	10732239	-0.328
chr1	10732549	10735396	-0.45
chr1	10735398	10738313	-0.389
chr1	10738840	10740298	-0.106
chr1	10740421	10741875	-0.303
chr1	10741878	10744215	-0.271
chr1	10744298	10750662	-0.645
chr1	10751160	10752065	-0.754
chr1	10752254	10753424	-0.381
chr1	10755958	10757997	-0.857
chr1	10758080	10759020	-0.797
chr1	10759417	10761526	-0.303
chr1	10761601	10764474	-0.541
chr1	10765275	10766796	-0.687
chr1	10767064	10768641	-0.543
chr1	10770320	10772388	-0.45
chr1	10773060	10777328	-0.38
chr1	10777905	10785408	-0.362
chr1	10785415	10788030	-0.37
chr1	10788104	10788665	-0.262
chr1	10789362	10792177	-0.249
chr1	10792411	10795435	-0.265
chr1	10795440	10801835	-0.437
chr1	10802125	10803682	-0.283
chr1	10804053	10810616	-0.449
chr1	10811162	10811666	-0.539
chr1	10812134	10814915	-0.341
chr1	10815642	10818208	-0.307
chr1	10818268	10819425	-0.27
chr1	10819506	10833458	-0.434
chr1	10833497	10839218	-0.356
chr1	10839597	10848839	-0.326
chr1	10848857	10852349	-0.357
chr1	10857032	10884563	-0.324
chr1	10885145	10886632	-0.354
chr1	10886913	10895215	-0.355
chr1	10896222	10897264	-0.246
chr1	10897327	10903279	-0.427
chr1	10903748	10904911	-0.192
chr1	10904943	10913768	-0.387
chr1	10913858	10916117	-0.461
chr1	10917021	10922544	-0.404
chr1	10922879	10926289	-0.35
chr1	10927730	10943671	-0.297
chr1	10943963	10948236	-0.26
chr1	10949198	10952026	-0.347
chr1	10952032	10954662	-0.373
chr1	10954671	10960470	-0.279
chr1	10960481	10961256	-0.251
chr1	10961282	10961972	-0.083
chr1	10962035	10965090	-0.404
chr1	10965785	10975236	-0.433
chr1	10975431	10987583	-0.275
chr1	10988027	10992623	-0.228
chr1	10992710	11003114	-0.376
chr1	11003157	11011777	-0.318
chr1	11011846	11043115	-0.333
chr1	11043135	11049855	-0.328
chr1	11049870	11054129	-0.306
chr1	11054514	11057140	-0.186
chr1	11057727	11064120	-0.241
chr1	11064144	11066620	-0.313
chr1	11066627	11068421	-0.265
chr1	11069233	11070749	-0.467
chr1	11070970	11072032	-0.528
chr1	11073215	11075828	-0.184
chr1	11076011	11089451	-0.229
chr1	11089499	11095151	-0.326
chr1	11095342	11096354	-0.245
chr1	11096743	11105682	-0.503
chr1	11105771	11107487	-0.299
chr1	11107620	11108593	-0.284
chr1	11109398	11114945	-0.309
chr1	11115998	11119623	-0.325
chr1	11120398	11126519	-0.272
chr1	11128574	11133372	-0.332
chr1	11133413	11143365	-0.322
chr1	11143706	11159656	-0.284
chr1	11160042	11173632	-0.286
chr1	11173662	11178426	-0.355
chr1	11178486	11179803	-0.372
chr1	11181022	11183274	-0.537
chr1	11183494	11201067	-0.344
chr1	11202309	11214130	-0.279
chr1	11214654	11220091	-0.266
chr1	11220409	11224391	-0.363
chr1	11224456	11243800	-0.294
chr1	11245007	11246132	-0.152
chr1	11246133	11246855	-0.599
chr1	11246856	11252660	-0.271
chr1	11252725	11262682	-0.27
chr1	11262817	11281547	-0.31
chr1	11282848	11284104	-0.176
chr1	11284135	11286589	0.012
chr1	11287363	11309282	-0.384
chr1	11310363	11322367	-0.336
chr1	11322919	11324803	-0.176
chr1	11325369	11329275	-0.251
chr1	11329377	11330294	-0.221
chr1	11330492	11332965	-0.28
chr1	11333400	11358336	-0.353
chr1	11358661	11361112	-0.437
chr1	11361240	11362752	-0.275
chr1	11363567	11364536	-0.372
chr1	11364796	11365707	-0.397
chr1	11366294	11369679	-0.231
chr1	11369776	11379987	-0.387
chr1	11380102	11398099	-0.318
chr1	11398211	11400016	-0.391
chr1	11400042	11407716	-0.379
chr1	11407769	11430305	-0.284
chr1	11430708	11437592	-0.473
chr1	11437595	11507411	-0.325
chr1	11507441	11530166	-0.371
chr1	11530383	11533426	-0.525
chr1	11533437	11535945	-0.132
chr1	11536023	11537303	-0.444
chr1	11537355	11538447	-0.36
chr1	11540385	11561503	-0.341
chr1	11562167	11582628	-0.32
chr1	11583024	11596679	-0.307
chr1	11596685	11599561	-0.516
chr1	11599695	11612715	-0.275
chr1	11612740	11639212	-0.372
chr1	11639489	11648634	-0.291
chr1	11648648	11656076	-0.345
chr1	11656114	11668839	-0.319
chr1	11669149	11682893	-0.415
chr1	11683190	11684593	-0.311
chr1	11685324	11686861	-0.475
chr1	11687635	11688449	-0.436
chr1	11688549	11695832	-0.335
chr1	11695845	11705964	-0.271
chr1	11706071	11706965	-0.253
chr1	11707292	11709005	-0.203
chr1	11709375	11710551	-0.007
chr1	11710814	11713605	-0.472
chr1	11715545	11718631	-0.363
chr1	11718725	11722379	-0.32
chr1	11722485	11724058	-0.3
chr1	11724980	11729885	-0.306
chr1	11730327	11734362	-0.437
chr1	11734385	11735559	-0.333
chr1	11735770	11736467	-0.453
chr1	11736632	11737583	-0.341
chr1	11737629	11740279	-0.324
chr1	11741597	11750962	-0.331
chr1	11752621	11755665	-0.492
chr1	11755683	11756607	-0.187
chr1	11756791	11757576	-0.531
chr1	11757778	11759660	-0.228
chr1	11759673	11760311	0.075
chr1	11760336	11766462	-0.433
chr1	11766746	11794118	-0.344
chr1	11794169	11796158	-0.408
chr1	11796716	11822218	-0.324
chr1	11822283	11823122	-0.152
chr1	11823251	11824563	-0.154
chr1	11824564	11825142	-0.194
chr1	11825143	11827879	-0.456
chr1	11827880	11829557	-0.214
chr1	11829721	11830745	-0.228
chr1	11831305	11832361	-0.464
chr1	11832362	11833080	-0.201
chr1	11833591	11840004	-0.321
chr1	11840046	11844492	-0.385
chr1	11845306	11853796	-0.33
chr1	11853890	11857516	-0.372
chr1	11857547	11865202	-0.328
chr1	11866497	11890784	-0.316
chr1	11891008	11898363	-0.377
[truncated: 466,439+ more rows]
