# Supplementary material for: Integrative Analysis Reveals the Transcriptional Collaboration between EZH2 and E2F1 in the Regulation of Cancer-Related Gene Expression
Source: Oxford University Press journal article supplement (doi:10.1158/1541-7786.mcr-15-0313), 2015-12-10
Supplement: 15417786mcr150313-sup-152701_1_supp_3230739_nxxxgz.docx [file 15417786mcr150313-sup-152701_1_supp_3230739_nxxxgz.docx]

**Supplementary Information**

**Figure legends for Supplementary Figures**

**Supplementary Figure 1.** Identification of EZH2 solo and ensemble peaks based on the Cumulative Density Function (CDF) of H3K27me3 ChIP-seq intensity. The cumulative distribution of H3K27me3 ChIP-seq intensity at the top 1000 EZH2 peaks in abl cells is plotted. The red dashed line refers to the intensity value at which the slope of the curve is minimal. The value is chosen as the threshold for determining EZH2 solo and ensemble peaks.

**Supplementary Figure 2.** Correlation of E2F1 with EZH2 and EZH2-activated signature genes. (A) Red areas indicate Pearson correlation coefficients of EZH2-activated signature genes with E2F1. Black vertical bars represent each individual signature gene being ranked in descending order of correlation with E2F1. The correlations were computed based on the gene expression dataset in GSE21034. (B) Correlation between the expression levels of EZH2 and E2F1 in tumor expression profiles retrieved from GSE21034.

**Supplementary Figure 3.** Venn diagram showing overlap between EZH2- and E2F1-repressed genes in abl cells. Differential genes were determined by calculating the expression changes between knockdown and control conditions (fold change<1.5). The hyper-geometric *p*-value = 1.2E-3.

**Supplementary Figure 4.** Overexpression of E2F1 in prostate cancer cells leads to upregulation of EZH2 and EZH2-activated signature genes. LNCaP cells were transiently transfected with either empty vector (vector) or two HA-tagged E2F1 expression plasmids (HA-E2F1#1 and #2). Cells were cultured for 48 hrs before being harvested for Western blot analysis with indicated antibodies (A) or RT-PCR (B). Arrow head, the endogenous E2F1.

**Supplementary Figure 5.** Change in E2F1 protein level upon EZH2 knockdown in prostate cancer cells. Abl cells were transiently transfected with control siRNA (siCtrl) or two specific siRNAs oligonucleotides to E2F1 (siE2F1#1 and #2). Cells were collected 48 hrs after transfection for Western blot analysis with indicated antibodies.

**Supplementary Figure 6.** Mutual activation of downstream target genes by EZH2 and E2F1 in biological systems other than prostate cancer cells. (A) Box plots showing upregulation of mouse homologs of EZH2-activated signature genes upon E2F1 overexpression in mouse fibroblast cells. The dataset was retrieved from GSE498. (B) Box plots showing downregulation of E2F1-activated signature genes upon EZH2 knockdown in primary erythroid progenitor cells. The dataset was retrieved from GSE59089. Both *p*-values were computed using Kolmogorov-Smirnov test.

**Supplementary Figure 7.** Venn diagram showing overlap between genes bound by EZH2 solo peaks or E2F1 peaks. Genes were pooled when containing at least one EZH2 solo peak (bound by EZH2 solo) or E2F1 peak (bound by E2F1) within the promoter regions of the genes [+/- 2 kb of transcription start site (TSS)]. Numbers, number of genes that are bound by E2F1 peaks only, EZH2 solo peaks only, or co-bound by both.

**Supplementary Figure 8.** Expression changes of known EZH2-repressed genes upon EZH2 inhibitor treatment or EZH2 knockdown. (A) Expression changes of *CDKN1A*, *IRF4*, and *PRDM1* upon EZH2 inhibitor GSK126 treatment in DLBCL cells. (B) Expression changes of *CDKN1A*, *IRF4*, and *PRDM1* upon EZH2 knockdown in prostate cancer and DLBCL cell lines.

**Supplementary Figure 9.** The efficacy of EZH2 inhibitor in prostate cancer cells. Cells were kept with either DMSO or various concentrations of GSK126, and collected on indicated days. The androgen-dependent growth of LNCaP (top panel) or hormone-independent proliferation of abl (bottom panel) was measured by direct cell counting.

**Supplementary Figure 10.** Expression changes of selected target genes that are co-activated by both EZH2 and E2F1 upon EZH2 inhibitor treatment in LNCaP (A) and abl (B) cells. Prostate cancer cells were treated with either DMSO or various doses of GSK126 as indicated for 3 days before real-time RT-PCR was performed.

**Supplementary Figure 1.** Identification of EZH2 solo and ensemble peaks based on the Cumulative Density Function (CDF) of H3K27me3 ChIP-seq intensity.

**Supplementary Figure 2.** Correlation of E2F1 with EZH2 and EZH2-activated signature genes.

**Supplementary Figure 3.** Venn diagram showing overlap between EZH2- and E2F1-repressed genes in abl cells.


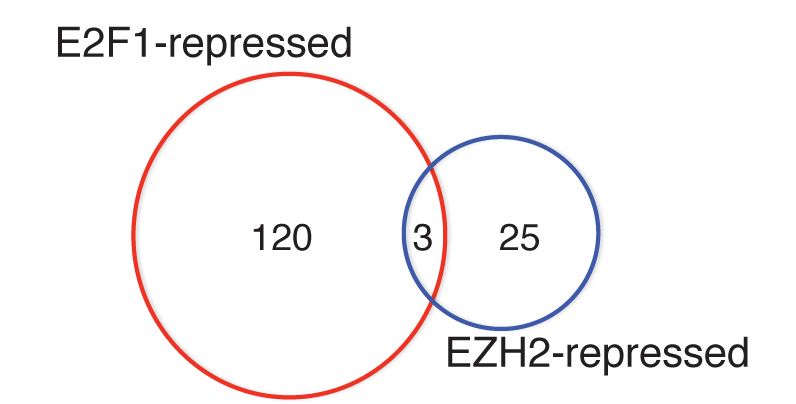


**Supplementary Figure 4.** Overexpression of E2F1 in prostate cancer cells leads to upregulation of EZH2 and EZH2-activated signature genes.

**Supplementary Figure 5.** Change in E2F1 protein level upon EZH2 knockdown in prostate cancer cells.

**Supplementary Figure 6.** Mutual activation of downstream target genes by EZH2 and E2F1 in biological systems other than prostate cancer cells.

**Supplementary Figure 7.** Venn diagram showing overlap between genes bound by EZH2 solo peaks or E2F1 peaks.


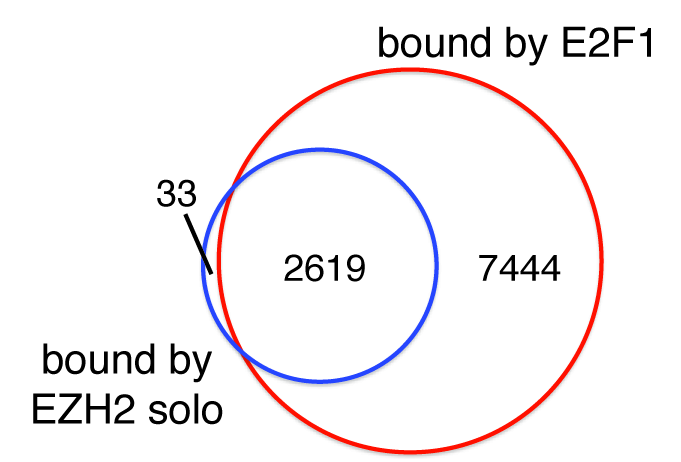


**Supplementary Figure 8.** Expression changes of known EZH2-repressed genes upon EZH2 inhibitor treatment or EZH2 knockdown.


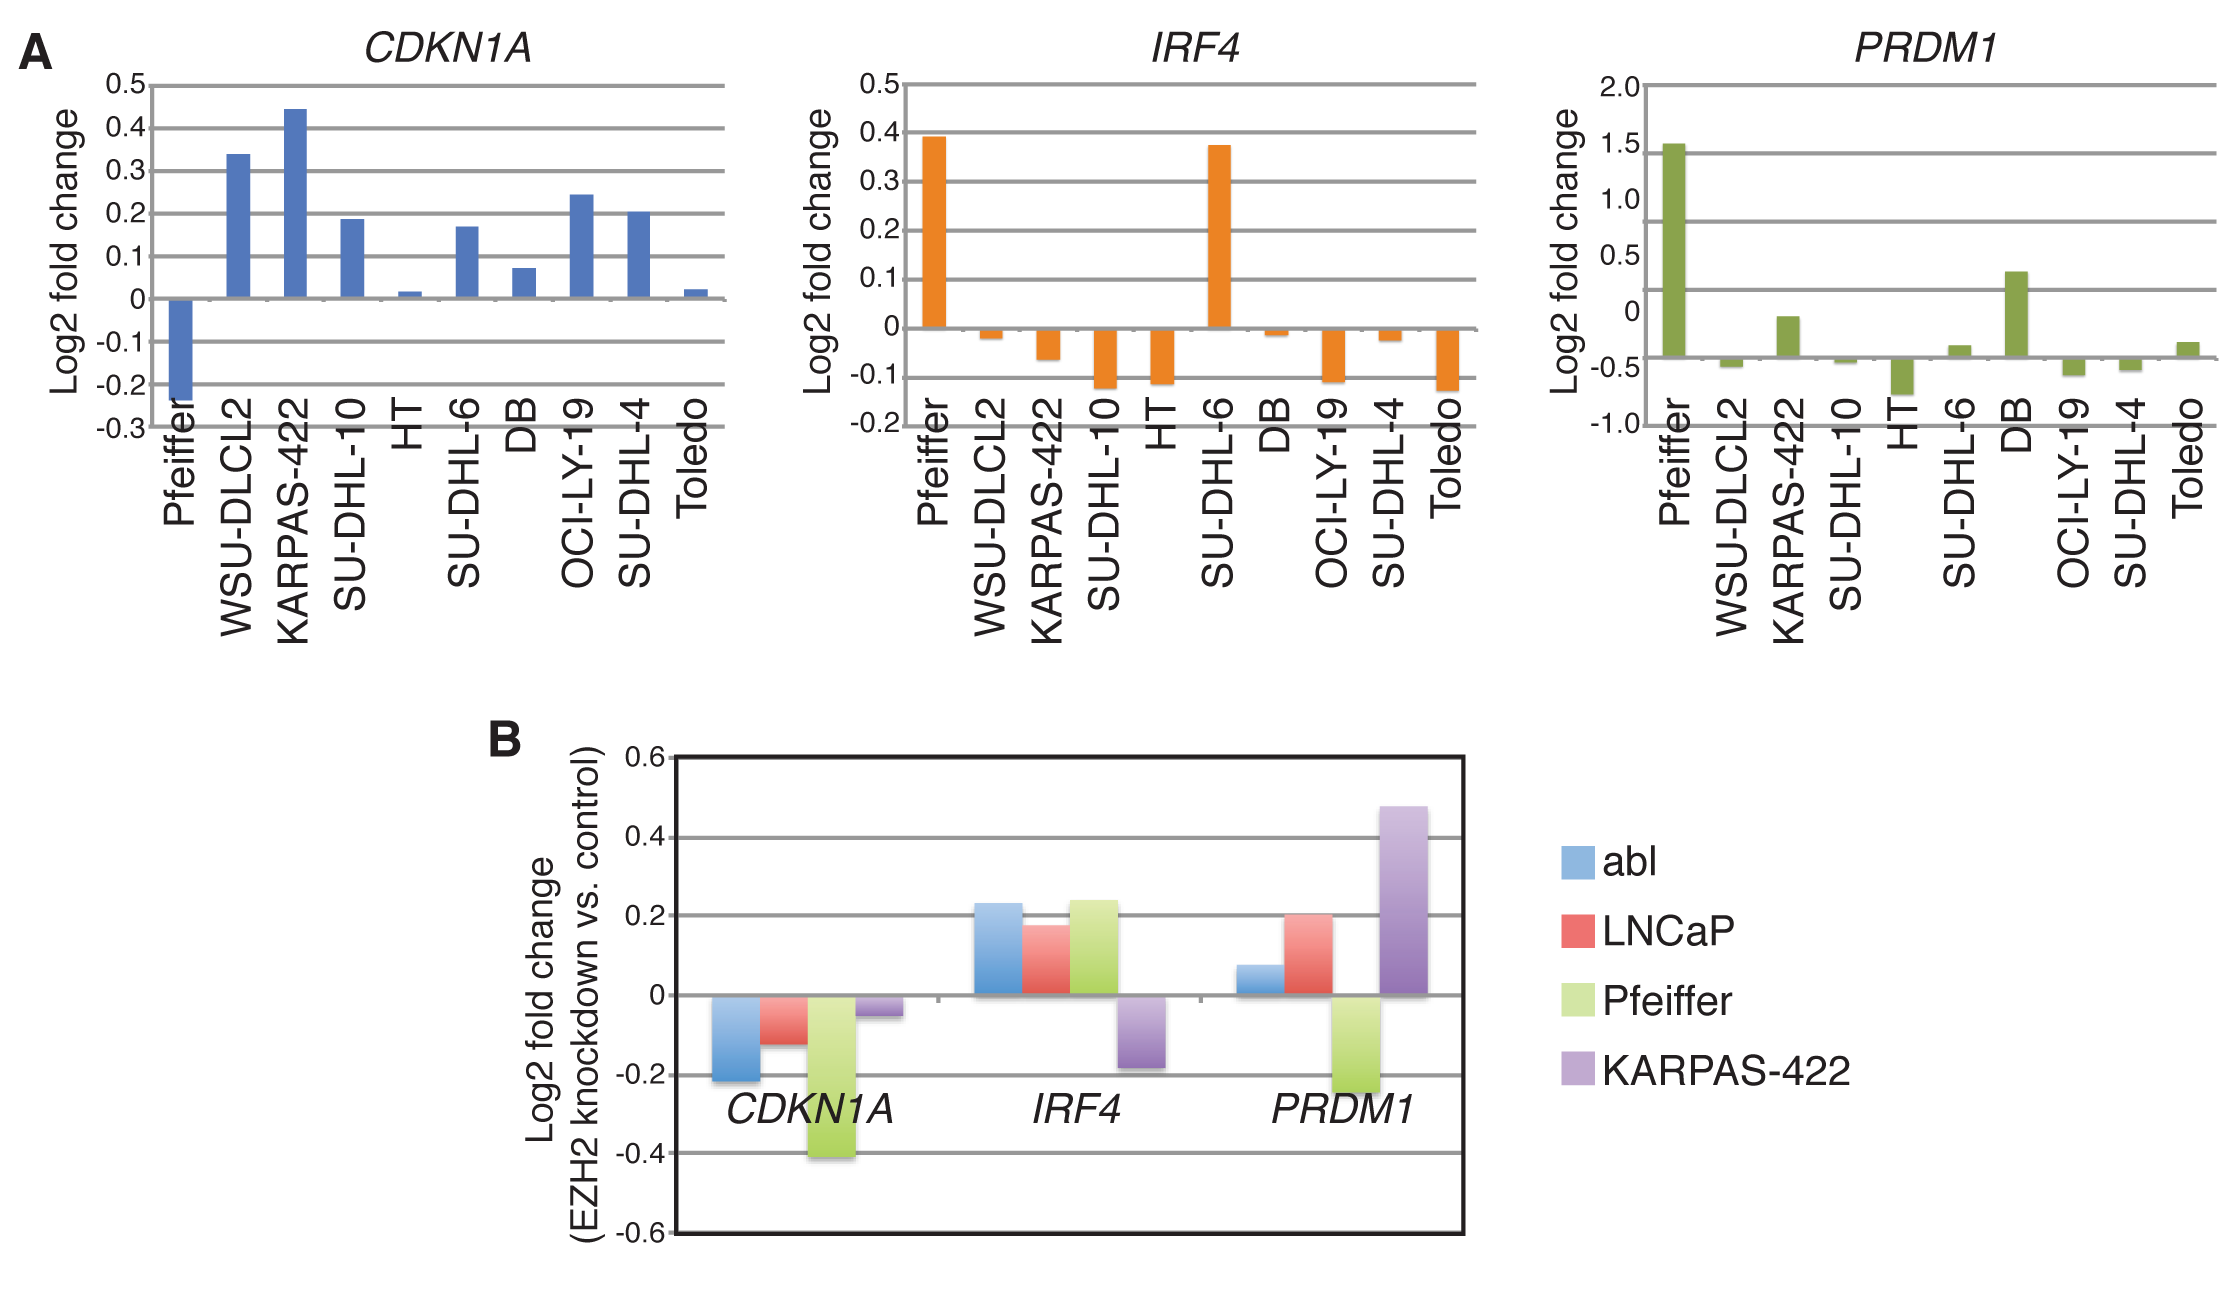


**Supplementary Figure 9.** The efficacy of EZH2 inhibitor in prostate cancer cells.

**Supplementary Figure 10.** Expression changes of selected target genes that are co-activated by both EZH2 and E2F1 upon EZH2 inhibitor treatment in LNCaP (A) and abl (B) cells.

**Supplementary Table 1.** Lists of EZH2 ensemble and solo peaks in abl cells.

**Supplementary Table 2.** 56 signature genes activated by EZH2 and bound by EZH2 solo peaks in abl cells.

**Supplementary Table 3.** 35 genes associated with EZH2-activated signature genes in prostate cancer. Genes highlighted in red fonts have known motif matrices.

**Supplementary Table 4.** 282 signature genes that are activated by E2F1 and contain E2F1 binding sites in abl cells.

**Supplementary Table 5.** Primer sequences for RT-PCR.

| **Sequence** | **Gene symbols** | **Strand** |
| --- | --- | --- |
| TTGGCTCCAATAAATGGACCAC | ARL6IP1 | F |
| GCTCTGCGTCGAGTTTTTACTA | ARL6IP1 | R |
| CCAAAAGCCAACCATTTGTGG | BRIX1 | F |
| GCTGTGATGGATCTTATGACACG | BRIX1 | R |
| AACACTCACCGATTCAAATGCT | CENPK | F |
| CAGTCAAGGGAATTGTTTCAGGT | CENPK | R |
| GAGACTATACGGGAAGAATTGGC | CEP76 ([1](#_ENREF_1)) | F |
| ACATCGTCAATGATTCCTCGAC | CEP76 ([1](#_ENREF_1)) | R |
| ATATGAAGCGTGCCGTAGACT | CHEK1 | F |
| TGCCTATGTCTGGCTCTATTCTG | CHEK1 | R |
| TTGTTGGCGGAAGCGTGTAAAATC | EZH2 ([1](#_ENREF_1)) | F |
| TCCCTAGTCCCGCGCAATGAGC | EZH2 ([1](#_ENREF_1)) | R |
| CTCAACACGCCTCATCCTC | PLK1 ([2](#_ENREF_2)) | F |
| CTCAACACGCCTCATCCTC | PLK1 ([2](#_ENREF_2)) | R |
| AGGACCACCGCATCTCTACAT | BIRC5 | F |
| AAGTCTGGCTCGTTCTCAGTG | BIRC5 | R |
| CGAGATCCCTCCAAAATCAA | GAPDH ([1](#_ENREF_1)) | F |
| TTCACACCCATGACGAACAT | GAPDH ([1](#_ENREF_1)) | R |
| TGAACCTCTATACATGCAACGAC | MCM4 | F |
| CAGGGTAACGGTCAAAGAAGATT | MCM4 | R |
| AGGTCGCGGGACATACTGT | NDC1 ([1](#_ENREF_1)) | F |
| TGCAGATGGGTAGAAATAGCACT | NDC1 ([1](#_ENREF_1)) | R |
| GCACAGGATTCTAAGTCCTAGCA | TACC3 | F |
| CCAGACCGGGTGTGAGTTTT | TACC3 | R |

**Supplementary Table 6.** Primer sequences for ChIP-qPCR.

| **Sequence** | **Gene regions** | **Strand** |
| --- | --- | --- |
| GGTTGGTGCTGCGATTATCT | ARL6IP1 promoter | F |
| TTCGGTTGGAGGACTCGTT | ARL6IP1 promoter | R |
| GCTGAAGGAGGCCTAGAGAG | BRIX1 promoter | F |
| TCGCTCCTATTTCCGATCTC | BRIX1 promoter | R |
| TCCAACCGAAACTCCAAAAC | CCND2 promoter ([1](#_ENREF_1)) | F |
| CTTTTCACCCTTCACGGAAA | CCND2 promoter ([1](#_ENREF_1)) | R |
| AACCGGCAGTTAGCTGGAC | CEP76 promoter ([1](#_ENREF_1)) | F |
| GAACGAGGGCAGCAAGCC | CEP76 promoter ([1](#_ENREF_1)) | R |
| ATGCCCATTGGATGTGCT | CENPK promoter | F |
| CGCGACACAAAACTCAGCTA | CENPK promoter | R |
| CCGCCGTCCTTAAATCTCTT | CHEK1 promoter | F |
| AAAAGGGTGACGTGGAGATG | CHEK1 promoter | R |
| CCTGCTCGAGTCTGCACTG | DAB2IP promoter ([1](#_ENREF_1)) | F |
| TCGAATCTCTCCCATGGTTC | DAB2IP promoter ([1](#_ENREF_1)) | R |
| CTAGGAGGGTGGAGGTAGGG | KIAA0066 promoter ([3](#_ENREF_3)) | F |
| GCCCCAAACAGGAGTAATGA | KIAA0066 promoter ([3](#_ENREF_3)) | R |
| CTGGTGCTGTAGGACCCAGT | MCM4 promoter | F |
| GACAGTGCCGCTTCTTTCA | MCM4 promoter | R |
| AGGCACCTTCTGTTGGCCGA | MYT1 promoter ([4](#_ENREF_4)) | F |
| AGGCAGCTGCCTCCCGTACA | MYT1 promoter ([4](#_ENREF_4)) | R |
| CAGTGAGGTCTCAGCATCAGCA | NUP214 promoter ([3](#_ENREF_3)) | F |
| CTGGAGGCTATGGGGGTACTTG | NUP214 promoter ([3](#_ENREF_3)) | R |
| AGGGGAAGGAGAGAGCAGTC | CDKN2A promoter ([5](#_ENREF_5)) | F |
| GGGTGTTTGGTGTCATAGGG | CDKN2A promoter ([5](#_ENREF_5)) | R |
| CCAAGTTCATCCTTGGGAGA | SLIT2 promoter ([1](#_ENREF_1)) | F |
| AAGGCAGTAGAGCCCACTCA | SLIT2 promoter ([1](#_ENREF_1)) | R |
| AATCGCTAGGCCGATTTCTT | SOX17 promoter ([1](#_ENREF_1)) | F |
| GAAGGGAACCCAGAGCCTTA | SOX17 promoter ([1](#_ENREF_1)) | R |
| CTTCGTCTGGACAAGCTCAA | NDC1 promoter ([1](#_ENREF_1)) | F |
| GCCGTCGAGACTACAGTTCC | NDC1 promoter ([1](#_ENREF_1)) | R |

**Supplementary Table 7.** A genome-wide mapping of relative copy number changes between LNCaP and abl cells. The genome re-sequencing data were mapped to hg19 assembly using BWA and were processed using GATK and VarScan.

**Reference**

1. K. Xu *et al.*, EZH2 oncogenic activity in castration-resistant prostate cancer cells is Polycomb-independent. *Science* **338**, 1465 (Dec 14, 2012).

2. F. Pattyn, F. Speleman, A. De Paepe, J. Vandesompele, RTPrimerDB: the real-time PCR primer and probe database. *Nucleic acids research* **31**, 122 (Jan 1, 2003).

3. S. Varambally *et al.*, Genomic loss of microRNA-101 leads to overexpression of histone methyltransferase EZH2 in cancer. *Science* **322**, 1695 (Dec 12, 2008).

4. A. Kirmizis *et al.*, Silencing of human polycomb target genes is associated with methylation of histone H3 Lys 27. *Genes Dev* **18**, 1592 (Jul 1, 2004).

5. W. Qi *et al.*, Selective inhibition of Ezh2 by a small molecule inhibitor blocks tumor cells proliferation. *Proc Natl Acad Sci U S A* **109**, 21360 (Dec 26, 2012).
